# Supplementary material for: Variant proteins stimulate more IgM+ GC B-cells revealing a mechanism of cross-reactive recognition by antibody memory
Source: eLife. 2018 May 1;7:e26832. doi: 10.7554/eLife.26832 (PMC5959717; doi:10.7554/eLife.26832)
Supplement: Figure 3—source data 1 [file elife-26832-fig3-data1.xlsx]

## Sheet: Sheet1
Figure 3 Source Data
Panel A				day 7								day 17							day 32
				sample								sample							sample
		1	2	3	4	5	6	Mean		1	2	3	4	5	6	Mean		1	2	3	Mean
	2ug	0.109593	0.97055	0.143785	0.144072	0.25709	0.14742	0.295418		0.221	0.128817	0.094284	0.370252	0.80364	0.133	0.291832		0.082984	0.271035	0.239112	0.19771
		0.201474	1.034	0.32424	0.380052	0.482454	0.3159	0.456353		0.3159	0.150837	0.136188	0.382512	0.72372	0.18	0.31486		0.209484	0.264695	0.271215	0.248465
		0.345384	0.948225	0.608915	0.755136	0.748296	0.781326	0.69788		0.4459	0.180564	0.251424	0.589706	0.70004	0.351	0.419772		0.334972	0.318585	0.349812	0.334456
6X		0.580068	0.97995	0.940875	0.971244	0.91896	0.984555	0.895942		0.6669	0.557106	0.487716	0.807934	0.79476	0.856	0.695069		0.497904	0.527805	0.571212	0.532307
competitor		0.894456	1.0011	1.01132	0.951372	0.971472	1.00983	0.973258		0.9191	0.941355	0.804324	0.948924	0.87172	0.94	0.904237		0.741796	0.83054	0.828036	0.800124
dlutions		0.998514	0.995225	1.07597	0.910386	1.0021	1.02668	1.00148		0.9789	0.965577	0.90792	1.00655	0.88948	0.926	0.945737		0.871332	0.971605	0.895563	0.912833
		0.981909	0.964675	0.971755	0.973728	0.967096	0.992979	0.975357		0.9555	0.986496	0.994056	0.946472	0.92944	0.964	0.962661		0.938124	0.952585	0.988551	0.959753
		1.00737	0.952925	1.0422	0.920322	0.992258	1.00772	0.987133		0.9568	0.954567	0.947496	0.989382	0.89984	0.948	0.949348		0.944196	1.00806	0.934308	0.962188
		1.01623	0.990525	1.06825	0.963792	0.993352	1.00983	1.007		1.014	1.03824	1.04876	1.04578	0.90872	0.98	1.00592		0.974556	1.0255	0.954234	0.984762
		0.932094	0.978775	0.994915	0.940194	0.958344	1.0193	0.970604		1.0218	1.05366	0.969612	0.970992	0.9324	0.96	0.984743		0.962412	1.01598	0.917703	0.965367
		0.994086	0.959975	1.05571	0.955098	0.949592	1.0172	0.98861		0.988	1.03164	0.984744	1.01513	0.962	0.964	0.990918		0.977592	1.00172	0.956448	0.978587
	5.5fg	0.999621	0.999925	0.99974	0.99981	0.999916	1.00035	0.999894		1.001	0.999708	0.999876	1.00042	0.99752	1.01	1.00142		0.999856	1.00013	0.999621	0.999871
Panel B				day 7							day 17							day 32
				sample							sample							sample
		1	2	3	4	5	Mean		1	2	3	4	5	6	Mean		1	2	3	Mean
	2ug	0.196863	0.21627	0.58395	0.13452	0.10379	0.247079		0.182214	0.126092	0.082056	0.339814	0.139454	0.316872	0.19775		0.082	0.068607	0.152285	0.100964
		0.35454	0.620775	0.750204	0.273288	0.11342	0.422445		0.377784	0.246749	0.146228	0.490266	0.237641	0.624616	0.353881		0.162	0.162261	0.169918	0.164726
		0.710946	0.863745	0.912336	0.579144	0.16478	0.64619		0.75366	0.411973	0.32612	0.909197	0.411247	0.825432	0.606271		0.315	0.372438	0.248465	0.311968
6X		0.916206	0.96387	0.94119	0.858096	0.42265	0.820402		0.979758	0.745682	0.574392	0.964968	0.601929	0.902368	0.79485		0.576	0.623997	0.40075	0.533582
competitor		0.985248	0.99858	0.946686	0.923232	0.8453	0.939809		0.94923	0.941342	0.847912	1.01166	0.745652	0.903672	0.899911		0.815	0.790614	0.644406	0.750007
dlutions		0.991779	0.97455	0.923328	0.961464	0.88703	0.94763		0.956862	0.983735	0.908928	1.01815	0.836724	0.9128	0.936199		0.902	0.89298	0.81753	0.870837
		0.967521	0.983895	0.976914	0.937392	0.91592	0.956328		0.945414	1.00004	0.960476	0.975344	0.912143	0.897152	0.948428		0.935	0.883179	0.916916	0.911698
		0.968454	0.97989	0.957678	0.9912	0.92234	0.963912		0.971172	0.971778	0.95206	1.06354	0.890798	1.0106	0.976658		0.969	0.996435	0.86562	0.943685
		1.00857	1.00659	1.00577	0.996864	0.9416	0.991879		0.959724	1.01743	0.958372	1.08299	0.883683	0.92584	0.971341		0.974	1.0095	0.931343	0.971615
		1.02257	1.02127	0.956304	0.972792	0.91806	0.9782		0.98262	0.998953	0.937332	1.04408	0.892221	0.929752	0.96416		0.98	0.971388	0.886459	0.945949
		1.01604	1.0186	0.974166	1.03368	0.93625	0.995748		0.97308	1.00547	0.966788	1.05316	0.991831	0.974088	0.994071		0.949	0.971388	0.928137	0.949508
	5.5fg	1.00018	0.999915	1.00027	0.999696	0.99938	0.999888		0.999792	1.00004	1.00045	0.999987	1.00037	1.00017	1.00013		1.007	0.999702	1.00027	1.00232
Panel C
Re-stimulating Antigen		E2
Group		Control	Control	Primed	Primed
Dose		0.1ug/ml	1ug/ml	0.1ug/ml	1ug/ml
		2.72465	4.01152	2.44938	9.94891
		2.54587	4.26917	4.22245	30.3936
		2.2355	7.4	1.44931	39.4768
		0.834261	2.41238	1.44817	15.9052
		0.777262	0.793503		11.2262
Re-stimulating Antigen		E3
Group		Control	Control	Primed	Primed
Dose		0.1ug/ml	1ug/ml	0.1ug/ml	1ug/ml
		1.30495	2.90891	5.25058	22.4216
		1.56402	2.1128	2.1369	44.3517
		1.67308	2.16568	1.84232	31.4551
		1.6948	2.74335	1.91756	9.97816
		1.34513	1.03982		10.644
Re-stimulating Antigen		E4
Group		Control	Control	Primed	Primed
Dose		0.1ug/ml	1ug/ml	0.1ug/ml	1ug/ml
		1.45855	3.11123	3.76085	18.8063
		1.65344	4.27116	2.35974	39.208
		2.01212	3.48848	1.27905	51.6898
		1.54735	2.23117	1.67614	15.3014
		0.664269	0.678657		7.71472
