# Supplementary material for: Variant proteins stimulate more IgM+ GC B-cells revealing a mechanism of cross-reactive recognition by antibody memory
Source: eLife. 2018 May 1;7:e26832. doi: 10.7554/eLife.26832 (PMC5959717; doi:10.7554/eLife.26832)
Supplement: Supplementary file 1. — VH sequences from single sorted GC B-cells. Sequences are grouped into treatment groups, and within this, arranged in blocks for sequences from individual mice. Raw sequences were analysed by IMGT V-Quest. Due to cloning and sequencing primers being at start of FR1 region, this region not included in mutation analysis. CDR1T, total mutations in CDR1; CDR1S, silent mutations in CDR1; CDR1R, replacement mutations in CDR1; likewise for FR2, CDR2 and FR3 regions; Tot Mut, total mutations in CDR1 to FR3 regions. [file elife-26832-supp1.xlsx]

## Sheet: Summary
E2 boost day 7	Sequence ID	V-GENE and allele	Isotype	CDR1T	CDR1S	CDR1R	FR2T	FR2S	FR2R	CDR2T	CDR2S	CDR2R	FR3T	FR3S	FR3R	Tot Mut	J-GENE and allele	D-GENE and allele	D-REGION reading frame	CDR-IMGT lengths	FR-IMGT lengths	AA JUNCTION	JUNCTION frame	Orientation	Sequence
	F41gca1_MsVHE	Musmus IGHV1-26*01 F, or Musmus IGHV1S29*02 F	M	6	1	5	4	1	3	1	0	1	4	3	1	15	Musmus IGHJ2*01 F			8.8.7	[14.17.38.11]	CARDYLDYW	in-frame	+	gctggtgagcctggagcttcatgaagatatcctgcaaggcttctggttactcattcactggctacaccatgaactgggtgaagcagagccatggaaagaaccttgaatggattggacttattaatccttacaatggtggtactagctacaaccagaagttcaagggcaaggccacattaactgtagacaagtcatccagcacagcctacatggagctcctcagtctgacatctgaggactctgcagtctattactgtgcaagagactaccttgactactggggccaaggcaccactctcacagtctcctcagagagtcagtccttcccaaatgccctt
	F41gcg2_MsVHE	Musmus IGHV1-67*01 P	G2B	0	0	0	0	0	0	0	0	0	3	1	2	3	Musmus IGHJ4*01 F	Musmus IGHD1-1*01 F	3	8.8.14	[15.17.38.11]	CARRGSSSYYYAMDYW	in-frame	+	ctggtgaggcctggggtctcagtgaagatttcctgcaagggttctggctacacattcactgattatgctatgcactgggtgaaacagagtcatgcaaagagtctagagtggattggagttattagtacttactatggtgatgctagctacaaccagaagttcaagggcaaggccacaatgactgtagacaaatcctccagcacagcctatatggaacttgccagactgacatctgaggattctgccatctattactgtgcaagacgggggagtagctcctattactatgctatggactactggggtcaaggaacctcagtcaccgtctcctcagccaaaacaacacccccatcagtctatccactggcccctgggtgtggagatacaactggttcctcc…
	F41gcb3_MsVHE	Musmus IGHV14-3*02 F	M	0	0	0	0	0	0	0	0	0	0	0	0	0	Musmus IGHJ2*01 F	Musmus IGHD2-3*01 F	3	8.8.7	[13.17.38.11]	CTLYDPAYW	in-frame	+	tgagcaggggcctcagtcaggttgtcctgcacagcttctggcttcaacattaaagacacctatatgcactgggtgaagcagaggcctgaacagggcctggagtggattggaaggattgatcctgcgaatggtaatactaaatatgacccgaagttccagggcaaggccactataacagcagacacatcctccaacacagcctacctgcagctcagcagcctgacatctgaggacactgccgtctattactgtactctctatgaccctgcctactggggccaaggcaccactctcacagtctcctcagagagtcagtccttcccaaattccttc
	F41gcb1_MsVHE	Musmus IGHV14-4*02 F	M	0	0	0	3	0	3	0	0	0	2	0	2	5	Musmus IGHJ2*01 F	Musmus IGHD2-13*01 F	1	8.8.9	[12.17.38.11]	CNALANNFDYW	in-frame	+	aggtaggggcctcagtcaagttgtcctgcacagcttctggcttcaacattaaagactactatatgaattgggtgaagtagaggcctgaacagggcctggagtggattggatggattgatcctgagaatggtgatactgaatatgtcccgaagttccagggcaaggccactatgactgcagacacatcctccaacacagcctacctgcagctcagcagcctgacatctgaggacactgccgtctatttctgtaatgcactggcgaacaattttgactactggggccaaggcaccactctcacagtctcctcagagagtcagtccttcccaaattctttc
	F41gce3_MsVHE	Musmus IGHV14-4*02 F	M	0	0	0	2	0	2	0	0	0	3	2	1	5	Musmus IGHJ2*01 F (see comment)	Musmus IGHD1-2*01 F	2	8.8.9	[12.17.38.11]	CNALLRLRDYW	in-frame	+	gtaggggcctcagtcaagttgtcctgcacagcttctggcttcaacattaaagactactatatgtattgggtgaagcagaggcctgaacagggcctggagtggattggatggattgatcctgagaatggtgatactgaatatgccccgaagttccagggcaaggccaccatgactgcatacacatcctccaacacagcctacctgcagctcagcagcctgacatctgaggacactgccgtctattattgtaatgcattactacggctacgggactactggggccaaggcaccactctcacagtctcctcagagagtcagtccttcccaaatgtcttccccca
	F41gch1_MsVHE	Musmus IGHV14-4*02 F	G1	0	0	0	0	0	0	0	0	0	2	0	2	2	Musmus IGHJ4*01 F	Musmus IGHD2-14*01 F	3	8.8.14	[13.17.38.11]	CNAKYYRYDGYAMDYW	in-frame	+	gaggtaggggcctcagtcaagttgtcctgcacagcttctggcttcaacattaaagactactatatgcactgggtgaagcagaggcctgaacagggcctggagtggattggatggattgatcctgagaatggtgatactgaatatgccccggagttccagggcaaggccactatgactgcagacacatcctccaacacaacctacctgcagctcagcagcctgacatctgaggacactgccgtctattactgtaatgcaaagtactataggtacgacggctatgctatggactactggggtcaaggaacctcagtcaccgtctcctcagccaaaacgacacccccatctgtctatccactggcccctggatctgctgcccaaactaactccatggtgacc…
	F41gcd1_MsVHE	Musmus IGHV1S137*01 [F]	M	1	0	1	0	0	0	1	0	1	4	2	2	6	Musmus IGHJ1*01 F			8.8.14	[15.17.38.11]	CARHYRYDGSWYFDVW (see Functionality comment)	in-frame	+	gtggtgaggcctggggtctcagtgaagatttcctgcaagggttctggctacacattcactgattatactatgcactgggtgaagcagagtcatgcaaagagtctagagtggattggagttattagtacttactatggtgatactagctacaaccagaagttcaagggcaaggccacaatgactgtagacaaatcctccagcacagcctatatggaacttgccagactgacatctgaggattctgccatctattactgtgcaagacactataggtacgacggaagctggtacttcgatgtctggggcgcagggaccacggtcaccgtctcctcagagagtcagtccttcccaaattcttt
	F41gcd2_MsVHE	Musmus IGHV1S137*01 [F]	G3	0	0	0	0	0	0	0	0	0	5	2	3	5	Musmus IGHJ4*01 F			8.8.14	[8.17.38.11]	CVRRGRSSFYYAMDYW (see Functionality comment)	in-frame	+	cagtgaagatttcctgcaagggttctggctacacattcactgattatgctatgcactgggtgaagcagagtcatgcaaagagtctagagtggattggagttattagtacttactatggtgatgctagctacaaccagaagttcaagggcaaggccacaatgactgtagacaaatcctccagcacagcctatatggaacttgccagactgacatctgaggattctgccatctataactgtgtaagaagggggagaagtagcttttactatgctatggactactggggtcaaggaacctcagtcaccgtctcctcagctacaacaacagccccatctgtctatcccttggtccctggctgcagtgacacatctggatcctcggtgacactgggatgccttg…
	F41gcf3_MsVHE	Musmus IGHV1S137*01 [F]	G1	0	0	0	1	0	1	2	1	1	8	4	4	11	Musmus IGHJ4*01 F			8.8.14	[16.17.38.11]	CARRGSSSYYYAMDYW (see Functionality comment)	in-frame	+	ctgagctggtgaggcctggggtctcagtgaagatttcgtgcaggggttctggctacacattcactgattatgctatgcactgggtgaagcagagtcatgcaaagagtccagagtggattggagttatgagtacttattatggtgatgctcgttataaccaaaagttcaagggcaaggccacaatgactgtagacaaatcctccagcacagcctatatggaacttgccagactgacatctgaggattctgccatctattactgtgcaagacgggggagtagctcctattactatgctatggactactggggtcaaggaacctcagtcaccgtctcctcagccaaaacgacacccccatctgtctatccactggcccctggatctgctgcccaaactaact…
	F41gcf2_MsVHE	Musmus IGHV1S34*01 F	G1	0	0	0	0	0	0	0	0	0	1	0	1	1	Musmus IGHJ3*01 F			8.8.11	[13.17.38.11]	CAREGGLGGFVYW (see Functionality comment)	in-frame	+	tgagactggggcttcagtgaagatatcctgcaaggcttctggttactcattcactggttactacatgcactgggtcaagcagagccatggaaagagccttgagtggattggatatattagttgttacaatggtgctactaggtacaaccagaagttcaagggcaaggccacatttactgtagacacatcctccagcacagcctacatgcagttcaacagcctgacatctgaagactctgcggtctattactgtgcaagagaggggggattaggggggtttgtttactggggccaggggactctggtcactgtctctgcagccaaaacgacacccccatctgtctatccactggcccctggatctgctgcccaaactaactccatggtgaccctgggatg…
	F41gca2_MsVHE	Musmus IGHV1S56*01 F	G1	2	0	2	1	0	1	2	0	2	6	1	5	11	Musmus IGHJ1*01 F			8.8.14	[15.17.38.11]	CAREGHYGYTWYFDVW (see Functionality comment)	in-frame	+	agctggtgagcctggggcttcggtgagatgtcctgcaaggcttctggctacaccttcacaacctactatatacactgggtgaggcagaggcctggacagggacttgagtggattggatggttttatcctggagatggtagtactaactacaatgagaagttcaagggcatgaccacactgactgcagacaaatcctccagcacagcctacatgttgctcagcagcctgacctctgaggactctgcgatctatttctgtgccagggagggtcactacggctacacttggtacttcgatgtctggggcgcagggaccacggtcaccgtctcctcagccaaaacgacacccccatctgtctatccactggcccctggatctgctgcccaaactaactccatg…
	F41gch2_MsVHE	Musmus IGHV2-6-1*01 F	M	0	0	0	1	0	1	1	1	0	0	0	0	2	Musmus IGHJ4*01 F	Musmus IGHD1-1*01 F	3	8.7.19	[16.17.38.11]	CARHGIYYYGSRREYYAMDYW	in-frame	+	ggactgggtggcgcctcacagagcctgtccatcacatgcaccatctcagggttctcattaaccagctatggtgtacactgggttcgccagcctccaggaaagggtctggagtggctggcagtgatatggagtgatggaagtacaacctataattcagctctcaaatccagactgagcatcagcaaggacaactccaagagccaagttttcttaaaaatgaacagtctccaaactgatgacacagccatgtactactgtgccagacatgggatttattactacggtagtaggagggagtattatgctatggactactggggtcaaggaacctcagtcaccgtctcctcagagagtcagtccttcccaaattcttcc
	F41gca3_MsVHE	Musmus IGHV2-6-7*01 F, or Musmus IGHV2-6-7*02 F	G1	0	0	0	0	0	0	2	0	2	2	0	2	4	Musmus IGHJ3*01 F	Musmus IGHD2-13*01 F	3	8.7.11	[12.17.38.11]	CARDGDYVWFAYW	in-frame	+	cgcctcacagagcctgtccatcacatgcaccgtctcagggttctcattaaccggctatggtgtaaactgggttcgccagcctccaggaaagggtctggagtggctgggaatgatatggggtgatagaaacacagactataattcagctctcaaatccagactgagcatcagctaggacgactccaagagccaagttttcttaaaaatgaacagtctgcaaactgatgacacagccaggtactactgtgccagagatggtgactacgtctggtttgcttactggggccaagggactctggtcactgtctctgcagccaaaacgacacccccatctgtctatccactggcccctggatctgctgcccaaactaactccatggtgaccctgggatgcctggt…
	F41gcg1_MsVHE	Musmus IGHV3-2*02 F	M	0	0	0	0	0	0	0	0	0	0	0	0	0	Musmus IGHJ2*01 F (see comment)	Musmus IGHD2-12*01 F	3	9.7.10	[12.17.38.11]	CASHYEGNFDYW	in-frame	+	aaccttctcagtctctgtccctcacctgcactgtcactggctactcaatcaccagtgattatgcctggaactggatccggcagtttccaggaaacaaactggagtggatgggctacataagctacagtggtagcactagctacaacccatctctcaaaagtcgaatctctatcactcgagacacatccaagaaccagttcttcctgcagttgaattctgtgactactgaggacacagccacatattactgtgccagtcactatgaagggaactttgactactggggccaaggcaccactctcacagtctcctcagagagtcagtccttcccaaatgtcttccccct
	F42gcg2_MsVHE	Musmus IGHV1-15*01 F	M	2	1	1	1	0	1	0	0	0	2	1	1	5	Musmus IGHJ4*01 F	Musmus IGHD2-1*01 F	3	8.8.10	[14.17.38.11]	CTKYGNYAMDYW	in-frame	+	ggtgaggcctggggcttcagtgacgctgtcctgcaaggcttcgggccacacatttacggactatgaaatgcactgggtgaggcagacacctgtgcatggcctggaatggattggagctattgatcctgaaactggtggtactgcctacaatcagaagttcaagggcaaggccacactgactgcagacaagtcctccagcacagcctacatggagctccgcagcctgacatctgaggactctgccgtctattactgtacaaaatatggtaactatgctatggactactggggtcatggaacctcagtcaccgtctcctcagagagtcagtccttcccaaatgtcttcccccttat
	F42gca3_MsVHE	Musmus IGHV14-3*02 F	M	2	0	2	1	0	1	1	0	1	1	0	1	5	Musmus IGHJ4*01 F	Musmus IGHD1-1*01 F	1	8.8.8	[13.17.38.11]	CAFTDAMDYW	in-frame	+	gacgcaggggcctcagtcaagttgtcctgcacagcttctgacttcaacattaaagacacctgtatacactgggtgaagcagaggcctgaacagggcctggagtggattggaaggattgatcctgcgaatggtaatgctaaatatgacccgcagttccagggcaaggccactataacagcagacacatcctccaacacagcctacctgcagctcagcagcctgacatctgaggacactgccgtctattactgtgcttttactgatgctatggactactggggtcaaggaacctcagtcaccgtctcctcagagagtcagtccttcccaaatgccctt
	F42gca5_MsVHE	Musmus IGHV14-4*02 F	G2A	0	0	0	0	0	0	0	0	0	1	0	1	1	Musmus IGHJ3*01 F	Musmus IGHD1-2*01 F	2	8.8.9	[14.17.38.11]	CYALLRLFTYW	in-frame	+	tgtgaggtcaggggcctcagtcaagttgtcctgcacagcttctggcttcaacattaaagactactatatgcactgggtgaagcagaggcctgaacagggcctggagtggattggatggattgatcctgagaatggtgatactgaatatgccccgaagttccagggcaaggccactatgactgcagacacatcctccaacacagcctacctgcagctcagcagcctgacatctgaggacactgccgtcttttactgttatgccctactacggctgtttacttactggggccaagggactctggtcactgtctctgcagccaaaacaacagccccatcggtctatccactggcccctgtgtgtggagatacaactggctcctcggtgactctaggatgcct…
	F42gcb2_MsVHE	Musmus IGHV14-4*02 F	M	0	0	0	1	0	1	0	0	0	2	0	2	3	Musmus IGHJ2*01 F	Musmus IGHD2-1*01 F	3	8.8.9	[11.17.38.11]	CNALYSYFDYW	in-frame	+	tcgggcctcagtcaagttgtcctgcacagcttctggcttcaacattaaagactactatatgccctgggtgaagcagaggcctgaacagggcctggagtggattggatggattgatcctgagaatggtgatactgaatatgtcccgaagttccagggcaaggccactatgactgcagacacatcctccaacacagcctacctgcagctcagcagcctgacacctgaggacactgccgtctattactgtaatgccctctactcctattttgactactggggccaaggcaccactctcacagtctcctcagagagtcagtccttcccaaatgtcttccccct
	F42gcd2_MsVHE	Musmus IGHV14-4*02 F	M	0	0	0	2	0	2	0	0	0	3	2	1	5	Musmus IGHJ4*01 F	Musmus IGHD1-1*01 F	2	8.8.9	[12.17.38.11]	CNALLYAMDYW	in-frame	+	gtaggggcctcagtcaagttgtcctgcacagcttctggcttcaacattaaagactactatatgtattgggtgaagcagaggcctgaacagggcctggagtggattggatggattgatcctgagaatggtgatactgaatatgccccgaagttccagggcaaggccactatgaccgcagacacatcctccaacacagcctacctgcagctcagcaggctgacatctgaggacactgccgtctattactgcaatgcattactctatgctatggactactggggtcaaggaacctcagtcaccgtctcctcagagagtcagtccttcccaaatgtcttccccctc
	F42gcf1_MsVHE	Musmus IGHV14-4*02 F	G3	0	0	0	1	0	1	0	0	0	2	1	1	3	Musmus IGHJ2*01 F (see comment)	Musmus IGHD4-1*01 F	1	8.8.9	[13.17.38.11]	CNDLTRTFDYW	in-frame	+	gaggtaggggcctcagtcaagttgtcctgcacagcttctggcttcaacattaaagactactatatacactgggtgaagcagaggcctgaacagggcctggagtggattggatggattgatcctgagaatggtgatactgaatatgccccgaagttccagggcaaggccactatgactgcagacacatcctccaacacagcctacctacagctcaccagcctgacatctgaggacactgccgtctattactgtaatgatctaactcggacctttgactactggggccaaggcaccactctcacagtctcctcagctacaacaacagccccatctgtctatcccttggtccctggctgcagtgacacatctggatcctcggtgacactgggatgccttgtc…
	F42gcg5_MsVHE	Musmus IGHV14-4*02 F	G1	0	0	0	2	0	2	0	0	0	0	0	0	2	Musmus IGHJ2*01 F (see comment)	Musmus IGHD3-3*01 F	2	8.8.9	[13.17.38.11]	CNALLGLVDYW	in-frame	+	gaggtaggggcctcagtcaagttgtcctgcacagcttctggcttcaacattaaagactactatatgtattgggtgaagcagaggcctgaacagggcctggagtggattggatggattgatcctgagaatggtgatactgaatatgccccgaagttccagggcaaggccactatgactgcagacacatcctccaacacagcctacctgcagctcagcagcctgacatctgaggacactgccgtctattactgtaatgcactactggggctggttgactactggggccaaggcaccactctcacagtctcctcagccaaaacgacacccccatctgtctatccactggcccctggatctgctgcccaaactaactccatggtgaccctgggatgcctggtc…
	F42gch1_MsVHE	Musmus IGHV14-4*02 F	G1	1	0	1	1	0	1	1	0	1	2	0	2	5	Musmus IGHJ4*01 F	Musmus IGHD1-1*01 F	2	8.8.9	[11.17.38.11]	CNALLYAMDYW	in-frame	+	taggggcctcagtcaagttgtcctgcacagcttctggcttcaacattaaagacttctatatgaactgggtgaagcagaggcctgaacagggcctggagtggattggatggattgatcctgagaatggtgatgctgaatatgccccgaagttccagggcaaggccactatgacttcagacacatcctccaacacagcctccctgcagctcagcagcctgacatctgaggacactgccgtctattactgtaatgcattactctatgctatggattactggggtcaaggaacctcagtcaccgtctcctcagccaaaacgacacccccatctgtctatccactggcccctggatctgctgcccaaactaactccatggtgaccctgggatgcctggtcaagg…
	F42gce1_MsVHE	Musmus IGHV1S81*02 [F]	M	0	0	0	1	0	1	1	0	1	4	1	3	6	Musmus IGHJ2*01 F (see comment)			8.8.7	[15.17.38.11]	CGNLLPDQW (see Functionality comment)	in-frame	+	actggtgagcctggggcttcagtgaagctgtcctgcaaggcttctggctacaccttcaccagctactggatgcactgggtgaagcagaggcctggacaaggccttgagtggattggaaagattaatcctagcaacggtcgtattaactataatgagaagttcaagaccaaggccacactgactgcagacaaatcctccagcacagcctacatgcaactcagcagcctgacatctgaggactctgcggtctattactgtggaaatctactacctgaccagtggggccaaggcaccactctcacagtctcctcagagagtcagtccttcccaaatgtcttccccctc
	F42gcb1_MsVHE	Musmus IGHV2-6-7*01 F, or Musmus IGHV2-6-7*02 F	M	0	0	0	0	0	0	0	0	0	2	2	0	2	Musmus IGHJ3*01 F	Musmus IGHD2-14*01 F	3	8.7.11	[12.17.38.11]	CARDAYRSWFAYW	in-frame	+	gcgcctcacagagcctgtccatcacatgcaccgtctcagggttctcattaaccggctatggtgtaaactgggttcgccagcctccaggaaagggtctggagtggctgggaatgatatggggtgatggaagcacagactataactcagctctcaaatccagactgagcatcagcaaggacaactccaagagtcaagttttcttaaaaatgaacagtctgcaaactgatgacacagccaggtactactgtgccagagatgcttataggtcctggtttgcttactggggccaagggactctggtcactgtctctgcagagagtcagtccttcccaaatgtcttccccc
	F42gcc2_MsVHE	Musmus IGHV5-6*01 F, or Musmus IGHV5-6*02 [F] or Musmus IGHV5-6*03 [F] or Musmus IGHV5-6-1*01 F	M	1	0	1	0	0	0	1	0	1	1	0	1	3	Musmus IGHJ4*01 F			8.8.9	[14.17.38.11]	CAKLHYAMDYW	in-frame	+	tagtgagcctggagggtccctgaactctcctgtgcagcctctggattcactttcattagctatggcatgtcttgggttcgccagactccagacaagaggctggagtgggtcgcaaccattactagtggtggtagttacacctgctatccagacagtgtgaaggggcgattcaccatctccagagacaatgccaagaacaccctgtacctgcaaatgagcagtctgaagtctgaggacacagccatgtattactgtgcaaaactccactatgctatggactactggggtcaaggaacctcagtcaccgtctcctcagagagtcagtccttcccaaattccta
	F42gca2_MsVHE	Musmus IGHV7-3*02 F	G1	0	0	0	0	0	0	0	0	0	1	0	1	1	Musmus IGHJ3*01 F	Musmus IGHD2-13*01 F	2	8.10.10	[14.17.38.11]	CARGGLFFFAYW	in-frame	+	ggtacgcctgggggttctctgagactctcctgtgcaacttctgggttcaccttcactgattactacatgagctgggtccgccagcctccaggaaaggcacttgagtggttgggttttattagaaacaaagctaatggttacacaacagagtacagtgcatctgtgaagggtcggttcaccatctccagagataattcccaaagcatcctctatcttcaaatgaacaccctgagaactgaggacagtgccacttattactgtgcaagagggggactgtttttttttgcttactggggccaagggactctggtcactgtctctgcagccaaaacgacacccccatctgtctatccactggcccctggatctgctgcccaaactaactccatggtgaccctg…
	F42gcd1_MsVHE	Musmus IGHV7-3*02 F	M	1	0	1	0	0	0	0	0	0	0	0	0	1	Musmus IGHJ2*01 F			8.10.6	[13.17.38.11]	CARDGGYW	in-frame	+	tacgcctgggggttctctgagactctcctgtgcaacttctgggttcaccttcactgatcactacatgagctgggtccgccagcctccaggaaaggcacttgagtggttgggttttattagaaacaaagctaatggttacacaacagagtacagtgcatctgtgaagggtcggttcaccatctccagagataattcccaaagcatcctctatcttcaaatgaacaccctgagagctgaggacagtgccacttattactgtgcaagagatggtggctattggggccaaggcaccactctcacagtctcctcagagagtcagtccttcccaaatgtcttccccctta
	F43gch1_MsVHE	Musmus IGHV1-37*01 F	M	0	0	0	0	0	0	1	1	0	3	0	3	4	Musmus IGHJ4*01 F	Musmus IGHD3-3*01 F	3	8.8.10	[12.17.38.11]	CGREGFYAMDYW	in-frame	+	agcctggggcttcagtgaagatatcctgcaaggcttctggttactcatttactggctactttatgaactgggtgaagcagagccatggaaagagccttgagtggattggacgtattaatccttacaatggtgataccttctacaaccagaagttcaagggcaaggccacattgactgtagacaaatcctctaccacagcccacatggagctcctgagcctgacatctgaggactctgcagtctataattgtggaagagagggcttctatgctatggactactggggtcaaggaacctcagtcaccgtctcctcagagagtcagtccttcccaaatgtcttccccctca
	F43gch2_MsVHE	Musmus IGHV1-69*02 F	G2A	1	0	1	0	0	0	2	0	2	3	2	1	6	Musmus IGHJ4*01 F	Musmus IGHD2-1*01 F	3	8.8.13	[14.17.38.11]	CARSIYGNYYAMDFW	in-frame	+	cttgtgagcctggggcttcagtgaagctgtcctgcaaggcttctggctacgccttcaccagctactggatgcactgggtgaagcagaggcctggacaaggccttgagtggatcggagagattgatccttctgatggttatcctaacttcaatcaaaagttcaagggcaaggccacattgactgtagacaaatcctccagtacagcctacatgcagctcagcagcctgacatctgaggactctgccgtctattactgtgcaagatctatctatggtaactactatgctatggacttctggggtcaaggaacctcagtcaccgtctcctcagccaaaacaacagccccatcggtctatccactggcccctgtgtgtggagatacaactggctcctcggtga…
	F43gca3_MsVHE	Musmus IGHV1-87*01 F	G2A	2	1	1	1	0	1	0	0	0	2	0	2	5	Musmus IGHJ4*01 F	Musmus IGHD1-1*01 F	1	8.8.14	[13.17.38.11]	CASLTTVVEDYAMDYW	in-frame	+	agacctggggcttcagtgaagttgtcctgcaaggcttctggctacacctttactagctcctggatgcagtgggtaaaacagaggcctggacagggtctggaatggattgggtctatttatcctggagatggtgatactaggtacactcagaagttcaagggcaaggccacattgactgcagataaatcctccagcacagcctacatgcaactcagcagcttggcatctgaggactctgcggtctattactgtgcaagccttactacggtagtagaagactatgctatggactactggggtcaaggaacctcagtcaccgtctcctcagccaaaacaacagccccatcggtctatccactggcccctgtgtgtggagatacaactggctcctcggggact
	F43gcg3_MsVHE	Musmus IGHV1-9*01 F	M	2	0	2	1	0	1	1	0	1	2	0	2	6	Musmus IGHJ3*01 F	Musmus IGHD2-13*01 F	3	8.8.8	[13.17.38.11]	CARGDYKAYW	in-frame	+	atgaacctggggcctcagtgaagatatcctgcaaggctactggctacacattcagtagctactggatagagtgggtaaatcagaggcctggacatggccttgagtggattggagagattttacctggaagtggttgtactaactacaatgagaagttcaagggcaaggccacattcactgcagatacatcctccaacacagcctacatgcaactcagcagcctgacatctgaggactctgccgtctattactgtgcaagaggcgattacaaggcttactggggccaagggactctggtcactgtctctgcagagagtcagtccttcccaaatgtcttccccctca
	F43gcb1_MsVHE	Musmus IGHV14-3*02 F	M	1	0	1	1	0	1	1	1	0	3	0	3	6	Musmus IGHJ2*01 F	Musmus IGHD1-2*01 F	1	8.8.12	[13.17.38.11]	CAREGVTTASFDYW	in-frame	+	tgagcaggggcctcaggcaagttgtcctgcagagcttctggctgcaacattaaagacacctatatgcactgggtgaagcagaggcctaaacagggcctggagtggattggaaggattgatcctgcgaatgggaatactaaatatgacccgaagttctagggcaaggccactataatagcagacacatcctccaaaacagcctacctgcagctcagcagcctgacatctgaggacactgccgtctattactgtgctagagagggggttactacggcctcctttgactactggggccaaggcaccactctcacagtcttttcagagagtcagtccttcccaaatgccttt
	F43gcb2_MsVHE	Musmus IGHV14-4*02 F	G1	0	0	0	2	0	2	0	0	0	0	0	0	2	Musmus IGHJ2*01 F (see comment)	Musmus IGHD1-2*01 F	2	8.8.9	[12.17.38.11]	CNSLLRLEDYW	in-frame	+	aggtaggggcctcagtcaagttgtcctgcacagcttctggcttcaacattaaagactactatatgtactgggtgaagtagaggcctgaacagggcctggagtggattggatggattgatcctgagaatggtgatactgaatatgccccgaagttccagggcaaggccactatgactgcagacacatcctccaacacagcctacctgcagctcagcagcctgacatctgaggacactgccgtctattactgtaattcattactacggctcgaagactactggggccaaggcaccactctcacagtctcctcagccaaaacgacacccccatctgtctatccactggcccctggatctgctgcccaaactaactccatggtgaccctgggatgcctggtca…
	F43gcc1_MsVHE	Musmus IGHV14-4*02 F	M	0	0	0	1	0	1	1	0	1	2	1	1	4	Musmus IGHJ2*01 F (see comment)	Musmus IGHD2-10*02 F	3	8.8.9	[12.17.38.11]	CNALYGNLDYW	in-frame	+	gtaggggcctcagtcaagttgtcctgcacagcttctggcttcaacattaaagactactatatgccctgggtgaagcagaggcctgaacagggcctggagtggattggatggattgatcctgagaatggtgatcctgaatatgccccgaagttccggggcaaggccactatgactgcagacacatcctccaacacagcctacctgcagctcagtagcctgacatctgaggacactgccgtctattactgtaatgccctgtatggtaaccttgactactggggccaaggcaccactctcacagtctcctcagagagtcagtccttcccaaatgtcttccccctcac
	F43gcc2_MsVHE	Musmus IGHV14-4*02 F	M	0	0	0	0	0	0	1	0	1	3	1	2	4	Musmus IGHJ3*01 F, or Musmus IGHJ3*02 P (see comment)	Musmus IGHD1-2*01 F	1	8.8.11	[14.17.38.11]	CNLITTTSLFA*W	in-frame	+	gtgagggcaggggcctcagtcaagttgtcctgcacagcttctggcttcaacattaaagactactatatgcactgggtgaagcagaggcctgaacagggcctggagtggattggatggattgatcctgagaagggtgatactgaatatgccccgaagttccagggcaaggccactatgactgcagacacatcctccaacacagcctacctgcacctcagcagtctgacatctgaggacactgacgtctattactgtaacctcattacaacgactagcctttttgcttagtggggccaagggactctggtcactgtctctgcagagagtcagtccttcccaaatgtcttcccaca
	F43gcd1_MsVHE	Musmus IGHV14-4*02 F	G1	0	0	0	0	0	0	0	0	0	0	0	0	0	Musmus IGHJ2*01 F (see comment)	Musmus IGHD1-2*01 F	2	8.8.9	[12.17.38.11]	CNALLRLKDYW	in-frame	+	aggtaggggcctcagtcaagttgtcctgcacagcttctggcttcaacattaaagactactatatgcactgggtgaagcagaggcctgaacagggcctggagtggattggatggattgatcctgagaatggtgatactgaatatgccccgaagttccagggcaaggccactatgactgcagacacatcctccaacacagcctacctgcagctcagcagcctgacatctgaggacactgccgtctattactgtaatgccctactacggctaaaagactactggggccaaggcaccactctcacagtctcctcagccaaaacgacacccccatctgtctatccactggcccctggatctgctgcccaaactaactccatggtgaccctgggatgcctggtca…
	F43gce1_MsVHE	Musmus IGHV14-4*02 F	G1	0	0	0	0	0	0	0	0	0	0	0	0	0	Musmus IGHJ4*01 F			8.8.9	[13.17.38.11]	CNALYYAMDYW	in-frame	+	gaggtaggggcctcagtcaagttgtcctgcacagtttctggcttcaacattaaagactactatatgcactgggtgaagcagaggcctgaacagggcctggagtggattggatggattgatcctgagaatggtgatactgaatatgccccgaagttccagggcaaggccactatgactgcagacacatcctccaacacagcctacctgcagctcagcagcctgacatctgaggacactgccgtctattactgtaatgccctttactatgctatggactactggggtcaaggaacctcagtcaccgtctcctcagccaaaacgacacccccatctgtctatccactggcccctggatctgctgcccaaactaactccatggtgaccctgggatgcctggtc…
	F43gcf2_MsVHE	Musmus IGHV14-4*02 F	M	0	0	0	0	0	0	1	0	1	0	0	0	1	Musmus IGHJ4*01 F	Musmus IGHD2-1*01 F	2	8.8.9	[13.17.38.11]	CNALLNAMDYW	in-frame	+	gaggtaggggcctcagtcaagttgtcctgcacagcttctggcttcaacattaaagactactatatgcactgggtgaagcagaggcctgaacagggcctggagtggattggatggattgatcctgagagtggtgatactgaatatgccccgaagttccagggcaaggccactatgactgcagacacatcctccaacacagcctacctgcagctcagcagcctgacatctgaggacactgccgtctattactgtaatgctctactaaatgctatggactactggggtcaaggaacctcagtcaccgtctcctcagagagtcagtccttcccaaattccttc
	F43gcg2_MsVHE	Musmus IGHV1S33*01 F	M	0	0	0	0	0	0	0	0	0	2	0	2	2	Musmus IGHJ4*01 F			8.8.14	[15.17.38.11]	CARGDGYPHYYALDYW (see Functionality comment)	in-frame	+	gctggtgagcctggggttttagtgaagatatcctgcaaggcttctggttacaccttcacaagctacgatataaactgggtgaagcagaggcctggacagggacttgagtggattggatggatttatcctggagatggtagtactgagtacaatgagaaattcaagggcaaggccacactgactgcagacaattcctccagcacagcctacatgcagctcagcagcctgacttctgagaactctgcagtctatttctgtgcaagaggtgatggttatcctcattactatgctttggactactggggtcaaggaacctcagtcaccgtctcctcagagagtcagtccttcccaaatgccttcc
	F43gcd3_MsVHE	Musmus IGHV1S56*01 F	G1	2	0	2	0	0	0	1	0	1	6	2	4	9	Musmus IGHJ2*01 F			8.8.9	[15.17.38.11]	CARDGYYFDYW (see Functionality comment)	in-frame	+	gctggtgagcctggggcttcagtgaagatctcctgcaaggcttctggctacaccttcacaacctactatatacactgggtgaagcagaggcctggacagggacttgagtggattggatggatttatcctggagatggtagtactaagtacaatgagaagttcaagggcaagaccacactgactgcagacaaatcctccatcacagcctacatgttgctcagcagcctgacctctgaggactctgcgatctacttctgtgcaagggacggctactactttgactactggggccaaggcaccactctcacagtctcctcagccaaaacgacacccccatctgtctatccactggcccctggatctgctgcccaaactaactccatggtgaccctgggatgc…
	F43gcf3_MsVHE	Musmus IGHV1S56*01 F	M	2	0	2	1	1	0	1	0	1	5	1	4	9	Musmus IGHJ4*01 F			8.8.10	[15.17.38.11]	CARGVRYVLDYW (see Functionality comment)	in-frame	+	gctggtgagcctggggcttcagtgaagatgtcctgcaaggcttctggctacaccttcacaacctactatatacactgggtgaagcagaggcctggacagggactagagtggattggatggatttatcctggagatggtagtactaagtacaatgagaagttcaagggcaagaccacactgactgcagacaaatcctccagcacagcctacatgttgctcagcagcctgacctctgatgactctgcgatctatttctgtgcaaggggggtacgctatgttttggactactggggtcaaggaacctcagtcaccgtctcctcagagagtcagtccttcccaaattcctt
E2 boost day 17	Sequence ID	V-GENE and allele	Isotype	CDR1T	CDR1S	CDR1R	FR2T	FR2S	FR2R	CDR2T	CDR2S	CDR2R	FR3T	FR3S	FR3R	Tot Mut	J-GENE and allele	D-GENE and allele	D-REGION reading frame	CDR-IMGT lengths	FR-IMGT lengths	AA JUNCTION	JUNCTION frame	Orientation	Sequence
	F91gcb2_MsVHE	Musmus IGHV1-18*01 F	M	0	0	0	0	0	0	0	0	0	1	0	1	1	Musmus IGHJ3*01 F	Musmus IGHD2-4*01 F	1	8.8.16	[15.17.38.11]	CARRGTMITTGASWFAYW	in-frame	+	ctgggtgagcctggggcttcagtgaagataccctgcaaggcttctggatacacattcactgactacaacatggactgggtgaagcagagccatggaaagagccttgagtggattggagatattaatcctaacaatggtggtactatctacaagcagaagttcaagggcaaggccacattgactgtagacaagtcctccagcacagcctacatggagctccgcagcctgacatctgaggacactgcagtctattactgtgcaagaaggggtactatgattacgacgggagcttcctggtttgcttactggggccaagggactctggtcactgtctctgcagagagtcagtccttcccaaattcttcc
	F91gce2_MsVHE	Musmus IGHV1-18*01 F	G1	2	0	2	4	1	3	2	1	1	4	2	2	12	Musmus IGHJ4*01 F	Musmus IGHD2-4*01 F	1	8.8.14	[14.17.38.11]	CARSTMITTGGAMDYW	in-frame	+	ctggtgagcctggggcttcagtgaagatatcctgcaagacttctggatacacattcactgaatacaccatgcactgggtgaagcagagccacggagagagccttgagtggattggaggtattaatcctaacaatggtgataccacctacaaccagaagttcaagggcaaggccacattgactgtagacaagtcctccagtacagcctacatggaactccgcagcctgacatctgaggactctgcagtctattactgtgcaagatctactatgattacgacggggggggctatggactactggggtcaaggaacctcagtcaccgtctcctcagccaaaacgacacccccatctgtctatccactggcccctggatctgctgcccaaactaactccatgg…
	F91gcd1_MsVHE	Musmus IGHV1-26*01 F	M	2	1	1	3	1	2	1	0	1	5	1	4	11	Musmus IGHJ3*01 F	Musmus IGHD2-14*01 F	3	8.8.14	[15.17.38.11]	CARSYFRYDDSWFAYW	in-frame	+	gctggtgagcctggggcttcagtgaagatgtcctgtaaggcttctggatacacattccctgactactacatgaagtgggtgaagcagagtcatggaaagagccgtgagtggattggagatattaatcctaacaatggtgctactaactacaaccagaagttcaagggcaaggccacattgactgtagacaaatcctccagcacagcctacatgcagctcaacagcctgacatctgaggactctgcagtctattactgtgcaagatcgtactttaggtacgacgattcctggtttgcttactggggccaagggactctggtcactgtctctgcagagagtcagtccttcccaaattcctt
	F91gcd3_MsVHE	Musmus IGHV1-4*01 F	G1	3	0	3	0	0	0	1	0	1	4	0	4	8	Musmus IGHJ2*01 F (see comment)	Musmus IGHD1-2*01 F	2	8.8.12	[8.17.38.11]	CAREGLLRLRLDYW	in-frame	+	cagtgaagatgtcctgcaaggcttctggctacacctttactaactactggatgcactgggtaaaacagaggcctggacagggtctggaatggattggatacattaatcctagcactggttatactgagtacattcagaggttcaaggacaaggccacattgaatgcagacaaatcctccagcacagcctacatgcaactgagcagcctgacatctgaggactctgcagtctattactgtgcaagagagggattactacggctacgccttgactattggggccaaggcaccactctcacagtctcctcagccaaaacgacacccccatctgtctatccactggcccctggatctgctgcccaaactaactccatggtgaccctgggatgcctggtcaagg…
	F91gcc4_MsVHE	Musmus IGHV1-54*01 F, or Musmus IGHV1-54*03 [F]	M	0	0	0	1	0	1	1	0	1	3	1	2	5	Musmus IGHJ4*01 F	Musmus IGHD2-12*01 F	3	8.8.14	[14.17.38.11]	CARYYRYDEGYAMDYW	in-frame	+	gtagagcctgggacttcagtgaaggtgtcctgcaaggcttctggatacgccttcactaattacttgatagagtggataaagcagaggcctggacagggccttgagtggattggagtgattaatcctggaagtggtgatactaactacaatgagaaattcaagggcaaggcaacactgactgcagacaaatcctccagccctgcctacatgcagctcagcagcctgacatctgatgactctgcggtctatttctgtgcaagatactatagatacgacgaaggctatgctatggactactggggtcaaggaacctcagtcaccgtctcctcagagagtcagtccttcccaaatgcccttc
	F91gcg3_MsVHE	Musmus IGHV1-80*01 F	G1	2	2	0	3	1	2	0	0	0	7	6	1	12	Musmus IGHJ2*01 F (see comment)	Musmus IGHD2-14*01 F	3	8.8.14	[16.17.38.11]	CASSLYRYDVGVFDYW	in-frame	+	tgagctggtgaggcctgggtcctcagtgaagatttcctgcaaggcttctggctatgcattcagtagttactggatgaactgggtgaaacagaggcctggacggggtcttgagtggattggacagatttatcctggagatggtgatactaactacaatggaaagttcaagggtaaagccacactgactgcagacaaatcctccagcgcagcctacatgcagctcagcagtctaacatctgaggactctgcggtctatttctgtgcaagttccctctataggtacgacgtaggggtctttgactactggggccaaggcaccactctcacagtctcctcagccaaaacgacacccccatctgtctatccactggcccctggatctgctgcccaaactaactc…
	F91gca3_MsVHE	Musmus IGHV1-87*01 F	G3	2	1	1	2	1	1	0	0	0	4	1	3	8	Musmus IGHJ2*01 F	Musmus IGHD2-10*01 F	3	8.8.11	[15.17.38.11]	CARSTYYGPFDYW	in-frame	+	gctggcagacctggggcttcagtgaagttgtcctgcaaggcttctggctacacctttactacctactggatacagtgggtaaaacagaggccaggacagggtctggaatggattggggctatttatcctggagatggtgatactaggtacactcagaagttcaaggacaaggccacattgactgcagataaatcttccagcacagcctacatgcaactcagcagcttggcatctgaggactctgcggtctattactgtgcaagatcgacctactatggcccctttgactactggggccaaggcaccactctcagagtctcctcagctacaacaacagccccatctgtctatcccttggtccctggctgcagtgacacatctggatcctcggtgacactg…
	F91gce1_MsVHE	Musmus IGHV14-3*02 F	M	1	1	0	1	0	1	1	1	0	5	2	3	8	Musmus IGHJ4*01 F	Musmus IGHD2-1*01 F	3	8.8.13	[13.17.38.11]	CARGYGNPYYDMDYW	in-frame	+	tgagcaggggcctcagtcaagttgtcctgcacaggttctggcttcaacataaaagacacctatttgcactgggtgaagcagaggcctgaacagggcctggagtggattggaaggattgatcctgcgaatggtaacactaaatgtgacccgaagttccagggcaaggccactataacagcagacacatcgtccaacacagcctaattgcaggtcagcagcctgacatctgaggacactgccgtctattactgtgctagaggctatggtaacccctactatgatatggactactggggtcaaggaacctcagtcattgtctcctcagagagtcagtccttcccaaatgcc
	F91gcg2_MsVHE	Musmus IGHV14-3*02 F	G1	0	0	0	1	0	1	3	1	2	1	1	0	5	Musmus IGHJ4*01 F	Musmus IGHD2-2*01 F	1	8.8.13	[13.17.38.11]	CASGVPAPFYAMDYW	in-frame	+	tgagcaggggcctcactcaagttgtcctgcacagcttctggcttcaacattaaagacacctatatgcactgggtgaatcagaggcctgaacagggcctggagtggattggaaggattgatcctgcgattggagatactaaatatgacccgaagttccagggcaaggccacgataacagcagacacatcctccaacacagcctacctgcagctcagcagcctgacatctgaggacactgccgtctattactgtgctagtggggttccggcccccttctatgctatggactactggggtcaaggaacctcagtcaccgtctcctcagccaaaacgacacccccatctgtctatccactggcccctggatctgctgcccaaactaactccatggtgaccctg…
	F91gch1_MsVHE	Musmus IGHV14-3*02 F	M	0	0	0	3	0	3	1	0	1	1	1	0	5	Musmus IGHJ4*01 F	Musmus IGHD3-3*01 F	2	8.8.13	[12.17.38.11]	CARGVRLGYYSMAYW	in-frame	+	gagcaggggcctcagtcaagttgtcctgcacagcttctggcttcaacattaaagacacctatatgcactgggtgaagcagtggcctgaacagggcctggactggattgaaaggattgatcctgcgaatgataatactaaatatgacccgaagttccagggcaaggccactataacagcagacacatcctccaacactgcctacctgcagctcagcagcctgacatctgaggacactgccgtctattactgtgctagaggggtacgcctaggttactattctatggcctactggggtcaaggaacctcagtcaccgtctcctcagagagtcagtccttcccaaatgtccttccac
	F91gce3_MsVHE	Musmus IGHV14-4*02 F	G2B	1	0	1	0	0	0	0	0	0	1	0	1	2	Musmus IGHJ2*01 F	Musmus IGHD2-14*01 F	3	8.8.14	[13.17.38.11]	CCLYRYDAEGSYFDYW	in-frame	+	gaggtaggggcctcagtcaagttgtcctgcacagcttctggcttcaacattaaaaactactatatgcactgggtgaagcagaggcctgaacagggcctggagtggattggatggattgatcctgagaatggtgatactgaatatgccccgaagttccagggcaaggccactatgactgcagacacatcctccaacacagcctacctgcacctcagcagcctgacatctgaggacactgccgtctattactgttgtctttataggtacgacgcggaggggtcctactttgactactggggccaaggcaccactctcgcagtctcctcagccaaaacaacacccccatcagtctatccactggcccctgggtgtggagatacaactggttcctccgtgact…
	F91gcc3_MsVHE	Musmus IGHV1S137*01 [F]	G1	1	1	0	2	1	1	5	0	5	5	2	3	13	Musmus IGHJ2*01 F			8.8.11	[15.17.38.11]	CARFHYYGYFDYW (see Functionality comment)	in-frame	+	agctggtgaggcctggggtctcagtgaagatttcctgcaagggttccggctacacattcactgattatgccatgcactgggtgaagcagagtcatgcaaagactctagagtggattggagtcattagtactgactctggtaatacaaactacaaccagaagtttaagggcaaggccacaatgactgtagacaaatcctccagcacagcctatatggaacttgccagattgacatctgaggattctgccatctattactgtgcaagatttcattactacggctactttgactactggggccaaggcaccactctcacagtctcctcaaccaaaacgacacccccatctgtctatccactggcccctggatctgctgcccaaactaactccatggtgaccc…
	F91gcd2_MsVHE	Musmus IGHV2-2*02 F	G1	2	0	2	0	0	0	0	0	0	3	1	2	5	Musmus IGHJ4*01 F	Musmus IGHD1-1*02 F	3	8.7.15	[12.17.38.11]	CARKGINHDGYYTMDYW	in-frame	+	agccctcacagagcctgtccatcacctgcacagtctctggtttctcattaagtacctatggtgtacactgggttcgccagtctccaggaaagggtctggagtggctgggagtgatatggagtggtggaagcacagactataatgcaggtttcatatccagactgagcatcagcaaggacaattccaagagccaagttttctttaaaatgaacagtctgcaaggtaatgacacagccatatattattgtgccagaaaaggtattaatcacgatggatactatactatggactactggggtcaaggaacctcagtcaccgtctcctcagccaaaacgacacccccatctgtctatccactggcccctggatctgctgcccaaactaactccatggtgaccc…
	F91gcb3_MsVHE	Musmus IGHV5-9-4*01 F	G1	0	0	0	1	0	1	1	0	1	2	1	1	4	Musmus IGHJ2*01 F (see comment)	Musmus IGHD1-1*01 F	1	8.8.7	[14.17.38.11]	CARANWDYW	in-frame	+	tagtgagcctggagggtccctgaactctcctgtgcagcctctggattcactttcagtagctatgccatgtcttgggttcgcctgtctccagagaagaggctggagtgggtcgcagaaattagtagtggtggtggttacacctactatccagacactgtgccgggccgattcaccatctccagagacaatgccaagaacaccctgtacctggaaatgagcagtctgaggtctgaggacacggccatgtattattgtgcaagagctaactgggactactggggccaaggcaccactctcacagtctcctcagccaaaacgacacccccatctgtctatccactggcccctggatctgctgcccaaactaactccatggtgaccctgggatgcctggtcaag…
	F92gcd2_MsVHE	Musmus IGHV1-26*01 F	G1	5	2	3	4	0	4	1	0	1	8	3	5	18	Musmus IGHJ2*01 F (see comment)	Musmus IGHD2-14*01 F	2	8.8.11	[15.17.38.11]	CARGEVRRPFDYW	in-frame	+	cctggtgagcctggggcttcagtgaagatatcctgcatggcttctggttactcattcactggctactatatacactgggtgaagcagagccatggaaagagccttgagtggattggacgtattaatcctgacaatggtggtactacctacaaccagaggttcaagggcaaggccatattaactgtagacaagtcatccaacgcagcctacatggagctccgcagcctgacatctgaggactctgcggtctattactgtgcaaggggggaggttcgacggccttttgactactggggccaaggcaccactctcacagtctcctcagccaaaacgacacccccatctgtctatccactggcccctggatctgctgcccaaactaactccatggtgaccctg…
	F92gcf1_MsVHE	Musmus IGHV1-26*01 F	G1	5	1	4	5	1	4	1	0	1	6	1	5	17	Musmus IGHJ2*01 F	Musmus IGHD3-1*01 F	1	8.8.11	[14.17.38.11]	CAREGATDYFDYW	in-frame	+	tggtgagcctggggcttcagtgaagatatcctgcaaggcttctggttactcattcactgtctacgacatgcactgggtgaagcaaagccatgtaaagagccttgagtggattggacgtattaatccttacaatggtggtactagctacaaccagaatttcaaggacaaggccagcttgactgtagataagtcctccagcacagcctacatggagctccacagcctgacatctgaggactctgcagtctattactgtgcaagagagggggctacggactactttgactactggggccaaggcaccactctcacagtctcctcagccaaaacgacacccccatctgtctatccactggcccctggatctgctgcccaaactaactccatggtgaccctggg…
	F92gcf3_MsVHE	Musmus IGHV1-34*01 F	M	3	1	2	2	0	2	5	0	5	8	4	4	18	Musmus IGHJ2*01 F (see comment)	Musmus IGHD2-14*01 F	2	8.8.11	[14.17.38.11]	CARGEVRRPFDYW	in-frame	+	tggtgagcctggggcttcagtgaagatatcctgccaggcttctggttactcattcactggctactacatgcactgggtgaagcagagccatggaaagagccttgagtggattggacgtgttaatcctgacaatggtgttactgtctacaaccagaagttcaagggcaaggccatattaactgtagacaagtcattcagcacagcctacatggagctccgtagcctgacatctgaggactctgcggtctatttctgtgcaaggggggaggtacgacggccttttgactactggggccaaggcaccactctcacagtctcttcagagagtcagtccttcccaaatgtcttcccccacaa
	F92gch2_MsVHE	Musmus IGHV1-37*01 F	M	3	2	1	0	0	0	1	0	1	2	0	2	6	Musmus IGHJ3*01 F	Musmus IGHD1-2*01 F	3	8.8.11	[15.17.38.11]	CGREHHYGWFVYW	in-frame	+	gactggtgagcctggggcttcagtgaagatatcctgcaaggcttctggttattcatttactgactattttatgaactgggtgaagcagagccatggaaagagccttgagtggattggacgtgttaatccttacaatggtgatactttctacaaccagaagttcaaggacaaggccacattgactgtagacaaatcctctagcacagcccacatggagctcctgagcctgacatctgaggactctgcagtctattattgtggaagagagcatcactacggctggtttgtttactggggccaagggactctggtcactgtctctgcagagagtcagtccttcccaaatgtctttcca
	F92gcd1_MsVHE	Musmus IGHV1-4*01 F, or Musmus IGHV1-7*01 F	G1	4	0	4	3	1	2	3	0	3	5	0	5	15	Musmus IGHJ2*01 F	Musmus IGHD1-2*01 F	3	8.8.9	[8.17.38.11]	CARWYYGLDSW	in-frame	+	cagtgaagatgtcctgcaaggcttctggctacacctttactagacactggattcactgggtaaaacagaggcctggacagggtctggaatggattgggttcattaatcctaccactgattatactgagtacaatcagaagttcaaggacagggccacattgactgcagacaaatcctccagcacagcctacatgcttctgagcagcctgacatctgaggactctgcactctattactgtgcaagatggtactacggccttgactcctggggccaaggcaccactctcacagtctcctcagccaaaacgacacccccatctgtctatccactggcccctggatctgctgcccaaactaactccatggtgaccctgggatgcctggtcaagggtt
	F92gcb1_MsVHE	Musmus IGHV14-3*02 F	G3	0	0	0	1	0	1	1	0	1	2	0	2	4	Musmus IGHJ4*01 F	Musmus IGHD1-1*01 F	3	8.8.12	[12.17.38.11]	CARSRYGSSLMDYW	in-frame	+	gagcaggggcctcagtcaagttgtcctgcacagcttctggcttcaacattaaagacacctatatgcactgggtgaagcagaggcctgaacagggcctggactggattggaaggattgatcctgcgaatggtcatactaaatatgacccgaacttccagggcaaggccgctataacagcagacacatcctccaacacagcctacctgcagctcagcagcctgacatctgaggacactgccgtctattactgtgctagatcgcgatacggtagtagccttatggactactggggtcaaggaacctcagtcaccgtctcctcagctacaacaacagccccatctgtctatcccttggtccctggctgcagtgacacatctggatcctcggtgacactgggat…
	F92gcb3_MsVHE	Musmus IGHV14-4*02 F	M	0	0	0	2	1	1	0	0	0	1	0	1	3	Musmus IGHJ2*01 F	Musmus IGHD3-3*01 F	1	8.8.12	[14.17.38.11]	CNAWPARAPYFDYW	in-frame	+	gtgaggtcaggggcctcagtcaagttgtcctgcacagcttctggcttcaacattaaagactactatatacactgggtgaaacagaggcctgaacagggcctggagtggattggatggattgatcctgagaatggtgatactgaatatgccccgaagttccagggcaaggccactatgactgcagacacatcctccaacacagcctacctgcagctcaacagcctgacatctgaggacactgccgtctattactgtaatgcatggccagctcgggctccctactttgactactggggccaaggcaccactctcacagtctcctcagagagtcagtccttcccaaattcctt
	F92gcg2_MsVHE	Musmus IGHV14-4*02 F	G1	1	1	0	3	1	2	0	0	0	2	0	2	6	Musmus IGHJ4*01 F	Musmus IGHD4-1*01 F	2	8.8.9	[15.17.38.11]	CNALLNTMDYW	in-frame	+	agcttgtgaggtcaggggcctcagtcaagttgtcctgcacaccttctggcttcaacattaaagactattatatacactgggttaagcagaggcctgaacagggcctggagtgcattggatggattgatcctgagaatggtgatactgattatgccccgaagttccagggcaaggccactatgactgcagacacatcctccaacacagccaacctgcagctcagcagcctgacatctgaggacactgccgtctattactgtaatgccttactgaatactatggactactggggtcaaggaacctcagtcaccgtctcctcagccaaaacgacacccccatctgtctatccactggcccctggatctgctgcccaaactaactccatggtgaccctgggat…
	F92gch3_MsVHE	Musmus IGHV1S16*01 P	M	2	0	2	3	0	3	0	0	0	6	1	5	11	Musmus IGHJ3*01 F	Musmus IGHD2-10*02 F	3	8.8.11	[14.17.38.11]	CTRSGYGNYVAYW	in-frame	+	tggtgagcctggggcttcagtgaagttgtcctgcaaggcttctggctacaccttcaccagctactatatgtactgggtgaagcagaggcctggacaaggccttgagtggattggagagattaatcctagcaatggtggtactaacttcaatgagaagttcaagagcaaggccgcactgactgaagacaaatcctccagcacagcatacatgcaactcagcagcctgacatctgatgactctgcggtctattactgtacaagatcggggtatggtaactacgttgcttactggggccaagggactctggtcactgtctctgcagagagtcagtccttcccaaatgcctttc
	F92gca1_MsVHE	Musmus IGHV1S30*02 F	G1	1	0	1	7	2	5	1	0	1	16	3	13	25	Musmus IGHJ2*01 F (see comment)	Musmus IGHD1-3*01 F	3	8.8.9	[15.17.38.11]	CARGTPYFDYW	in-frame	+	gagctggtgagcctggggcttcagtgaagatatcctgcaaggcttctggttactcattcactgtctactacatgcactgggtgaagcaaagtcatgttaagagccttgagtggattggacgtattaatccttacaatggtgctactaactacaaccagaatttcaacgacagggccagcttgactgtgaatacgtcctccagcacagcctccatggagctccacagcctgacatctgaggactctgcagtctattactgtgcaagagggaccccatactttgattattggggccaaggcaccactctcacagtctcctcagccaaaacgacacccccatctgtctatccactggcccctggatctgctgcccaaactaactccatggtgaccctgggat…
	F92gca3_MsVHE	Musmus IGHV2-6*03 F, or Musmus IGHV2-6-2*01 F	G2B	1	0	1	0	0	0	0	0	0	2	0	2	3	Musmus IGHJ4*01 F	Musmus IGHD2-3*01 F	3	8.7.14	[12.17.38.11]	CARHNGNCPYYVMDYW	in-frame	+	gcgcctcacagagcctgtccatcacatgcaccgtctcagggttctcattaaccaactatggtgtacactgggttcgccagcctccaggaaagggtctggagtggctggtagtgatatggagtgatggaagcacatcctataattcagctctcaaatccagactgagcatcagcaaggacaactccaagagccaagttttcttaaaagtgaacagtctccaaactgatgacacagccatgtactactgtgccagacataatggtaactgcccttactatgttatggactactggggtcaaggaacctcagtcaccgtctcctcagccaaaacaacacccccatcagtctatccactggcccctgggtgtggagatacaactggttcctccgtgactctgg…
	F92gcf2_MsVHE	Musmus IGHV2-6*03 F, or Musmus IGHV2-6-2*01 F	G2B	2	1	1	0	0	0	1	0	1	3	0	3	6	Musmus IGHJ4*01 F	Musmus IGHD2-3*01 F	3	8.7.14	[11.17.38.11]	CARHNGNYPYYVMDYW	in-frame	+	tcacagagcctgtccatcacatgcaccgtctcaggtttctcattaaccaactatggtgtacactgggttcgccagcctccaggaaagggtctggagtggctggtagtgatatggagtgatggaatcacatcctataattcagctctcaaatccagactgagcatcagcaaggacaactccaagagccaaattttcttaaaagtgaacagtctccaaactgatgacacagccatgtactactgtgccagacataatggtaactacccttactatgttatggactactggggtcaaggaacctcagtcaccgtctcctcagccaaaacaacacccccatcagtctatccactggcccctgggtgtggagatacaactggttcctccgtgactctgggatgc…
	F92gca2_MsVHE	Musmus IGHV3-2*02 F	M	0	0	0	0	0	0	0	0	0	1	1	0	1	Musmus IGHJ2*01 F (see comment)	Musmus IGHD2-3*01 F	3	9.7.12	[11.17.38.11]	CARDDDYDVPFDYW	in-frame	+	ttctcagtctctgtccctcacctgcactgtcactggctactcaatcaccagtgattatgcctggaactggatccggcagtttccaggaaacaaactggagtggatgggctacataagctacagtggtagcactagctacaacccatctctcaaaagtcgaatctctatcactcgagacacatccaagaaccagttcttcctgcagttgaattctgtgactactgaagacacagccacatattactgtgcaagagatgatgattacgacgtaccctttgactactggggccaaggcaccactctcacagtctcctcagagagtcagtccttcccaaatgtcttcccccaga
	F92gcd3_MsVHE	Musmus IGHV3-2*02 F	M	0	0	0	0	0	0	0	0	0	0	0	0	0	Musmus IGHJ1*01 F	Musmus IGHD1-2*01 F	2	9.7.13	[12.17.38.11]	CARLDILRLRYFDVW	in-frame	+	accttctcagtctctgtccctcacctgcactgtcactggctactcaatcaccagtgattatgcctggaactggatccggcagtttccaggaaacaaactggagtggatgggctacataagctacagtggtagcactagctacaacccatctctcaaaagtcgaatctctatcactcgagacacatccaagaaccagttcttcctgcagttgaattctgtgactactgaggacacagccacatattactgtgcaagattggatatactacggctacgatatttcgatgtctggggcgctgggaccacggtcaccgtctcctcagagagtcagtccttcccaaatgtcttcccca
	F93gcg1_MsVHE	Musmus IGHV1-18*01 F	G1	1	1	0	0	0	0	4	1	3	3	1	2	8	Musmus IGHJ4*01 F	Musmus IGHD2-1*01 F	3	8.8.11	[13.17.38.11]	CGRFGNYGAMDYW	in-frame	+	gtgagcctggggcttcagtgaagatatcctgcaaggcttctggctacacattcactgactacaacatggactgggtgaagcagagccatggaaagagccttgagtggattggagatattgatcctaataatgatagtactacctacaaccagaagttcaagggaaaggccacattgactgtagacaagtcctccagcacagcctacatggagctccgcagcctgacatctgaggacagtgcagtctattactgtggaagattcggtaactacggggctatggactactggggtcaaggaacctcagtcaccgtctcctcagccaaaacgacacccccatctgtctatccactggcccctggatctgctgcccaaactaactccatggtgaccctgggat…
	F93gce2_MsVHE	Musmus IGHV1-20*01 F, or Musmus IGHV1-37*01 F	G1	4	1	3	4	1	3	1	0	1	10	6	4	19	Musmus IGHJ3*01 F	Musmus IGHD1-1*01 F	3	8.8.10	[9.17.38.11]	CARNYGSPFAYW	in-frame	+	acttcatgaagatatcctgcaaggcttctggttactcattcactgactacatcatgaattgggtgaagcagagccatggaaagaaccttgagtggattggacttattaatccttaccatggtgatacttactacaaccagaagttcaagggcaaggccacattaactgtagacaagtcatccagcacagcctacatggagctcctcagtctgacatctgaggactctgcagtctattactgtgcaagaaactacggtagtccgtttgcttactggggccaagggactctggtcactgtctctgcagccaaaacgacacccccatctgtctatccactggcccctggatctgctgcccaaactaactccatggtgaccctgggatgcctggtcaagggct…
	F93gce1_MsVHE	Musmus IGHV1S127*01 [F]	M	3	1	2	4	3	1	3	1	2	10	4	6	20	Musmus IGHJ4*01 F			8.8.12	[14.17.38.11]	CTRGELGTGAVDYW (see Functionality comment)	in-frame	+	tggttaggcctggggcttcagtgaagatatcctgcaaggcttctggttactctttcaccagctactggatgcactgggtgaagcagaggcctggacaaggtcttgagtggattggcatgattgatccttccgatagtgaaactaggttaaatcagaaattcaaggacaaggccacattgactgtagacagatcctccagcacagcctacatgcaactcagcagcccgacatctgaggactctgcggtctattactgtacaagaggggagttggggacgggggctgtggactactggggtcaaggaacctcagtcaccgtctcctcagagagtcagtccttcccaaatgtcttccccctcaa
	F93gcb1_MsVHE	Musmus IGHV2-5*01 F, or Musmus IGHV2-5-1*01 F	G1	2	0	2	2	1	1	1	0	1	2	0	2	7	Musmus IGHJ4*01 F	Musmus IGHD1-1*01 F	3	8.7.15	[12.17.38.11]	CAPWYGSSPYFYAMDYW	in-frame	+	agccctcacagagcctgtccataacctgcacagtctctggtttctcattaactagctgtgatatacactgggttcgccagtctccaggaaagggtctggagtggctgggtgtgatgtggagaggtggaagcacagactacaatgcagctttcatgtccagactgagcatcaccaaggacaactccaagagccaagttttctttaaaatgaacaatctgcaagttgatgacactgccatatactactgtgccccttggtacggtagtagcccttatttctatgctatggactactggggtcaaggaacctcagtcaccgtctcctcagccaaaacgacacccccatctgtctatccactggcccctggatctgctgcccaaactaactccatggtgaccc…
	F93gca1_MsVHE	Musmus IGHV2-6-7*01 F, or Musmus IGHV2-6-7*02 F	M	0	0	0	1	0	1	2	1	1	3	1	2	6	Musmus IGHJ4*01 F			8.7.6	[11.17.38.11]	CARAMDYW	in-frame	+	cctcacagagcctgtccatcacatgcaccgtctcagggttctcattaaccggctatggtgtaaactgggttcgccagcctccaggaaaggctctggagtggctgggaatgatctggggtgatggaaacacagactataattcagctctcgaatccagactgagcatcagcaaggacaactccaggagccaagttttcttaaaaatgaacagtctgcaaactgatgacacagccaggtactattgtgccagagccatggactactggggtcaaggaacctcagtcaccgtctcctcagagagtcagtccttcccaaatgtcttcccca
	F93gca2_MsVHE	Musmus IGHV2-9*02 F	M	1	1	0	1	0	1	2	1	1	1	0	1	5	Musmus IGHJ4*01 F	Musmus IGHD1-1*02 F	3	8.7.10	[15.17.38.11]	CARDYDGAMGYW	in-frame	+	ctggtgacgccctcacagagcctgtccatcacttgcactgtctctgggttttccttaaccagctatggtgtacactgggttcgccagcctccaggacagggtctggagtggctgggagtaatttgggctggtggaatcacatattataattcggctctcatgtccagactgagcatcagcaaagacaactccaagagccaagttttcttaaaaatgaacagtctgcaaactgatgacacagccatgtactactgtgccagagattacgatggggctatgggctactggggtcaaggaacctcagtcaccgtctcctcagagagtcagtccttcccaaatgtcttcccccac
	F93gcd1_MsVHE	Musmus IGHV2-9*02 F	M	2	1	1	1	0	1	2	1	1	1	0	1	6	Musmus IGHJ4*01 F	Musmus IGHD1-1*02 F	3	8.7.10	[15.17.38.11]	CARDYDGAMGYW	in-frame	+	actggtggcgccctcacagagcctgtccatcacttgcactgtctctgggttttccttaaccaactatggtgtacactgggttcgccagcctccaggaaagggtctggagtggctgggaataatttgggctggtggaaacacatattataattcggctctcatgtccagactgagcatcagcaaagacaactccaagagccaagttttcttaaaaatgaacagtctgcaaactgatgacacagccatgtactactgtgccagagattacgatggggctatgggctactggggtcaaggaacctcagtcaccgtctcctcagagagtcagtccttcccaaatgtcttccccct
	F93gch2_MsVHE	Musmus IGHV3-2*02 F	G1	0	0	0	1	0	1	0	0	0	4	1	3	5	Musmus IGHJ2*01 F	Musmus IGHD3-1*01 F	1	9.7.9	[12.17.38.11]	CARWAYYFDYW	in-frame	+	gaccttctcagtctctgtccctcacctgcactgtcactggctactcaatcaccagtgattatgcctggaactggatccggcagtttccaggaaacaaactggagtggatgggccacataagctacagtggtagcactagctacaacccatctctcacaagtcgcatctctatcactcgagacacatccaagaaccagatcttcctgcagttgaattctctgactactgaggacacagccacatattactgtgcaagatgggcctactactttgactactggggccaaggcaccactctcacagtctcctcagccaaaacgacacccccatctgtctatccactggcccctggatctgctgcccaaactaactccatggtgaccctgggatgcctggtca…
	F93gcd2_MsVHE	Musmus IGHV3-8*02 F	G1	0	0	0	0	0	0	1	1	0	1	1	0	2	Musmus IGHJ4*01 F	Musmus IGHD3-3*01 F	2	8.7.12	[14.17.38.11]	CARRGTLGYAMDYW	in-frame	+	tcgtgaccttctcagactctgtccttcacctgttctgtcactggcgactccatcaccagtggttactggaactggatccggaaattcccagggaataaacttgagtacatggggtacataagctacagtggcagcacttactacaatccatctctcaaaagtcgaatctccatcactcgagacacatcaaagaaccagtactacctgcagttgaattctgtgactactgaggacacagccacatattactgtgcaagacgggggaccctaggatatgctatggactactggggtcaaggaacctcagtcaccgtctcctcagccaaaacgacacccccatctgtctatccactggcccctggatctgctgcccaaactaactccatggtgaccctggga…
	F93gcc2_MsVHE	Musmus IGHV4-1*02 F	M	0	0	0	0	0	0	1	0	1	0	0	0	1	Musmus IGHJ3*01 F	Musmus IGHD2-4*01 F	3	8.8.15	[13.17.38.11]	CARPAYDYDEGGWFAYW	in-frame	+	tggtgagcctggaggaccctgaactctcctgtgcagcctcaggattcgattttagtagatactggatgagttgggtccggcaggctccagggaaagggctagaatggattggagaaattcatccagatagcagtacgataaactatacgccatctctaaaggataaattcatcatctccagagacaacgccaaaaatacgctgtacctgcaaatgagcaaagtgagatctgaggacacagccctttattactgtgcaagaccggcttatgattacgacgagggggggtggtttgcttactggggccaagggactctggtcactgtctctgcagagagtcagtccttcccaaatgcctttc
	F93gcd3_MsVHE	Musmus IGHV5-17*02 F	G1	0	0	0	0	0	0	1	0	1	2	0	2	3	Musmus IGHJ4*01 F	Musmus IGHD3-3*01 F	3	8.8.11	[13.17.38.11]	CARSGWDRAMEYW	in-frame	+	agtgagcctggagggtcccggaactctcctgtgcagcctctggattcactttcagtagctttggaatgcactgggttcgtcaggctccagagaaggggctggagtgggtcgcatacattagtagtggcagtaataccatctactatgcagacacagtgatgggccgattcaccatctccagagacaatcccaagaacaccctgttcctgcaaatgaccagtctaaggtctgaggacacggccatgtatcactgtgcaagatcggggtgggacagggctatggaatactggggtcaaggaacctcagtcaccgtctcctcagccaaaacgacacccccatctgtctatccactggcccctggatctgctgcccaaactaactccatggtgaccctgggat…
	F93gcc3_MsVHE	Musmus IGHV5-6*01 F, or Musmus IGHV5-6*02 [F] or Musmus IGHV5-6*03 [F] or Musmus IGHV5-6-1*01 F	G1	0	0	0	0	0	0	1	1	0	3	0	3	4	Musmus IGHJ4*01 F	Musmus IGHD2-4*01 F	3	8.8.14	[14.17.38.11]	CARHYYDYDKDGMDYW	in-frame	+	tagtgagcctggagggtccctgaactctcctgtgcagcctctggattcactttcagtagctatggcatgtcttgggttcgccagactccagacaagaggctggagtgggtcgcaaccattagtagtggtggtagttatacctactatccagacaatgtgaaggggcgattcaccatctccagagacaatgccaagaacaccctgtacctgcaaatgagcagtctgaagtctgaggacacagccatgtatttttgtgcaagacactactatgattacgacaaggatggtatggactactggggtcaaggaacctcagtcaccgtctcctcagccaaaacgacacccccatctgtctatccactggcccctggatctgctgcccaaactaactccatggtg…
	F93gcg2_MsVHE	Musmus IGHV5-6*01 F, or Musmus IGHV5-6*02 [F] or Musmus IGHV5-6*03 [F] or Musmus IGHV5-6-1*01 F	G1	0	0	0	0	0	0	0	0	0	5	0	5	5	Musmus IGHJ4*01 F	Musmus IGHD1-1*01 F	1	8.8.14	[15.17.38.11]	CTRHATHTVGDALDYW	in-frame	+	acttagtgagcctggagggtccctgaactctcctgtgcagcctctggattcactttcagtagctatggcatgtcttgggttcgccagactccagacaagaggctggagtgggtcgcaaccattagtagtggtggtagttacaccttctatccagacagtgtgaaggggcgattcaccatctccagaaacaagtccaagaacaccctgtacctgcaaatgaccagtctgaagtctgaggacacagccatgtattactgtacaagacatgcgacccatacggtaggggatgctttggactactggggtcaaggaacctcagtcaccgtctcctcagccaaaacgacacccccatctgtctatccactggcccctggatctgctgcccaaactaactccatg…
E3 boost day 7	Sequence ID	V-GENE and allele	Isotype	CDR1T	CDR1S	CDR1R	FR2T	FR2S	FR2R	CDR2T	CDR2S	CDR2R	FR3T	FR3S	FR3R	Tot Mut	J-GENE and allele	D-GENE and allele	D-REGION reading frame	CDR-IMGT lengths	FR-IMGT lengths	AA JUNCTION	JUNCTION frame	Orientation	Sequence
	F61gca2_MsVHE	Musmus IGHV1-12*01 F	M	0	0	0	3	0	3	0	0	0	5	3	2	8	Musmus IGHJ3*01 F	Musmus IGHD2-1*01 F	1	8.8.9	[17.17.38.11]	CARGTSWFAYW	in-frame	+	ggctgagctggtgagcctggggcctcagtgaagatgtcctgcaaggcttctggctacacatttaccagttacaatttgcactgggtaaagcagacacctggacagggcctggaatggattggacctatttatccaggaaatggtgatacttcctacaatcagaagttcaaaggcaaggccacattgactgcagacaaatcctccagcacagcctacatgcagctcagcagcctgacatctgaggactctgcggtctattactgtgcaaggggaacttcctggtttgcttactggggccaagggactctggtcactgtctctgcagagagtcagtccttcccaaatgtcttccccct
	F61gcd2_MsVHE	Musmus IGHV1-14*01 F	M	1	0	1	0	0	0	1	0	1	3	0	3	5	Musmus IGHJ4*01 F	Musmus IGHD3-3*01 F	2	8.8.10	[14.17.38.11]	CARGGHYAMDYW	in-frame	+	ggtaagcctggggcttcagtgaagatgtcctgcaaggcttctggatacacattcactagctatcttatgcactgggtgaagcagaagcctgggcagggccttgagtggattggatatattaatccttacaatgatggtactaagtacaatgagaagttcaaaggcaaggccacactgacttcagacaaatcctccagcacagtctacatggagttcaggagcctgacctctgaggactctgcggtctattactgtgcaagagggggacactatgctatggactactggggtcaaggaacctcagtcaccgtctcctcagagagtcagtccttcccaaatgtcttccccc
	F61gcb2_MsVHE	Musmus IGHV1-37*01 F	M	1	1	0	1	1	0	0	0	0	2	0	2	4	Musmus IGHJ2*01 F (see comment)	Musmus IGHD1-1*01 F	1	8.8.10	[14.17.38.11]	CGRETVVATDYW	in-frame	+	tggtgagcctggggcttcagtgaagatatcctgcaaggcttctggttactcatttactggctattttatgaactgggtgaaacagagccatggaaagagccttgagtggattggacgtattaatccttacaatggtgatactttctacaaccagaagttcaagggcaaggccacattgactgtagacaaatcctctagcacagcccacatggagctcctgagcctgacatctgaggactctgcactctattattgtggaagagagacggtagtagctacggactactggggccaaggcaccactctcacagtctcctcagagagtcagtccttcccaaattcttcc
	F61gce1_MsVHE	Musmus IGHV1-55*01 F	M	1	1	0	2	0	2	2	0	2	2	1	1	7	Musmus IGHJ2*01 F	Musmus IGHD1-1*02 F	3	8.8.10	[13.17.38.11]	CSRGGPYYFDYW	in-frame	+	gtgagcctggggcttcagtgaaatgtcctgcaaggcttctggctacaccttcactagctactggataaactgggtgaagcagaggcctggacaaggccttgagtggattagagatatttatcctggtagaggtattactaactacaatgagaagttcaagagcaaggccacactgactctagacacatcctccagcacagcctacatgcagctcagcagcctgacatctgaggactctgcggtctattattgttcaagggggggtccgtactactttgactactggggccaaggcaccactctcacagtctcctcagagagtcagtccttcccaaatgtcttcccccacagt
	F61gcf1_MsVHE	Musmus IGHV1-62-2*01 F, or Musmus IGHV1-71*01 F	M	1	0	1	0	0	0	0	0	0	0	0	0	1	Musmus IGHJ4*01 F	Musmus IGHD2-1*01 F	3	8.8.16	[14.17.38.11]	CARHFYYGNYVLYAMDYW	in-frame	+	ctggtgaaccggggcatcagtgaagctgtcctgcaaggcttctggctacaccttcactgagtatattatacactgggtaaagcagaggtctggacagggtcttgagtggattgggtggttttaccctggaagtggtagtataaagtacaatgagaaattcaaggacaaggccacattgactgcggacaaatcctccagcacagtctatatggagcttagtagattgacatctgaagactctgcggtctatttctgtgcaagacacttctactatggtaactacgtcctctatgctatggactactggggtcaaggaacctcagtcaccgtctcctcagagagtcagtccttcccaaatgtcttccccctcat
	F61gcb5_MsVHE	Musmus IGHV1S16*01 P	M	2	0	2	3	0	3	2	0	2	3	1	2	10	Musmus IGHJ3*01 F	Musmus IGHD2-4*01 F	3	8.8.11	[13.17.38.11]	CTRSNYDYAFAYW	in-frame	+	gtgagcatggggcttcagtgaagttgtcctgcaaggcttctggctacaccttcaccagctactatatgtactgggtgaagcagaggcctggacaaggccttgagtggattggagagattaatcctaacaatgttggtactaacttcaatgagaagttcaagagcaaggccacactgactgtagacaaatcctccagcacagcatacatgcaactcagcagcctgacatctgaggactctgcggtctattactgtacaagatcaaactatgattacgcctttgcttactggggccaagggactctggtcactgtctctgcagagagtcagtccttcccaaatgtccttccccctcat
	F61gcc1_MsVHE	Musmus IGHV1S16*01 P	M	2	0	2	6	1	5	1	0	1	6	1	5	15	Musmus IGHJ3*01 F	Musmus IGHD1-1*01 F	3	8.8.12	[13.17.38.11]	CTRDGSDGSPFAYW	in-frame	+	tgagcctggggcttcagtgaagttgtcctgcaaggcttctggctacaccttcaccagctactatatgtactgggtgaagcagacgcctggacaaggccttgagtggattggggggattaatcctagcaatggtggtattaacttcaatgagaagttcaagaacaaggccacacagactgtagacaaatcctccagcaccgcctacatgcaactcagcagcctgacatctgaggactctgtggtctattactgtacaagagatgggtcggacggtagtccgtttgcttactggggccaagggactctggtcactgtctctgcagagagtcagtccttcccaaatgtcttccccctcagg
	F61gcd1_MsVHE	Musmus IGHV1S16*01 P	G3	3	1	2	3	0	3	1	1	0	5	2	3	12	Musmus IGHJ4*01 F	Musmus IGHD2-3*01 F	2	8.8.11	[13.17.38.11]	CTRSGFTYTMDYW	in-frame	+	gtgagcctggggcttcagtgaagttgtcctgcaaggcttctggctacaccttcaccagttactatatgtactgggtgaagaagaggcctggacaaggccttgagtggattggagagattaatcctagcaatggtggcactaacttcaatgagaagttcaagagcaaggccacactgactgcagacaaatcctccagtacagcatacatgcaactcagcagcctgacatctgaggactctgcggtctattactgtacaagatcagggtttacctatactatggactactggggtcaaggaacctcagtcaccgtctcctcagctacaacaacagccccatctgtctatcccttggtccctggctgcagtgacacatctggatcctcggtgacactgggat…
	F61gcd5_MsVHE	Musmus IGHV1S16*01 P	M	2	0	2	3	0	3	0	0	0	4	2	2	9	Musmus IGHJ3*01 F	Musmus IGHD2-2*01 F	3	8.8.11	[14.17.38.11]	CTRSPYGYLFAYW	in-frame	+	tggtgagcctggggcttcagtgaagttgtcctgcaaggcttctggctacaccttcaccagctactatatgtactgggtgaagcagaggcctggacaaggccttgagtggattggagagattaatcctagcaatggtggtactaatttcaatgagaagttcaagagtaaggccacactgactgtagacaaatcctccagcacagcatacatgcaactcagcagcctgacatctgaggactctgcggtctattactgtacaagatccccttatggttacctttttgcttactggggccaagggactctggtcactgtctctgcagagagtcagtccttcccaaatgtcttcc
	F61gca5_MsVHE	Musmus IGHV2-2*02 F, or Musmus IGHV2-2*03 F	G2A	0	0	0	0	0	0	0	0	0	1	0	1	1	Musmus IGHJ4*01 F	Musmus IGHD2-14*01 F	3	8.7.14	[12.17.38.11]	CAIYYRYDDYYVMDYW	in-frame	+	gccctcacagagcctgtccatcacctgcacagtctctggtttctcattaactagctatggtgtacactgggttcgccagtctccaggaaagggtctggagtggctgggagtgatatggagtggtggaagcacagactataatgcagctttcatatccagactgagcatcagcaaggacaattccaagagccaagttttctttaaaatgaacagtctgcaaactaatgacacagccatatattactgtgccatctactataggtacgacgattactatgttatggactactggggtcaaggaacctcagtcaccgtctcctcagccaaaacaacagccccatcggtctatccactggcccctgtgtgtggagatacaactggctcctcggtgactctagg…
	F61gcc5_MsVHE	Musmus IGHV2-9*02 F	M	1	1	0	2	0	2	0	0	0	3	0	3	6	Musmus IGHJ3*01 F	Musmus IGHD2-4*01 F	3	8.7.13	[15.17.38.11]	CAREDYDYDGGFAYW	in-frame	+	ctgatggcgccctcacagagcctgtccatcacttgcactgtctctgggttttccttaaccagctatggtgtacactggattcgccagcctccaggaaagggtctggagtggctgggattaatatgggctggtggaagcacaaattataattcggctctcatgtccagactgaccatcaccaaagacaactccaagagccaagttttcttaaaaatgaccagtctgcaaactgatgacacagccatgtactactgtgccagagaggactatgattacgacggggggtttgcttactggggccaagggactctggtcactgtctctgcagagagtcagtccttcccaaatgtcttccccc
	F61gca1_MsVHE	Musmus IGHV3-6*02 F	G1	0	0	0	0	0	0	1	0	1	0	0	0	1	Musmus IGHJ4*01 F	Musmus IGHD2-14*01 F	3	9.7.12	[12.17.38.11]	CARENYRYDAMDYW	in-frame	+	gagcttctcagtctctgtctctcacctgctctgtcactggctactccatcaccagtggttattactggaactggatccggcagtttccaggaaacaaactggaatggatgggctacataagctacgacggtaccaataactacaacccatctctcaaaaatcgaatctccatcactcgtgacacatctaagaaccagtttttcctgaagttgaattctgtgactactgaggacacagctacatattactgtgcaagagagaactataggtacgatgctatggactactggggtcaaggaacctcagtcaccgtctcctcagccaaaacgacacccccatctgtctatccactggcccctggatctgctgcccaaactaactccatggtgaccctgggat…
	F62gcb1_MsVHE	Musmus IGHV1-14*01 F	G2A	0	0	0	0	0	0	1	0	1	0	0	0	1	Musmus IGHJ1*01 F	Musmus IGHD1-1*01 F	2	8.8.16	[14.17.38.11]	CAR*GLLR**LSWYFDVW	in-frame	+	tggtaagcctggggcttcagtgaagatgtcctgcaaggcttctggatacacattcactagctatgttatgcactgggtgaagcagaagcctgggcagggccttgagtggattggatatattaatccttacaatgatggtactaagtacaatgagaagttcaaaggcaaggccacactgacttcagacaaatcctccagcacagcctacatggagctcagcagcctgacctctgaggactctgcggtctattactgtgcaagatgaggattactacggtagtagctttcctggtacttcgatgtctggggcgcagggaccacggtcaccgtctcctcagccaaaacaacagccccatcggtctatccactggcccctgtgtgtggagatacaactggctc…
	F62gcc1_MsVHE	Musmus IGHV1-18*01 F	G1	0	0	0	4	2	2	2	0	2	0	0	0	6	Musmus IGHJ4*01 F	Musmus IGHD2-1*01 F	3	1.8.11	[X.17.38.11]	CARNGNYYAMDYW	in-frame	+	aacatggactgggtgaaacagagccctggaaagagccttgaatggattggatatattaatcctaacactggtggttctatctacaaccagaagttcaagggcaaggccacattgactgtagacaagtcctccagcacagcctacatggagctccgcagcctgacatctgaggacactgcagtctattactgtgcaagaaatggtaactactatgctatggactactggggtcaaggaacctcagtcaccgtctcctcagccaaaacgacacccccatctgtctatccactggcccctggatctgctgcccaaactaactccatggtgaccctgggatgcctggtcaagggca
	F62gcc5_MsVHE	Musmus IGHV1-4*01 F, or Musmus IGHV1S26*01 F	M	1	1	0	1	1	0	0	0	0	3	1	2	5	Musmus IGHJ4*01 F	Musmus IGHD1-1*01 F	3	8.8.17	[13.17.38.11]	CATPIYYYDSSYGYAMDYW	in-frame	+	cagacctggggcctcagtgaagatgtcctgcaaggcttctggctacacctttactagttacacgatgcactgggtaaaacagaggcctggacagggtctagaatggattggatacattaatcctagcagtggttatactaattacaatcagaagttcaaggacaaggccacattgactgcagacaagccctccagcacagcctacatgcaactgagcagcctgacatctgaggactctgcagtctattactgtgcaacccctatttattactacgatagtagctacgggtatgctatggactactggggtcaaggaacctcagtcaccgtctcctcagagagtcagtccttcccaaattcttccc
	F62gcb5_MsVHE	Musmus IGHV10-1*02 F	M	0	0	0	0	0	0	0	0	0	1	0	1	1	Musmus IGHJ2*01 F (see comment)	Musmus IGHD3-3*01 F	2	8.10.7	[13.17.38.11]	CVRGNWDYW	in-frame	+	tgagcctaagggtcattgaaactctcatgtgcagcctctggattcaccttcaatacctacgccatgaactgggtccgccaggctccaggaaagggtttggaatgggttgctcgcataagaagtaaaagtaataattatgcaacatattatgccgattcagtgaaagacaggttcaccatctccagaaatgattcacaaagcatgctctatctgcaaatgaacaacttgaaaactgaggacacagccatgtattactgtgtgaggggaaactgggactactggggccaaggcaccactctcacagtctcctcagctacaacaacagcccca
	F62gcf1_MsVHE	Musmus IGHV10-1*02 F	M	0	0	0	0	0	0	0	0	0	0	0	0	0	Musmus IGHJ4*01 F	Musmus IGHD1-1*01 F	3	8.10.12	[13.17.38.11]	CVRPGRSYGAMDYW	in-frame	+	tgagcctaagggtcattgaaactctcatgtgcagcctctggattcaccttcaatacctacgccatgaactgggtccgccaggctccaggaaagggtttggaatgggttgctcgcataagaagtaaaagtaataattatgcaacatattatgccgattcagtgaaagacaggttcaccatctccagagatgattcacaaagcatgctctatctgcaaatgaacaacttgaaaactgaggacacagccatgtattactgtgtgagacccggacgtagctacggtgctatggactactggggtcaaggaacctcagtcaccgtctcctcagagagtcagtccttcccaaattccttc
	F62gcd2_MsVHE	Musmus IGHV14-3*02 F	M	0	0	0	0	0	0	1	0	1	1	0	1	2	Musmus IGHJ4*01 F	Musmus IGHD2-4*01 F	3	8.8.15	[12.17.38.11]	CARLGGYDYDYYAMDYW	in-frame	+	gagcaggggcctcagtcaagttgtcctgcacagcttctggcttcaacattaaagacacctatatgcactgggtgaagcagaggcctgaacagggcctggagtggattggaaggattgatcctgcgaatagtaatactaaatatgacccgaagttccagggcaaggccactataacagcagacacatcctccaacacagcctacctgcagctcagcagcctgacatctgaggacactgccgtctattcctgtgctagattggggggatatgattacgattactatgctatggactactggggtcaaggaacctcagtcaccgtctcctcagagagtcagtccttcccaaatgtccttcccc
	F62gca3_MsVHE	Musmus IGHV14-4*02 F	G3	0	0	0	2	0	2	0	0	0	1	0	1	3	Musmus IGHJ4*01 F	Musmus IGHD2-1*01 F	2	8.8.9	[12.17.38.11]	CNGLLGAMEYW	in-frame	+	ggtaggggcctcagtcaagttgtcctgcacagcttctggcttcaacattaaagactactatatacactgggtgaagcagaggcctgaacagggcctggactggattggatggattgatcctgagaatggtgatactgaatatgccccgaggttccagggcaaggccactatgactgcagacacatcctccaacacagcctacctgcagctcagcagcctgacatctgaggacactgccgtctattactgtaatggtctactgggggctatggaatactggggtcaaggaacctcagtcaccgtctcctcagctacaacaacagccccatctgtctatcccttggtccctggctgcagtgacacatctggatcctcggtgacactgggatgccttgtcaa…
	F62gch2_MsVHE	Musmus IGHV1S30*02 F	G3	0	0	0	5	1	4	2	0	2	12	2	10	19	Musmus IGHJ2*01 F (see comment)	Musmus IGHD1-1*01 F	1	8.8.9	[14.17.38.11]	CAPITTVGGHW	in-frame	+	tggtgagcctggggcttcagtgaagatatcctgcaaggcttctggttactcattcactggctactacatgcactgggtgaagcaaagccatgtaaagagccttgagtggattggacgcattaatccttacaatggtgctattaactacaaccagaatttcaaggacaaggccagcttgactgtagataagtcctccagcacagcctacatggagctccacagcctgacatctgaggactctgcagtctattactgtgcccctattactacggtaggtggccactggggccaaggcaccactctcacagtctcctcagctacaacaacagccccatctgtctatcccttggtccctggctgcagtgacacatctggatcctcggtgacactgggatgcct…
	F62gcf3_MsVHE	Musmus IGHV1S34*01 F	M	2	2	0	7	1	6	3	0	3	8	5	3	20	Musmus IGHJ3*01 F			8.8.14	[13.17.38.11]	CSR*GNLL*VRPFAYW (see Functionality comment)	in-frame	+	gtgatcagtggcttcagtgaagatatcctgcaaggcttctggttattcattcactggctactacaaacactgggtgaagcagggtcctagaaagagccttgagtggattggatatattagttgttacaatcgtattactagatataaccagaagttcaaaggcaaggccatatttactgtagacaaatcctccagcacagcctacatgcaattcaacagcctgacatctgaggactctgctgtctattactgttcaagatagggaaacctactataggtacgaccgtttgcttactgggtccaagggactctggtcactgtctctgcagagagtcagtccttcccaaatgtcttcccc
	F62gcg2_MsVHE	Musmus IGHV1S56*01 F	G1	4	1	3	1	0	1	2	0	2	5	2	3	12	Musmus IGHJ4*01 F			8.8.10	[14.17.38.11]	CARGYDRAMDYW (see Functionality comment)	in-frame	+	tgatgagcctggggcttcagtgaggatatcctgcaaggcttctggttacaccttcacaaactcctatatacactgggtgaggcagaggcctggacagggacttgagtggattggatggatttatcctggaaatgttaatactaactacaatgagaagttcaagggcaaggccacactgactgcagacaattcctccagcacagcctacatgcaactcagcagcctgacctctgaggactctgcggtctatttctgtgcaagaggatatgaccgggctatggactactggggtcaaggaacctcagtcaccgtctcctcagccaaaacgacacccccatctgtctatccactggcccctggatctgctgcccaaactaactccatggtgaccctgggatg…
	F62gca1_MsVHE	Musmus IGHV3-2*02 F	M	0	0	0	0	0	0	2	0	2	1	1	0	3	Musmus IGHJ2*01 F	Musmus IGHD2-14*01 F	3	9.7.13	[12.17.38.11]	CARHRYDRGYYFDYW	in-frame	+	gaacttctcagtctctgtccctcacctgcactgtcactggctactcaatcaccagtgattatgcctggaactggatccggcagtttccaggaaacaaactggagtggatgggctacataaactgcagtggtagcactagctacaacccatctctcaaaagtcgaatctctatcactcgagacacatccaagaaccagttcttcctgcagttgaattctgtgactactgaggacacagccacatattattgtgcaagacataggtacgacagggggtactactttgactactggggccaaggcaccactctcacagtctcctcagagagtcagtccttcccaaattccttcc
	F62gcc3_MsVHE	Musmus IGHV3-2*02 F	G1	0	0	0	0	0	0	0	0	0	1	0	1	1	Musmus IGHJ3*01 F, or Musmus IGHJ3*02 P			9.7.5	[14.17.38.11]	CALFVYW	in-frame	+	tgatgaccttctcagtctctgtccctcacctgcactgtcactggctactcaatcaccagtgattatgcctggaactggatccggcagtttccaggaaacaaactggagtggatgggctacataagctacagtggtagcactagctacaacccatctctcaaaagtcgaatctctatcattcgagacacatccaagaaccagttcttcctgcagttgaattctgtgactactgaggacacagccacatattactgtgccctctttgtttattggggccaagggactctggtcactgtctctgcagccaaaacgacacccccatctgtctatccactggcccctggatctgctgcccaaactaactccatggtgaccctgggatgcctggtcaagggcactt
	F62gcc2_MsVHE	Musmus IGHV5-17*02 F	M	0	0	0	0	0	0	1	0	1	0	0	0	1	Musmus IGHJ4*01 F	Musmus IGHD2-4*01 F	3	8.8.12	[13.17.38.11]	CALIYYEPYAMDYW	in-frame	+	agtgagcctggagggtcccggaactctcctgtgcagcctctggattcactttcagtagctttggaatgcactgggttcgtcaggctccagagaaggggctggagtgggtcgcatacattagtagtggcagtagtatcatctactatgcagacacagtgaagggccgattcaccatctccagagacaatcccaagaacaccctgttcctgcaaatgaccagtctaaggtctgaggacacggccatgtattactgtgcactgatctactatgagccctatgctatggactactggggtcaaggaacctcagtcaccgtctcctcagagagtcagtccttcccaaatgtcttccc
	F62gce1_MsVHE	Musmus IGHV5-9*02 F	M	1	0	1	3	1	2	2	1	1	1	1	0	7	Musmus IGHJ4*01 F	Musmus IGHD1-1*01 F	3	8.8.15	[13.17.38.11]	CARLDYYGSRSYTMDYW	in-frame	+	agtgagcctggagggtccctgaactctcctgtgcagcctctggattcgcttgcagtagctatgacatgtcttgggtacgccagactccggagaagaggctggagtgggtcgcaagtataagtagtggtggtagttacatctactatccagacagtgtgaagggccgattcaccatctccagagacaatgccaggaacaccctgtacctgcaaatgagcagtctgaggtctgaggacacggccttgtattactgcgcaagactggattactacggtagtagatcctatactatggactactggggtcaaggaacctcagtcaccgtctcctcagagagtcagtccttcccaaatgtcttccccctcaacc
	F63gca1_MsVHE	Musmus IGHV1-12*01 F	M	0	0	0	3	1	2	2	0	2	6	3	3	11	Musmus IGHJ2*01 F			8.8.5	[13.17.38.11]	CARSDYW	in-frame	+	tgagcctggggcctcagtgaagatgtcctgcaaggcttctggctacacatttaccagttacaatatgcactgggtaaagcagacacctggacagggcctggaatggattgggactatgtatccaggaaatggtgaaacttcctacaatcagaagttcaaaggcaaggccacattgactgcagacaaatcctccagcacagcctacatgcagctcagcagcctgatatctgaggactctgcggtctattactgtgcaagatcggactactggggccaaggcaccactctcacagtctcctcagagagtcagtccttcccaaatgtcttccc
	F63gcf1_MsVHE	Musmus IGHV1-14*01 F	M	0	0	0	0	0	0	1	0	1	0	0	0	1	Musmus IGHJ2*01 F (see comment)	Musmus IGHD1-1*01 F	3	8.8.12	[14.17.38.11]	CARGDYYGSSYGYW	in-frame	+	ctggtagcctggggcttcagtgaagatgtcctgcaaggcttctggatacacattcactagctatgttatgcactgggtgaagcagaagcctgggcagggccttgagtggattggatatattaatccttacaatgatggtactaagtacaatgagaagttcaaaggcaaggccacactgacttcagacaaatcctccagcacagcctacatggagctcagcagcctgacctctgaggactctgcggtctattactgtgcaagaggggattactacggtagtagctacggctactggggccaaggcaccactctcacagtctcctcagagagtcagtccttcccaaatgtcttcccc
	F63gcc3_MsVHE	Musmus IGHV1-26*01 F	G1	4	1	3	4	1	3	1	0	1	6	3	3	15	Musmus IGHJ3*01 F	Musmus IGHD3-2*02 F	1	8.8.7	[14.17.38.11]	CAREPRAYW	in-frame	+	tggatgagcctggggcttcagtaaagatatcctgcaaggcttctggttactcattcactggctactacatgcactgggtgaaacagagccatggaaagagccttgagtggattggacgtgttaatcctaacaatggtggtactaactacaaccagaagttcaagggcaaggccatattaactgtagacaagtcatccagcacagccttcatggagctccgcagcctgacatctgaggactctgcggtctattactgtgcaagagagccaagggcttactggggccaagggactctggtcactgtctctgcagccaaaacgacacccccatctgtctatccactggcccctggatctgctgcccaaactaactccatggtgaccctgggatgcctggtca…
	F63gce2_MsVHE	Musmus IGHV1-26*01 F	G1	4	1	3	7	1	6	2	0	2	4	2	2	17	Musmus IGHJ2*01 F (see comment)	Musmus IGHD2-1*01 F	3	8.8.9	[14.17.38.11]	CTIYSGTEDYW	in-frame	+	gatgagcctggggcttcagtgaagatatcctgcaaggcttctggttactctttcactggctactacactcactgggtgaagcagagccatggacagagccttgagtggattgggcgtgttaatcctaacaatggtggttctaactacaaccagaagttcaagggcaaggccatattaactgtagacaagtcctccagcacagcctacatggagctccgcagcctgacatctgaggactctgcggtctattactgtacgatctactctggtactgaagactactggggccaaggcaccactctcacagtctcctcagccaaaacgacacccccatctgtctatccactggcccctggatctgctgcccaaactaactccatggtgaccctgggatgcctg…
	F63gce1_MsVHE	Musmus IGHV1-61*01 F, or Musmus IGHV1-74*01 F or Musmus IGHV1-74*04 F	M	1	0	1	6	1	5	3	1	2	9	2	7	19	Musmus IGHJ4*01 F	Musmus IGHD2-10*02 F	3	8.8.11	[14.17.38.11]	CARSYGFDAMDYW	in-frame	+	gtgaggcctggagcttcagtgaaactgtcctgcaaggcttctggctactccttcaccagctactggatgaactgggtgaagctgaggcctggacaaggccttgaatggattggcatgattcatccttccgatagtgaaactaggttaaatcagaagttcaaggacaaggccacattgactgtagacaaatcctccagcacagcctacatgcaactcagcagcccgacatctgatgactctgcggtctattactgtgcaagatcgtatggtttcgatgctatggactactggggtcaaggaacctcagtcaccgtctcctcagagagtcagtccttcccaaattccttccccctcatc
	F63gcb5_MsVHE	Musmus IGHV1-74*01 F, or Musmus IGHV1-74*04 F	M	1	0	1	4	2	2	2	1	1	8	2	6	15	Musmus IGHJ4*01 F	Musmus IGHD3-2*02 F	1	8.8.10	[12.17.38.11]	CARRYRDAMDYW	in-frame	+	ggatggaggttcagtgaagctgtcctgcaaggcttctggctactccttcaccagctactggatgaactgggtgaagcagaggcctggacaaggccttgagtggattggcatgattcatccttccgatagtgaaactaggttaaatcagaagttcaaggacaaggccacattgactgtagacaaatcctccagcacagcctacatgcaactcagcagcccgacatctgaggactctgcggtctattactgtgcaagacggtacagggatgctatggactactggggtcaaggaacctcagtcaccgtctcctcagagagtcagtccttcccaaattccttccccctcatag
	F63gcc5_MsVHE	Musmus IGHV1-74*01 F, or Musmus IGHV1-74*04 F	M	0	0	0	5	2	3	4	2	2	7	2	5	16	Musmus IGHJ4*01 F	Musmus IGHD2-4*01 F	2	8.8.13	[12.17.38.11]	CAREMGLRNYAMDYW	in-frame	+	agcatggggctccagtgaagctgtcctgcaaggcttctggctacaccttcaccagctactggatgaactggatgaagcagaggcctggacgaggcctcgagtggattggaaggattgatccatccgatagtgaaactcactacaatcaaaagttcaaggacatagccacactgactgtagacaaatcctccagcacagcctacatccaactcagcagcctgacatctgaggactctgcggtctattactgtgcaagagaaatgggattacggaactatgctatggactactggggtcaaggaacctcagtcaccgtctcctcagagagtcagtccttcccaaatgtccttcccccacagc
	F63gcd3_MsVHE	Musmus IGHV14-3*02 F	G2A	0	0	0	2	2	0	1	0	1	0	0	0	3	Musmus IGHJ2*01 F	Musmus IGHD1-1*01 F	3	8.8.12	[12.17.38.11]	CARDYGSSHPFDYW	in-frame	+	gagcaggggcctcagtcaagttgtcctacacagcttctggcttcaacattaaagacacctatatgcactgggtgaaacagaggcctgaacagggcctggaatggattggaaggattgatcctgcgaatggtgatactaaatatgacccgaagttccagggcaaggccactataacagcagacacatcctccaacacagcctacctgcagctcagcagcctgacatctgaggacactgccgtctattactgtgctagagactacggtagtagccacccctttgactactggggccaaggcaccactctcacagtctcctcagccaaaacaacagccccatcggtctatccactggcccctgtgtgtggagatacaactggctcctcggtgactctaggat…
	F63gca5_MsVHE	Musmus IGHV14-4*02 F	G1	0	0	0	2	0	2	0	0	0	0	0	0	2	Musmus IGHJ4*01 F	Musmus IGHD2-12*01 F	2	8.8.9	[12.17.38.11]	CNALLLPMDYW	in-frame	+	aggtaggggcctcagtcaagttgtcctgcacagcttctggcttcaacattaaagactactatatacagtgggtgaagcagaggcctgaacagggcctggagtggattggatggattgatcctgagaatggtgatactgaatatgccccgaagttccagggcaaggccactatgactgcagacacatcctccaacacagcctacctgcagctcagcagcctgacatctgaggacactgccgtctattactgtaatgcgttacttcttcctatggactactggggtcaaggaacctcagtcaccgtctcctcagccaaaacgacacccccatctgtctatccactggcccctggatctgctgcccaaactaactccatggtgaccctgggatgcctgggtc…
	F63gch2_MsVHE	Musmus IGHV14-4*02 F	G1	0	0	0	0	0	0	0	0	0	1	1	0	1	Musmus IGHJ4*01 F	Musmus IGHD2-14*01 F	3	8.8.14	[12.17.38.11]	CNERDYYRSYYDMDYW	in-frame	+	ggtaggggcctcagtcaagttgtcctgcacagcttctggcttcaacattaaagactactatatgcactgggtgaagcagaggcctgaacagggcctggagtggattggatggattgatcctgagaatggtgatactgaatatgccccgaagttccagggcaaggccactatgactgcagacacatcctccaacacagcctacctgcaactcagcagcctgacatctgaggacactgccgtctattactgtaatgagcgggactactataggtcttactatgatatggactactggggtcaaggaacctcagtcaccgtctcctcagccaaaacgacacccccatctgtctatccactggcccctggatctgctgcccaaactaactccatggtgaccct…
	F63gcb1_MsVHE	Musmus IGHV1S16*01 P	G1	2	0	2	4	0	4	0	0	0	6	1	5	12	Musmus IGHJ3*01 F	Musmus IGHD2-13*01 F	2	8.8.11	[13.17.38.11]	CSRWRLGVGFAYW	in-frame	+	tgagcatggggcttcagtgaagttgtcctgcaaggcttctggctacaccttcaccagctactatatatactgggtgaagcagaggcctggacaaggccttgagtggattggagagattaatcctagcaatggtggtactcacttcaatgagaagttcaagaccaaggccacactgactgtagacaaatcctccagcacagcgttcatgcaactcagcagcctgacatctgaggactctgcggtctattactgttcaagatggagactgggagtggggtttgcttactggggccaagggactctggtcactgtctctgcagccaaaacgacacccccatctgtctatccactggcccctggatctgctgcccaaactaactccatggtgaccctgggatg…
	F63gcg5_MsVHE	Musmus IGHV1S34*01 F	M	2	0	2	2	0	2	2	0	2	1	0	1	7	Musmus IGHJ3*01 F			8.8.9	[14.17.38.11]	CASHWEGFAYW (see Functionality comment)	in-frame	+	cagtgagactggggcttcagtgaagatatcctgcaaggcttctggttactcattcactgctgactacatacactgggtcaagcagagccatggaaagtgccttgagtggattggatatattacttgttacagtggtgctactagctacaaccagaagttcaagggcaaggccacattttctgtagacacatcctccagcacagcctacatgcagttcaacagcctgacatctgaagactctgcggtctattactgtgcaagccactgggaagggtttgcttattggggccaagggactctggtcactgtctctgcagagagtcagtccttcccaaatgtcttccccc
	F63gcc1_MsVHE	Musmus IGHV2-9*02 F	G1	0	0	0	2	2	0	0	0	0	0	0	0	2	Musmus IGHJ3*01 F	Musmus IGHD4-1*01 F	3	8.7.10	[15.17.38.11]	CARDDWAWFAYW	in-frame	+	actggtggcgcctcacagagcctgtccatcacttgcactgtctctgggttttcattaaccagctatggtgtgcactgggttcgccagcctccaggaaagggtttggagtggctgggagtaatatgggctggtggaagcacaaattataattcggctctcatgtccagactgagcatcagcaaagacaactccaagagccaagttttcttaaaaatgaacagtctgcaaactgatgacacagccatgtactactgtgccagagatgactgggcctggtttgcttactggggccaagggactctggtcactgtctctgcagccaaaacgacacccccatctgtctatccactggcccctggatctgctgcccaaactaactccatggtgaccctgggatgc…
	F63gcf2_MsVHE	Musmus IGHV3-1*02 F	M	0	0	0	1	1	0	2	0	2	0	0	0	3	Musmus IGHJ1*01 F	Musmus IGHD2-1*01 F	3	9.7.15	[13.17.38.11]	CARWMDGNYPYWYFDVW	in-frame	+	gatgaccttctcagtcactttcactcacctgcactgtcactggctactccatcaccagtggttatagctggcactggatccggcaatttccaggaaacaaactggaatggatgggctacatacactacagtggtgccactaactacaacccatctctcaaaagtcgaatctctatcactcgagacacatccaagaaccagttcttcctgcagttgaattctgtgactactgaggacacagccacatattactgtgcaagatggatggatggtaactacccctactggtacttcgatgtctggggcgcagggaccacggtcaccgtctcctcagagagtcagtccttcccaaatgtcttcc
	F63gcf5_MsVHE	Musmus IGHV5-6-3*01 F	G2B	1	0	1	0	0	0	0	0	0	0	0	0	1	Musmus IGHJ3*01 F	Musmus IGHD1-1*01 F	3	8.8.14	[13.17.38.11]	CARDPHYYGSRGFAYW	in-frame	+	agtgagcctggagggtccctgaactctcctgtgcagcctctggattcactttcagtagctatgacatgtcttgggttcgccagactccagacaagaggctggagttggtcgcaaccattaatagtaatggtggtagcacctattatccagacagtgtgaagggccgattcaccatctccagagacaatgccaagaacaccctgtacctgcaaatgagcagtctgaagtctgaggacacagccatgtattactgtgcaagagacccgcattactacggtagtaggggctttgcttactggggccaagggactctggtcactgtctctgcagccaaaacaacacccccatcagtctatccactggcccctgggtgtggagatacaactggttcctccgtga…
E3 boost day 17	Sequence ID	V-GENE and allele	Isotype	CDR1T	CDR1S	CDR1R	FR2T	FR2S	FR2R	CDR2T	CDR2S	CDR2R	FR3T	FR3S	FR3R	Tot Mut	J-GENE and allele	D-GENE and allele	D-REGION reading frame	CDR-IMGT lengths	FR-IMGT lengths	AA JUNCTION	JUNCTION frame	Orientation	Sequence
	F101gcc3_MsVHE	Musmus IGHV1-18*01 F, or Musmus IGHV1-26*01 F or Musmus IGHV1-34*01 F or Musmus IGHV1-37*01 F or Musmus IGHV1S30*02 F	G1	4	1	3	5	1	4	2	1	1	8	2	6	19	Musmus IGHJ3*01 F	Musmus IGHD6-3*01 F	2	8.8.10	[13.17.38.11]	CAREGQTGLAYW	in-frame	+	gtgagcctggggcttcagtgaagatatcctgcaaggcttctggttactcattcactggctactacatgcactgggtgaagcaaagccatgtaaagagccttgagtggattggacgtattaatccttacaatggtggtacgttctacaaccagaatttcaaggacaaggccaccttgactgtagataagtcctccagcacagcctacatggagctccacagcctgacatctgaggactctgcagtctatttctgtgcaagagagggccaaactgggcttgcttactggggccaagggactctggtcactgtctctgcagccaaaacgacacccccatctgtctatccactggcccctggatctgctgcccaaactaactccatggtgaccctgggatgcc…
	F101gce1_MsVHE	Musmus IGHV1-26*01 F	M	2	0	2	1	0	1	1	0	1	7	1	6	11	Musmus IGHJ2*01 F	Musmus IGHD2-14*01 F	3	8.8.13	[15.17.38.11]	CARSRYDVEYLFDYW	in-frame	+	agctggtgagcctggggcttcagtgaagatgtcctgcaaggcttctggatacatcttcactgactactacatgaagtgggtgaagcagagccatggaaagagccttgagtggattggagatattaatcctaacaatggtgatactttctacaaccagaagttcaagggcaaggccacattgactgtagacaaatcctccagcacagcctacatgcagctcaaaagcctgacatctgaggactctgcagtctattactgtgcaagaagcaggtacgacgtggagtacctctttgactactggggccaaggcaccactctcacagtctcctcagagagtcagtccttcccaaatgtcttc
	F101gcg1_MsVHE	Musmus IGHV1-26*01 F	G1	4	1	3	4	1	3	4	0	4	7	1	6	19	Musmus IGHJ2*01 F (see comment)	Musmus IGHD3-2*02 F	2	8.8.9	[8.17.38.11]	CVRNGPYFDYW	in-frame	+	agtgaagatatcctgcaaggcttctggttactcattcactggctactacatgaactgggtgaagcaaagccatgtaaagagccttgagtggattggacgtattaatccttacaattttgctactacctacaaccagaatttcaaggacaaggccagcttgactgtagataagtcctccagcacagcctacatggagctccacagcctgacatctgaggactctgcagtctattactgtgtacgaaacggcccatactttgactactggggccaaggcaccactctcacagtctcctcagccaaaacgacacccccatctgtctatccactggcccctggatctgctgcccaaactaactccatggtgaccctgggatgcctggtcaagggtt
	F101gcf2_MsVHE	Musmus IGHV1-34*01 F	G1	3	1	2	7	1	6	4	0	4	7	2	5	21	Musmus IGHJ3*01 F	Musmus IGHD1-1*01 F	1	8.8.12	[14.17.38.11]	CAYFTPVLATRACW	in-frame	+	tgatgagcctggggcttcagtgatgatatcctgcaaggcttctggttactcattcactgactgctacatacactgtgtgaagcaaagccatgtaaagcgccttgagtggattggacgtattaatccttacaatggtgctactgactacaaccagaatttcaaggacaaggccaccttgactgtagataagtcctccagcacagcctacatggagctccacagcctgacatctgaggactctgcagtcttttactgtgcatattttactccggtattagctacgagggcttgctggggccgagggactctggtcactgtctctgcagccaaaacgacacccccatctgtctatccactggcccctggatctgctgcccaaactaactccatggtgaccct…
	F101gce2_MsVHE	Musmus IGHV1-42*01 F, or Musmus IGHV1-43*01 F	G1	0	0	0	4	1	3	1	1	0	9	4	5	14	Musmus IGHJ3*01 F	Musmus IGHD2-1*01 F	3	8.8.13	[14.17.38.11]	CTRDYHGNYVGLAYW	in-frame	+	tggtgagcctggggcttcagtgaagatatcctgcaaggcttctggttactcattcactggctactacatgcaatgggtgaagcaaagtcctgaaaatagtcttgagtggattggagagattaatcctagcactgggggtactagctacaaccagaaattcaagggcaaggccacattaactgtagataaatcctccagcacagcctacttgcagctcaacagcctgacatctgaagagtctgcagtctattactgtacaagagactaccatggtaactacgtggggttggcttactggggccaagggactctggtcactgtctctgcagccaaaacgacacccccatctgtctatccactggcccctggatctgctgcccaaactaactccatggtgac…
	F101gcd1_MsVHE	Musmus IGHV1-69*02 F	M	0	0	0	0	0	0	1	0	1	2	0	2	3	Musmus IGHJ2*01 F	Musmus IGHD1-1*01 F	1	8.8.12	[14.17.38.11]	CARLRVVATPFDYW	in-frame	+	ttgtgagcctggggcttcagtgaagctgtcctgcaaggcttctggctacaccttcaccagctactggatgcactgggtgaagcagaggcctggacaaggccttgagtggatcggagagattgatccttctgataattatactaactacaatcaaaagttcaagggcaaggccacattgactgtagacaaatcctccagcacagcctacatacagttcagcagcctgacatctgaggactctgcggtctattactgtgcaagattgagggtagtagctaccccttttgactactggggccaaggcaccactctcaaagtctcctcagagagtcagtccttcccaaatgtcttc
	F101gcb2_MsVHE	Musmus IGHV1S135*01 [F]	G1	0	0	0	1	0	1	3	1	2	4	1	3	8	Musmus IGHJ4*01 F	Musmus IGHD2-14*01 F	3	8.8.13	[14.17.38.11]	CARAGRYDDYAMDYW	in-frame	+	tggtgagcctggggcttcagtgaaggtttcctgcaaggcttctggttactcattcactgactacaacatgtactgggtgaggcagagccatggaaagagccttgagtggattggatattttgatcctcacaatggtggaactagctttaaccagaaattcaagggcaaggccacattgactgttgacaagtcctccagcacagccttcatgcatctcaacagcctgacatctgaggactctgtagtctattactgtgcaagagcgggtaggtacgacgactatgctatggactactggggtcaaggaacctcagtcaccgtctcctcagccaaaacgacacccccatctgtctatccactggcccctggatctgctgcccaaactaactccatggtgac…
	F101gch2_MsVHE	Musmus IGHV1S34*01 F	G2A	1	0	1	2	0	2	2	0	2	3	2	1	8	Musmus IGHJ3*01 F			8.8.11	[14.17.38.11]	CAREGLSDGFAYW (see Functionality comment)	in-frame	+	cagtgagactggggcttcagtgaagatatcctgcaaggcttctggttactcattcactgcttactacatacaatgggtcaagcagagccatggaaagagccttgagtggattggatatattaattgttacaatggtggtactagctacaaccagaagttcaaagacaaggccacatttactgtagacacgtcctccagcacagcctacatgcagttcaacagcctgacatctgaagactctgcggtctattactgtgcaagagagggcctttccgacgggtttgcttactggggccaagggactctggtcactgtctctacagccaaaacaacagccccatcggtctatccactggcccctgtgtgtggagatacaactggctcctcggtgactctagg…
	F101gcd3_MsVHE	Musmus IGHV1S50*01 F, or Musmus IGHV1S56*01 F	G1	3	0	3	1	0	1	1	0	1	5	0	5	10	Musmus IGHJ4*01 F	Musmus IGHD4-1*01 F	1	8.8.12	[15.17.38.11]	CARAGTSGYAMDYW	in-frame	+	gctggtgagcctggggcttcagtgaagatgtcctgcaaggcttctggctacaccttcacaacatactatatacactgggtgaaacagaggcctggacagggacttgagtggattggatggatttatcctggagatggttatactaagtacaatgagaacttcaagggcaagaccacactgactgcagacaaatcctccagaacagcctacatgttgctcagcagcctgacctctgaggactctgcgatctatttctgtgcaagggctgggacgtcaggatatgctatggactactggggtcaaggaacctcagtcaccgtctcctcagccaaaacgacacccccatctgtctatccactggcccctggatctgctgcccaaactaactccatggtgacc…
	F101gcd2_MsVHE	Musmus IGHV1S56*01 F	G1	2	0	2	2	1	1	2	1	1	6	1	5	12	Musmus IGHJ2*01 F			8.8.11	[8.17.38.11]	CARGPRPHYFDYW (see Functionality comment)	in-frame	+	gtgaagatttcctgcaaggcttctggctacaccttcacaacctactatatatactgggtgaagcaaaggcctggacagggacttgagtggattggatggatttatcctggagatggaactactaagtacaatgagaagttcaagggcaagaccacactgactgcaaacaaatcctccagcacagcctacatgttgctcagcagcctgacctctgaggactctgcgatctatctctgtgcaagggggccacggccccactactttgactactggggccaaggcaccactctcacagtctcctcagccaaaacgacacccccatctgtctatccactggcccctggatctgctgcccaaactaactccatggtgaccctgggatgcctggtcaagggc
	F101gch1_MsVHE	Musmus IGHV1S56*01 F	M	4	1	3	1	1	0	2	0	2	5	1	4	12	Musmus IGHJ4*01 F			8.8.13	[15.17.38.11]	CSREGKYDDYFMDYW (see Functionality comment)	in-frame	+	gctggtgagcctggggcttcagtgaagatgtcctgcaaggcttctggcaacaccttcacaaactattatatacattgggtgaagcagaggcctggacagggacttgagtggattggatggatttatcctggaaatggtagtactaagtacaatgagaagttcaagggcaagaccacactgactgcagacaaatcctccagcacagcctacatgttggtcagcagcctgacctctgaggactctgcgatctatttctgttcaagggaggggaaatacgacgactattttatggactactggggtcaaggaacctcagtcaccgtctcctcagagagtcagtccttcccaaattccttc
	F101gca2_MsVHE	Musmus IGHV2-9*02 F	M	1	0	1	2	1	1	2	0	2	3	0	3	8	Musmus IGHJ4*01 F	Musmus IGHD1-1*01 F	3	8.7.15	[15.17.38.11]	CARGHGSSSFYYALDYW	in-frame	+	gctggtggcgccctcacagagcctgtccatcacttgcactgtctctgggttttcattaaccagctatagtgtacactgggttcgccagcctccaggagagggtcttgagtggctgggagtaatgtgggctggtggaggcacaaattataattcggctctcatgtccagactgaccatcagcaaagacatcgccaagagccaagttttcttaaaaatgaacagtctgcaaactgatgacacagccatgtactactgtgccagaggacacggtagtagctccttttactatgctctggactactggggtcaaggaacctcggtcaccgtctcctcagagagtcagtccttcccaaatgtcttccccctgg
	F101gcg3_MsVHE	Musmus IGHV5-6-2*02 F	M	0	0	0	0	0	0	0	0	0	0	0	0	0	Musmus IGHJ1*01 F	Musmus IGHD1-2*01 F	3	8.8.16	[14.17.38.11]	CARRSHYFGYEDWYFDVW	in-frame	+	tagtgagcttggagggtccctgaactctcctgtgcagcctctggattcactttcagtagctattacatgtcttgggttcgccagactccagagaagaggctggagttggtcgcagccattaatagtaatggtggtagcacctactatccagacactgtgaagggccgattcaccatctccagagacaatgccaagaacaccctgtacctgcaaatgagcagtctgaagtctgaggacacagccttgtattactgtgcaagacggagtcattacttcggctacgaggactggtacttcgatgtctggggcgcagggaccacggtcaccgtctcctcagagagtcagtccttcccaaatgtcttcaccct
	F101gcf1_MsVHE	Musmus IGHV5-6*01 F, or Musmus IGHV5-6*02 [F] or Musmus IGHV5-6*03 [F] or Musmus IGHV5-6-1*01 F	G1	1	0	1	1	0	1	1	0	1	0	0	0	3	Musmus IGHJ2*01 F	Musmus IGHD1-1*01 F	3	8.8.16	[14.17.38.11]	CARPCYYGSRKDYYFDYW	in-frame	+	agtgaagcctggagggtccctgaactcctcctgtgtagcctctggattcactttcagtaggtatggcatgtcttgggttcgccagacttcagacaagaggctggagtgggtcgcaaccattagtagtggtggtggttacacctactatccagacagtgtgaaggggcgattcaccatctccagagacaatgccaagaacaccctgtacctgcaaatgagcagtctgaagtctgaggacacagccatgtattactgtgcaagaccgtgttactacggtagtaggaaggattactactttgactactggggccaaggcaccactctcacagtctcctcagccaaaacgacacccccatctgtctatccactggcccctggatctgctgcccaaactaactc…
	F102gcc2_MsVHE	Musmus IGHV1-14*01 F	M	0	0	0	0	0	0	1	0	1	0	0	0	1	Musmus IGHJ3*01 F	Musmus IGHD2-2*01 F	3	8.8.13	[14.17.38.11]	CARLDYGYDVRFAYW	in-frame	+	ctggtagcctggggcttcagtgaagatgtcctgcaaggcttctggatacacattcactagctatgttatgcactgggtgaagcagaagcctgggcagggccttgagtggattggatatattaatccttacaatgatggtactaagtacaatgagaagttcaaaggcaaggccacactgacttcagacaaatcctccagcacagcctacatggagctcagcagcctgacctctgaggactctgcggtctattactgtgcaagattagactatggttacgacgtccggtttgcttactggggccaagggactctggtcactgtctctgcagagagtcagtccttcccaaattcct
	F102gcb1_MsVHE	Musmus IGHV1-15*01 F	G1	3	0	3	2	2	0	2	0	2	3	0	3	10	Musmus IGHJ4*01 F	Musmus IGHD1-3*01 F	3	8.8.8	[16.17.38.11]	CTRSGGMDYW	in-frame	+	tgagctggtgaggcctggggcttcagtgacgctgtcctgcaaggcttcgggctacatagttagtgactatgaaatgcactgggtgaaacagacacctgtccatggcctggaatggattggagctattgatcctgaaactggtactactgcctacaatcagaagttcaagggcaaggccacactgactgcagacaaatcctccagcacagcctacatggcgctccgcagcctgacatctgaggactctgccgtctatttctgtacaagaagcggtggtatggactactggggtcaaggaacctcagtcaccgtctcctcagccaaaacgacacccccatctgtctatccactggcccctggatctgctgcccaaactaactccatggtgaccctgggatg…
	F102gcb4_MsVHE	Musmus IGHV1-15*01 F	G1	0	0	0	1	0	1	2	0	2	4	1	3	7	Musmus IGHJ2*03 F	Musmus IGHD2-3*01 F	3	8.8.8	[15.17.38.11]	CTTDGFPDYW	in-frame	+	gctggtgaggcctggggcttcagtgacgctgtcctgcaaggcttcgggctacacatttactgactatgaaatgcactgggtgaagcagacacctgtgcgtggcctggaatggattggagctattgatcctgaaactggtaatactgcctacaatcagaagttcaaggacaaggccacactgactgcagacaaatcctccagcacagcctacatggaactccgcagcctgacatctgaggactctgacgtctattactgtacaacggatggtttccctgactactggggccaaggcaccagtctcacagtctcctcagccaaaacgacacccccatctgtctatccactggcccctggatctgctgcccaaactaactccatggtgaccctgggatgcct…
	F102gcd1_MsVHE	Musmus IGHV1-15*01 F	G1	0	0	0	0	0	0	3	0	3	6	1	5	9	Musmus IGHJ2*01 F (see comment)	Musmus IGHD2-3*01 F	3	8.8.8	[14.17.38.11]	CSTDGFPDYW	in-frame	+	gtgaggcctggggcttcagtgacgctgtcctgcaaggcttcgggctacacatttactgactatgaaatgcactgggtgaagcagacacctgtgcatggcctggaatggattggagctattgatcctgaaactgctaatactgcctacaatctgaagttcaaggacaaggccacactgactgcacacaaatcctccagcacagcctacatggagctccgcagcctgacatttgaggactctgccgtctattactgctcaacggatggtttccctgactactggggccaaggcaccactctcacagtctcctcagccaaaacgacacccccatctgtctatccactggcccctggatctgctgcccaaactaactccatggtgaccctgggatgcctggtc…
	F102gce3_MsVHE	Musmus IGHV1-15*01 F	G1	0	0	0	0	0	0	2	0	2	3	0	3	5	Musmus IGHJ2*01 F (see comment)	Musmus IGHD3-1*01 F	3	8.8.8	[14.17.38.11]	CTRSGSLDYW	in-frame	+	ggtgaggcctggggcttcagtgacgctgtcctgcaaggcttcgggctacacatttactgactatgaaatgcactgggtgaagcagacacctgtgcatggcctggaatggattggagctattgatcctgaaactggtattactgcctacaatcagaagttcaagggcaaggccacactgactgaagacaaatcctccagcacagcctacatggagctccgcagactgacatctgaggactctgccgtctattactgtacaagatcggggagccttgactactggggccaaggcaccactctcacagtctcctcagccaaaacgacacccccatctgtctatccactggcccctggatctgctgcccaaactaactccatggtgaccctgggatgcctggt…
	F102gcf3_MsVHE	Musmus IGHV1-15*01 F	G1	1	0	1	0	0	0	1	0	1	2	0	2	4	Musmus IGHJ2*01 F (see comment)	Musmus IGHD3-1*01 F	3	8.8.8	[15.17.38.11]	CTRSGSLDYW	in-frame	+	gctggtgaggcctggggcttcagtgacgctgtcctgcaaggcttcgggctacacatttcctgactatgaaatgcactgggtgaagcagacacctgtgcatggcctggaatggattggagctattgatcctgaaactggtgctactgcctacaatcagaagttcaagggcaaggccacactgactgcagacaaatcctccagcacagcctacatggagctccgcagcctgacatctgaggactctgtcgtctattactgtacaagatcggggagccttgactactggggccaaggcaccactctcacagtctcctcagccaaaacgacacccccatctgtctatccactggcccctggatctgctgcccaaactaactccatggtgaccctgggatgcct…
	F102gcg2_MsVHE	Musmus IGHV1-15*01 F	G1	0	0	0	2	0	2	3	1	2	4	0	4	9	Musmus IGHJ2*01 F, or Musmus IGHJ2*02 F (see comment)	Musmus IGHD2-3*01 F	3	8.8.8	[14.17.38.11]	CSTDGFPDYW	in-frame	+	ggtgaggcctggggcttcagtgacgctgtcctgcaaggcttcgggctacacatttactgactatgaaatgcactgggtgagacagacacctgtgcatggcctggaatggattggagctattgatcctgaaaccggtaatactgcctacaatcagaggttcaagggcaaggccacactgactgcagacaaatcctccatcacagcctacatggatctccgcagcctgacatctgaggactctgccgtctattactgttcaacggatggtttccctgactactggggccaaggcaccgctctcacagtctcctcagccaaaacgacacccccatctgtctatccactggcccctggatctgctgcccaaactaactccatggtgaccctgggatgcctggt…
	F102gcb3_MsVHE	Musmus IGHV1-26*01 F	G1	3	1	2	5	1	4	3	0	3	8	1	7	19	Musmus IGHJ2*01 F	Musmus IGHD1-1*02 F	2	8.8.9	[15.17.38.11]	CAKLSYDFDYW	in-frame	+	agctggtgagcctggggcttcagtgaagatatcctgcaaggcttctggttactcattcactgactactacatgcactgggtgaagcaaagccatgtaaagagccttgagtggattggacgtattaatccttacgatggtgctactaactacaaccagaatttcaaggacaaggccagcttgactgtagataagtcctccagcacagcctacatggacctccacagcctgacatctgaggactctgcagtctattactgtgcaaaattgtcctacgactttgactactggggccaaggcaccactctcacagtctcctcagccaaaacgacacccccatctgtctatccactggcccctggatctgctgcccaaactaactccatggtgaccctgggatg…
	F102gce1_MsVHE	Musmus IGHV1-37*01 F	G2B	0	0	0	1	1	0	0	0	0	1	0	1	2	Musmus IGHJ4*01 F			8.8.6	[14.17.38.11]	CARGMDYW	in-frame	+	tggtgagcctggggcttcagtgaagatatcctgcaaggcttctggttactcatttactggctactttatgaactgggtgaagcagagccatggaaagagccttgagtggattggacggattaatccttacaatggtgatactttctacaaccagaagttcaagggcaaggccacattgactgtagacaaatcctctagcacagcccacatggagctcctgagcctgacatctgaggactctgcagtctattattgtgcaaggggtatggactactggggtcaaggaacctcagtcaccgtctcctcagccaaaacaacacccccatcagtctatccactggcccctgggtgtggagatacaactggttcctccgtgactctgggatgcctggtcaaggg…
	F102gcg3_MsVHE	Musmus IGHV1-7*01 F	G1	0	0	0	1	0	1	2	1	1	8	3	5	11	Musmus IGHJ2*01 F	Musmus IGHD2-14*01 F	3	8.8.12	[12.17.38.11]	CARNYRNDEGFDYW	in-frame	+	ccaggggcctcagtgaaggtgtcctgcaaggcttctggctacacctttactagctactggatgcactgggtaaaacagaggcctggacaggatctggaatggattggatacattaatcctagtaatggttatactgagtaccatcagaagttcaaggacaaggccagattgactgcagacaaatcctccagcacagcctacatgcaactgagcagcctgacatctgacgactctgcagtgtattattgtgcaagaaactataggaacgacgaaggctttgactactggggccaaggcaccactctcacagtctcctcagccaaaacgacacccccatctgtctatccactggcccctggatctgctgcccaaactaactccatggtgaccctgggatgc…
	F102gcd2_MsVHE	Musmus IGHV14-3*02 F	G2A	1	0	1	2	1	1	2	0	2	3	1	2	8	Musmus IGHJ3*01 F	Musmus IGHD3-1*01 F	1	8.8.7	[11.17.38.11]	CSGTAGDYW	in-frame	+	ggggcctcagtcaagttgtcctgcacagcttctggcttcaacattaaagacatctatattcactgggtgaaacagaggcctgaacagggcctggagtggattggaaggattgatcctgcgaatcttaatactaaatatgactcgaagttccagggcaaggccactataacagcagacacaccctccaacacagcctacctgcagctcagcagcctgacatctgaggacactgccgtctattattgttctggtactgcgggggactactggggccaagggactctggtcactgtctctgcagccaaaacaacagccccatcggtctatccactggcccctgtgtgtggagatacaactggctcctcggtgactctaggatgcctggtcagggttatt
	F102gcc1_MsVHE	Musmus IGHV14-4*02 F	G1	0	0	0	3	1	2	0	0	0	0	0	0	3	Musmus IGHJ2*01 F	Musmus IGHD2-3*01 F	2	8.8.9	[14.17.38.11]	CNWLLNLFDYW	in-frame	+	gtgaggtcaggggcctcagtcaagttgtcctgcacagcttctggcttcaacattaaagactactatctgcactgggtgaagcagaggcctgaacagggcctggaatgcattggatggattgatcctgagaatggtgatactgaatatgccccgaagttccagggcaaggccactatgactgcagacacatcctccaacacagcctacctgcagctcagcagcctgacatctgaggacactgccgtctattactgtaattggttactaaacctctttgactactggggccaaggcaccactctcacagtctcctcagccaaaacgacacccccatctgtctatccactggcccctggatctgctgcccaaactaactccatggtgaccctgggatgcctg…
	F102gca3_MsVHE	Musmus IGHV2-9*02 F	M	0	0	0	0	0	0	0	0	0	0	0	0	0	Musmus IGHJ3*01 F	Musmus IGHD4-1*01 F	2	8.7.10	[15.17.38.11]	CALELGRGFAYW	in-frame	+	aggatggcgtcctcacagagcctgtccatcacttgcactgtctctgggttttcattaaccagctatggtgtacactgggttcgccagcctccaggaaagggtctggagtggctgggagtaatatgggctggtggaagcacaaattataattcggctctcatgtccagactgagcatcagcaaagacaactccaagagccaagttttcttaaaaatgaacagtctgcaaactgatgacacagccatgtactactgtgccctcgaactgggacgagggtttgcttactggggccaagggactctggtcactgtctctgcagagagtcagtccttcccaaatgtcttcccccttg
	F102gcb2_MsVHE	Musmus IGHV5-6*01 F, or Musmus IGHV5-6*02 [F] or Musmus IGHV5-6*03 [F] or Musmus IGHV5-6-1*01 F (see comment)	G1	17	0	17	1	0	1	0	0	0	1	0	1	19	Musmus IGHJ2*01 F (see comment)	Musmus IGHD3-2*01 F	2	8.8.10	[14.17.38.11]	CVRDSPRGFDYW	in-frame	+	tagtgagcctggagggtccctgaactctcctgtgcagcctctggattcactttcagtaggtctagacatgtcttgggttcgccagactccagacaagaggctggagtgggccgcaaccattagtagtggtggtagttacacctactatccagacagtgtgaaggggcgattcaccatctccagagacaatgtcaagaacaccctgtacctgcaaatgagcagtctgaagtctgaggacacagccatgtattactgtgtaagggacagcccgagggggtttgactactggggccaaggcaccactctcacagtctcctcaaccaaaacgacacccccatctgtctatccactggcccctggatctgctgcccaaactaactccatggtgaccctgggatg…
	F103gca1_MsVHE	Musmus IGHV1-15*01 F	M	1	0	1	1	0	1	0	0	0	3	0	3	5	Musmus IGHJ2*01 F (see comment)	Musmus IGHD4-1*01 F	1	8.8.8	[2.17.38.11]	CARAGTFDYW	in-frame	+	aggcttcgggctacacattgactgactatgaaatgcactgggtgaagcatacacctgtgcatggcctggaatggattggagctattgatcctgaaactggtggtactgcctacaatcataagttcaagggcaaggccacactgactgcagacgaatcctccagcacagcctacatggagctccgcagcctgacatctgaggactctgccgtctattactgtgcaagagctgggacctttgactactggggccaaggcaccactctcacagtctcctcagagagtcagtccttcccaaatgtcttccccctca
	F103gcc3_MsVHE	Musmus IGHV1-18*01 F, or Musmus IGHV1-25*01 P or Musmus IGHV1-26*01 F or Musmus IGHV1S29*02 F	M	4	1	3	5	0	5	1	0	1	7	3	4	17	Musmus IGHJ2*01 F, or Musmus IGHJ2*02 F (see comment)	Musmus IGHD1-1*02 F	3	8.8.13	[14.17.38.11]	CTGCNFGGTRYFDYW	in-frame	+	tgatgagcctggagcttcatgaagatatcctgcaaggcttctggttactcattcactggctacaccatgaactgggtgaagcagaaccatggaaagaaccttgagtggattggacttattaatccttacaatggtggtactaactacaaccagaagttcaagggcaaggccacattaactgtagacaagtcatccaacacagcctacatggagctcctcagtctgacatctgaggactctgcagtctattactgtacaggatgtaactttggtgggacgagatactttgactactggggccaaggcaccgctctcacagtctcctcagagagtcagtccttcccaaatgtcttcacct
	F103gcd4_MsVHE	Musmus IGHV1-26*01 F, or Musmus IGHV1-31*01 F or Musmus IGHV1-37*01 F or Musmus IGHV1S30*02 F	G1	4	1	3	6	2	4	2	0	2	9	2	7	21	Musmus IGHJ4*01 F	Musmus IGHD2-1*01 F	3	8.8.14	[14.17.38.11]	CAVYYGNYDYYAMDCW	in-frame	+	ctggtgagcctggggcttcagtgaagatatcctgcaaggcttctggttactcattcactggctactacatgcactgggtgaaacaaagccatgtaaagagccttgagtggattggacgtattaatccttacaatggtgctactacctacaaccagaatttcaaggacaaggccagcttgactgtagataagtcctccagcacagcctacatggagctccacagcctgacatctgaggactctgcagtcttttattgtgcagtctactatggtaactacgattactatgctatggactgctggggtcaaggaacctcagtcaccgtctcctcagccaaaacgacacccccatctgtctatccactggcccctggatctgctgcccaaactaactccatgg…
	F103gcb2_MsVHE	Musmus IGHV1-82*01 F	M	2	1	1	1	0	1	1	0	1	6	3	3	10	Musmus IGHJ1*01 F	Musmus IGHD2-3*01 F	3	8.8.13	[14.17.38.11]	CAREGDGYYRYFDVW	in-frame	+	tggtgagcctggggcctcagtgaggatttcctgcaaagcttctggctacgcattcagtatctcttggatgaactgggtgaagcagaggcctggacagggtcttgagtggattggacggatttatcctggagatggagaaactaactacaatgggaagttcaagggcaaggccacaatgactgcagacaaatcctccagcacagtctacatgcagctcagcagcctgacctctgtggactctgcggtctatttctgtgcaagagagggggatggttactacaggtacttcgatgtctggggcgcagggaccacggtcaccgtctcctcagagagtcagtccttcccaaatgtcttccccctaat
	F103gce2_MsVHE	Musmus IGHV14-3*02 F	M	0	0	0	2	0	2	0	0	0	3	1	2	5	Musmus IGHJ1*01 F	Musmus IGHD4-1*01 F	1	8.8.10	[13.17.38.11]	CASTGDWYFDVW	in-frame	+	tgagcaggggcctcagtcaaggtgtcctgcacagcttctggcttcaacattaaagacacctatatacactgggtgcagcagaggcctgaacagggcctggagtggattggaaggattgatcctgcgaatggtaatactaaatatgacccggagttccagggcaaggccactctaacagcagacacatcctccaacacagcctacctgcagctcagcagcctgacatctgaagacactgccgtctattactgtgcttccactggggactggtacttcgatgtctggggcgcagggaccacggtcaccgtctcctcagagagtcagtccttcccaaatgtcttccccc
	F103gce1_MsVHE	Musmus IGHV14-4*02 F	M	0	0	0	2	0	2	1	0	1	2	1	1	5	Musmus IGHJ4*01 F	Musmus IGHD2-10*01 F	2	8.8.9	[14.17.38.11]	CNALLGAMDYW	in-frame	+	gtgaggtcaggggcctcagtcaagttgtcctgcacagcttctggcttcaacattaaagactactatatacactgggtgaagcagaggcctgaacagggcctggagtgtattggatggattgatcctgagaatggtgattctgaatatgccccgaagttccagggcaaggccactttgactgcagacacatcctccaacactgcctacctgcagctcagcagcctgacatctgaggacactgccgtctattactgtaatgccctactgggggctatggactactggggtcaaggaacctcagtcaccgtctcctcagagagtcagtccttcccaaatgccctt
	F103gce4_MsVHE	Musmus IGHV2-6-7*01 F, or Musmus IGHV2-6-7*02 F	G2B	0	0	0	0	0	0	0	0	0	0	0	0	0	Musmus IGHJ4*01 F	Musmus IGHD6-3*01 F	2	8.7.14	[9.17.38.11]	CARAPRYPYYYAMDYW	in-frame	+	tcagcctgtccatcacatgcaccgtctcagggttctcattaaccggctatggtgtaaactgggttcgccagcctccaggaaagggtctggagtggctgggaatgatatggggtgatggaagcacagactataattcagctctcaaatccagactgagcatcagcaaggacaactccaagagccaagttttcttaaaaatgaacagtctgcaaactgatgacacagccaggtactactgtgccagagcccctcgctacccttattactatgctatggactactggggtcaaggaacctcagtcaccgtctcctcagccaaaacaacacccccatcagtctatccactggcccctgggtgtggagatacaactggttcctccgtgactctgggatgcctgg…
	F103gca4_MsVHE	Musmus IGHV3-1*02 F	G2B	1	0	1	0	0	0	3	0	3	0	0	0	4	Musmus IGHJ3*01 F	Musmus IGHD1-1*01 F	1	9.7.12	[12.17.38.11]	CARQTTVVATKAYW	in-frame	+	accttctcagtcactttcactcacctgcactgtcactggctactccatcaccagtggttataactggcactggatccggcagtttccaggaaacaaactggaatggatgggctacatgcactacagtggtgtcactaactacaacccatctctcaaaagtcgaatctctatcactcgagacacatccaagaaccagttcttcctgcagttgaattctgtgactactgaggacacagccacatattactgtgcaagacagactacggtagtagctacgaaagcttactggggccaagggactctggtcactgtctctgcagccaaaacaacacccccatcagtctatccactggcccctgggtgtggagatacaactggttcctccgtgactctgggatg…
	F103gca3_MsVHE	Musmus IGHV3-2*02 F	G1	0	0	0	0	0	0	1	0	1	2	0	2	3	Musmus IGHJ3*01 F	Musmus IGHD4-1*01 F	2	9.7.9	[12.17.38.11]	CGRGLGPFAYW	in-frame	+	gaccttctcagtctctgtccctcacctgcactgtcactggctactcaatcaccagtgattatgcctggaactggatccggcagtttccaggaaacaaactggagtggatgggctacataagctacagtggtaccactaactacaacccatctctcaaaagtcgaatctctatcactcgagacacatccaagaaccagttcttcctgcagttgaattctgtgactactgaggacacaggcacatattactgtggaagaggtctgggaccgtttgcttactggggccaagggacgctggtcactgtctctgcagccaaaacgacacccccatctgtctatccactggcccctggatctgctgcccaaactaactccatggtgaccctgggatgcctggtca…
	F103gcd3_MsVHE	Musmus IGHV5-12*02 F	M	0	0	0	1	1	0	2	1	1	3	1	2	6	Musmus IGHJ4*01 F	Musmus IGHD2-1*01 F	3	8.8.11	[13.17.38.11]	CARPGNYSAMDYW	in-frame	+	tgagcctggagggtccctgaaactctcctgtgcaacctctggattcactttcagtgactattacatgtattgggttcgccagactccagagaagaggctggagtgggtcgcatatatcagtagtggtggtggtagcacctctaatccagacactgtaaagggccgattcaccatctccagagacaatgccaagaacaccctgtacttgcaaatgagccgtctgaagtctgaggacacagccatgtattactgtgcaagacccggtaactactctgctatggactactggggtcaaggaacctcagtcaccgtctcctcagagagtcagtccttcccaaatgtcttccccca
	F103gcf3_MsVHE	Musmus IGHV5-12*02 F	M	0	0	0	0	0	0	0	0	0	5	1	4	5	Musmus IGHJ3*01 F, or Musmus IGHJ3*02 P (see comment)	Musmus IGHD1-2*01 F	1	8.8.6	[13.17.38.11]	CTSHTTMW	in-frame	+	gtgagcctggagggtccctgaactctcctgtgcaacctctggattcactttcagtgactattacatgtattgggttcgccagactccagagaagaggctggagtgggtcgcatacattagtaatggtggtggtagcaccaattatccagacactctaaagggccgattcaccatctccagagacaatgccaagaacaccctgtacctgcaaatgagccgtctgaagtctgaggacacaggcatttactactgtacaagtcatactactatgtggggccaagggactctggtcactgtctctgcagagagtcagtccttcccaaatgtcttccccc
	F103gcg2_MsVHE	Musmus IGHV5-12*02 F	M	0	0	0	0	0	0	2	0	2	3	1	2	5	Musmus IGHJ3*01 F			8.8.5	[14.17.38.11]	CASLYGL (see Functionality comment)	in-frame	+	tagtgagcctggagggtccctgaactctcctgtgaaacctctggattcactttcagtgactattacatgtattgggttcgccagactccagagaagaggctggagtgggtcgcatacattagtaatggtggtggtagcatttattatgcagacactgtaaagggccgattcaccatctccagagacaatgccaagaacaccctgtacctacaaatgagccgtctgaagtctgaggacacagccatgtatttctgtgcaagcctctacggcttaggcctagggactctggtcactgtctctgcagagagtcagtccttcccaaattcttt
	F103gcb4_MsVHE	Musmus IGHV5-17*02 F	G1	0	0	0	0	0	0	1	0	1	2	0	2	3	Musmus IGHJ3*02 P	Musmus IGHD4-1*01 F	3	8.8.6	[13.17.38.11]	CARSYWGW	in-frame	+	tgagcctggagggtcccggaactctcctgtgcagcctctggattcactttcagtagctttggaatgcactgggttcgtcaggctccagagaaggggctggagtgggtcgcatacattagtagtggcagtagaaccatctactatacagacacagtgaagggccgattcaccatctccagagacaatctcaagaacaccctgttcctgcaaatgaccagtctaaggtctgaggacacggccatgtattactgtgcaagatcttattgggggtggggccaagggactctggtcactgtctctgcagccaaaacgacacccccatctgtctatccactggcccctggatctgctgcccaaactaactccatggtgaccctgggatgcctggtcaagggctat…
E4 boost day 7	Sequence ID	V-GENE and allele	Isotype	CDR1T	CDR1S	CDR1R	FR2T	FR2S	FR2R	CDR2T	CDR2S	CDR2R	FR3T	FR3S	FR3R	Tot Mut	J-GENE and allele	D-GENE and allele	D-REGION reading frame	CDR-IMGT lengths	FR-IMGT lengths	AA JUNCTION	JUNCTION frame	Orientation	Sequence
	F81gca1_MsVHE	Musmus IGHV5-17*02 F	M	0	0	0	0	0	0	0	0	0	0	0	0	0	Musmus IGHJ4*01 F	Musmus IGHD2-14*01 F	2	8.8.12	[13.17.38.11]	CARRPVRHYAMDYW	in-frame	+	agtgagcctggagggtcccggaactctcctgtgcagcctctggattcactttcagtagctttggaatgcactgggttcgtcaggctccagagaaggggctggagtgggtcgcatacattagtagtggcagtagtaccatctactatgcagacacagtgaagggccgattcaccatctccagagacaatcccaagaacaccctgttcctgcaaatgaccagtctaaggtctgaggacacggccatgtattactgtgcaagaaggccggtacgacactatgctatggactactggggtcaaggaacctcagtcaccgtctcctcagagagtcagtccttcccaaatgtccttccc
	F81gca2_MsVHE	Musmus IGHV5-12-1*01 F	M	1	0	1	1	1	0	1	0	1	1	1	0	4	Musmus IGHJ3*01 F			8.8.6	[15.17.38.11]	CARHIAYW	in-frame	+	agcttggtgagcctggagggtccctgaaactctcctgtgcagcctctggattcgctttcagtaactatgacatgtcttgggttcgccagactccggagaagaggctggagtgggtcgcatatattagtagtggtggtggtaacacctactatccagacactgtgaagggccgattcaccatctccagagacaatgccaagaacaccctgtacctgcaaatgagcagtctgaagtctgaggacacagccatgtattattgtgcaagacatattgcttactggggccaagggactctggtcactgtctctgcagagagtcagtccttcccaaatgtcttccccc
	F81gca4_MsVHE	Musmus IGHV2-3*01 F	G1	0	0	0	0	0	0	0	0	0	3	1	2	3	Musmus IGHJ1*01 F	Musmus IGHD6-3*01 F	2	8.7.11	[15.17.38.11]	CAKPNPYWYFDVW	in-frame	+	gactgatggcgctcacagagcctgtccatcacatgcactgtctcagggttctcattaaccagctatggtgtaagctgggttcgccagcctccaggaaagggtctggagtggctgggagtaatatggggtgacgggagcacaaattatcattcagctctcatatccagactgagcatcagcaaggataactccgagagccaagttttcttaaaacttaacagtctgcaaactgctgacacagccacgtactactgtgccaaaccgaacccttactggtacttcgatgtctggggcgcagggaccacggtcaccgtctcctcagccaaaacgacacccccatctgtctatccactggcccctggatctgctgcccaaactaactccatggtgaccctggga…
	F81gcc1_MsVHE	Musmus IGHV10-1*02 F	M	0	0	0	0	0	0	0	0	0	0	0	0	0	Musmus IGHJ4*01 F	Musmus IGHD2-14*01 F	3	8.10.14	[10.17.38.11]	CVRHQAYYRYDAMDYW	in-frame	+	aagggtcattgaaactctcatgtgcagcctctggattcaccttcaatacctacgccatgaactgggtccgccaggctccaggaaagggtttggaatgggttgctcgcataagaagtaaaagtaataattatgcaacatattatgccgattcagtgaaagacaggttcaccatctccagagatgattcacaaagcatgctctatctgcaaatgaacaacttgaaaactgaggacacagccatgtattactgtgtgagacatcaggcctactataggtacgatgctatggactactggggtcaaggaacctcagtcaccgtctcctcagagagtcag
	F81gcc4_MsVHE	Musmus IGHV1S56*01 F	M	1	0	1	0	0	0	2	0	2	2	1	1	5	Musmus IGHJ2*01 F			8.8.12	[14.17.38.11]	CARDYDGYYYFDYW (see Functionality comment)	in-frame	+	tggtgagcctggggcttcagtgagaatatcctgcaaggcttctggctacaccttcacaagctactatatacactgggtgaagcagaggcctggacagggacttgagtggattggatggatttatcctggaaatgttaatactaagtacaatgagaagttcaagggcaaggccacactgactgcagacaaatcctccagcacagcctacatgcagctcagcagcctgacctctgaggactctgcggtctatttctgtgcaagggactatgatggttactactactttgactactggggccaaggcaccactctcacagtctcctcagagagtcagtccttcccaaattcttcc
	F81gcd1_MsVHE	Musmus IGHV5-6*01 F, or Musmus IGHV5-6*02 [F] or Musmus IGHV5-6*03 [F] or Musmus IGHV5-6-1*01 F	M	0	0	0	0	0	0	0	0	0	0	0	0	0	Musmus IGHJ4*01 F	Musmus IGHD2-5*01 F	3	8.8.11	[14.17.38.11]	CARHGSNRLMDYW	in-frame	+	tagtgagcctggagggtccctgaactctcctgtgcagcctctggattcactttcagtagctatggcatgtcttgggttcgccagactccagacaagaggctggagtgggtcgcaaccattagtagtggtggtagttacacctactatccagacagtgtgaaggggcgattcaccatctccagagacaatgccaagaacaccctgtacctgcaaatgagcagtctgaagtctgaggacacagccatgtattactgtgcaagacatgggagtaaccgcctgatggactactggggtcaaggaacctcagtcaccgtctcctcagagagtcagtccttcccaaatgtcttcccc
	F81gcd4_MsVHE	Musmus IGHV1-80*01 F	M	1	1	0	1	0	1	0	0	0	5	5	0	7	Musmus IGHJ4*01 F	Musmus IGHD2-13*01 F	3	8.8.14	[14.17.38.11]	CARSGDYLYYYVMDYW	in-frame	+	gtgaggactgggtcctcagtgaagatttcctgcaaggcttctggctatgcattcagtagctactggatgaactgggtgaagcagaggcctggacagggtcttgagtggattggacagatttatcctggagatggtgatactaactacaatggaaagttcaagggtaaagccacactgactgcagacaaatcctccagcacagcctacatgcagctcagcagcctaacatctgaggactctgcggtctatttctgtgcaagatcgggtgattacctctattactatgttatggactactgggatcaaggaacctcagtcaccgtctcctcagagagtcagtccttcccaaattccttc
	F81gce2_MsVHE	Musmus IGHV5-17*02 F	M	0	0	0	0	0	0	0	0	0	0	0	0	0	Musmus IGHJ4*01 F	Musmus IGHD1-1*01 F	2	8.8.14	[13.17.38.11]	CARYLLLRPDYAMDYW	in-frame	+	agtgagcctggagggtcccggaactctcctgtgcaacctctggattcactttcagtagctttggaatgcactgggttcgtcaggctccagagaaggggctggagtgggtcgcatacattagtagtggcagtagtaccatctactatgcagacacagtgaagggccgattcaccatctccagagacaatcccaagaacaccctgttcctgcaaatgaccagtctaaggtctgaggacacggccatgtattactgtgcaagatatttattactacggcctgactatgctatggactactggggtcaaggaacctcagtcaccgtctcctcagagagtcagtccttcccaaatgtcttaccc
	F81gce4_MsVHE	Musmus IGHV1-26*01 F	G2A	3	1	2	5	1	4	3	0	3	10	3	7	21	Musmus IGHJ3*01 F	Musmus IGHD5-1*01 P	3	8.8.7	[14.17.38.11]	CVPAWFAYW	in-frame	+	tgatgagcctggggcttcagtgaagatatcctgcaaggcttctggttactcattcactgactactacatgcactgggtgaagcaaagccatgtaaagagccttgagtggattggacgtattaatccttacagtggtgctactacctaccaccagaatttcaaggacaaggccagcttgactgtagataagtcgtccagcacagcctatatggagctccacagcctgacatctgaggactctgcagtctattactgtgtacccgcctggtttgcttactggggccaagggactctggtcactgtctctgcagccaaaacaacagccccatcggtctatccactggcccctgtgtgtggagatacaactggctcctcggtgactctaggatgcctggtcaa…
	F81gcf2_MsVHE	Musmus IGHV1-5*01 F	M	2	0	2	3	3	0	0	0	0	1	1	0	6	Musmus IGHJ2*01 F	Musmus IGHD1-2*01 F	3	8.8.11	[14.17.38.11]	CTRDYGYDYFDYW	in-frame	+	ggcaggcctggggcttccgtgaagatgtcctgcaaggcttctggctacagctttaccagctactggatgcactgggtaaaacagaggcctggacagggtctagaatggattggtgctatttatcctggaaatagtgatactagttacaaccagaagttcaagggcaaggccaaactgactgcagtcacatccgccagcactgcctacatggagctcagcagcctgacaaatgaggactctgcggtctattactgtacaagagactacggctacgactactttgactactggggccaaggcaccactctcacagtctcctcagagagtcagtccttcccaaattccttc
	F81gcg1_MsVHE	Musmus IGHV3-2*02 F	M	0	0	0	0	0	0	2	1	1	1	0	1	3	Musmus IGHJ2*01 F	Musmus IGHD2-13*01 F	3	9.7.12	[11.17.38.11]	CARWGYDAYYFDYW	in-frame	+	cttctagtctctgtccctcacctgcactgtcactggctactcaatcaccagtgattatgcctggaactggatccggcagtttccaggaaacaaactggagtggatgggctacataaggtacagtggtagcacaagctacaccccatctctcaaaagtcgaatctctatcactcgagacacatccaagaaccagttcttcctgcagttgaattctgtgactactgaggacacagccacatattactgtgcaagatggggatatgatgcctactactttgactactggggccaaggcaccactctcacagtctcctcagagagtcagtccttcccaaattccttc
	F81gch1_MsVHE	Musmus IGHV1S33*01 F	M	1	0	1	2	0	2	2	0	2	0	0	0	5	Musmus IGHJ4*01 F			8.8.11	[14.17.38.11]	CARSYAPNVMDYW (see Functionality comment)	in-frame	+	ggtgagcctggggctttagtgaagatatcctgcaaggcttctggttacaccttcacaaactacgatatacactgggtgaggcagaggcctggacagggacttgagtggattggatgggtttatcctggagatgttagtactaagtacaatgagaaattcaagggcaaggccacactgactgcagacaaatcctccagcacagcctacatgcagctcagcagcctgacttctgagaactctgcagtctatttctgtgcaagatcctatgcccccaatgttatggactactggggtcaaggaacctcagtcaccgtctcctcagagagtcagtccttcccaaattcttc
	F82gca2_MsVHE	Musmus IGHV1-39*01 F	M	1	0	1	3	0	3	3	0	3	5	2	3	12	Musmus IGHJ2*01 F	Musmus IGHD2-4*01 F	3	8.8.9	[8.17.38.11]	CARGDYDFDYW	in-frame	+	agtgaagatatcctgcaaggcttctggttactcattcactggctacaacatgaactgggtgaagcagagcaatggaaagagccttgagtggattggaaatattgatccttactatggtaatactaactacaaccagaagttcaagggcaaggccacattgactgtagacaaatcctccagcacagcctacatgcagctcaagagcctgacatctgaggactctgcagtctattactgtgcaagaggagattacgactttgactactggggccaaggcaccactctcacagtctcctcagagagtcagtccttcccaaatgcttccccct
	F82gca4_MsVHE	Musmus IGHV1-4*01 F, or Musmus IGHV1S26*01 F	M	0	0	0	0	0	0	0	0	0	1	0	1	1	Musmus IGHJ1*01 F	Musmus IGHD2-1*01 F	3	8.8.12	[13.17.38.11]	CARSNGHSWYFDVW	in-frame	+	gcagacctggggcctcagtgaagatgtcctgcaaggcttctggctacacctttactagctacacgatgcactgggtaaaacagaggcctggacagggtctggaatggattggatacattaatcctagcagtggttatactaattacaatcagaagttcaaggacaaggccacattgactgcagacaaatcctccagcacagcctacatgcaactgagcagcctgacatctgaggactctgcagtctattactgtgcaagatctaatggtcactcttggtacttcgatgtctggggcgcagggaccacggtcaccgtctcctcagagagtcagtccttcccaaatgtccttccccc
	F82gcb1_MsVHE	Musmus IGHV1-37*01 F	M	0	0	0	0	0	0	0	0	0	1	0	1	1	Musmus IGHJ4*01 F	Musmus IGHD1-3*01 F	3	8.8.10	[14.17.38.11]	CGRSGYYAMDYW	in-frame	+	ctggtgagcctggggcttcagtgaagatatcctgcaaggcttctggttactcatttactggctactttatgaactgggtgaagcagagccatggaaagagccttgagtggattggacgtattaatccttacaatggtgatactttctacaaccagaagttcaagggcaaggccacattgactgtagacaaatcctctagcacagcccacatggagctcctgagcctgacatctgaggactctgcagtctattattgtggaagaagtggttactatgctatggactactggggtcaaggaacctcagtcaccgtctcctcagagagtcagtccttcccaaattccttc
	F82gcb2_MsVHE	Musmus IGHV2-6-4*01 F	M	0	0	0	0	0	0	0	0	0	2	0	2	2	Musmus IGHJ2*01 F	Musmus IGHD2-2*01 F	3	8.7.11	[12.17.38.11]	CARESWGYEIDYW	in-frame	+	accctcacagagcctgtccatcacatgcactgtctctgggttctcattatccagatatagtgtacactgggttcgccagcctccaggaaagggtctggagtggctgggaatgatatggggtggtggaagcacagactataattcagctctcaaatccagactgagcatcaccaaggacaactccaagagccaagttttcttaaaagtgaacagtctgcaaactgatgacacagccatgtactactgtgccagagagtcttggggttacgaaattgactactggggccaaggcaccactctcacagtctcctcagagagtcagtccttcccaaatgtcttccc
	F82gcc1_MsVHE	Musmus IGHV3-8*02 F	M	0	0	0	0	0	0	0	0	0	0	0	0	0	Musmus IGHJ1*01 F	Musmus IGHD1-1*01 F	3	8.7.13	[12.17.38.11]	CASSHYYGSWYFDVW	in-frame	+	accttctcagactctgtccctcacctgttctgtcactggcgactccatcaccagtggttactggaactggatccggaaattcccagggaataaacttgagtacatggggtacataagctacagtggtagcacttactacaatccatctctcaaaagtcgaatctccatcactcgagacacatccaagaaccagtactacctgcagttgaattctgtgactactgaggacacagccacatattactgtgcaagctcccattactacggtagctggtacttcgatgtctggggcgcagggaccacggtcaccgtctcctcagagagtcagtccttcccaaatgtcttccccc
	F82gcc2_MsVHE	Musmus IGHV1-9*01 F	M	2	0	2	0	0	0	0	0	0	2	0	2	4	Musmus IGHJ4*01 F	Musmus IGHD1-1*01 F	3	8.8.14	[13.17.38.11]	CVRRHYYGSRYAMDYW	in-frame	+	tgatgcctggggcctcagtgaagatatcctgcaaggctactggctacacattcagtagctactggatagagtgggtaaagcagaggcctggacatggccttgagtggattggagagattttacctggaagtggtagtactaactacaatgagaagttcaagggcaaggccacattcactgcagatacatcctccaacacagcctacatgcaactcagcagcctgacatctgaggactctgccgtctattactgtgtaagaaggcattactacggtagtaggtatgctatggactactggggtcaaggaacctcagtcaccgtctcctcagagagtcagtccttcccaaattcttcc
	F82gcc4_MsVHE	Musmus IGHV3-2*02 F	M	0	0	0	0	0	0	0	0	0	1	0	1	1	Musmus IGHJ2*01 F	Musmus IGHD2-4*01 F	3	9.7.12	[12.17.38.11]	CARWRDFDYDFDYW	in-frame	+	accttctcagtctctgtccctcacctgcactgtcactggctactcaatcaccagtgattatgcctggaactggatccggcagtttccaggaaacaaactggagtggatgggctacataagctacagtggtagcactagctaccacccatctctcaaaagtcgaatctctatcactcgagacacatccaagaaccagttcttcctgcagttgaattctgtgactactgaggacacagccacatattactgtgcaagatggagggactttgattacgactttgactactggggccaaggcaccactctcacagtctcctcagagagtcagtccttcccaaattccttc
	F82gcd1_MsVHE	Musmus IGHV1-87*01 F	M	1	1	0	0	0	0	0	0	0	1	0	1	2	Musmus IGHJ1*01 F	Musmus IGHD1-1*01 F	3	8.8.14	[13.17.38.11]	CARGDYGSSYGYFDVW	in-frame	+	gcagacctggggcttcagtgaagttgtcctgcaaggcttcaggctacacctttactagctactggatgcagtgggtaaaacagaggcctggacagggtctggaatggattggggctatttatcctggagatggtgatactaggtacactcagaagttcaagggcaaggccacattgactgcagataaatcctccagcacagcctacatgcaactcagcagcttgacatctgaggactctgcggtctattactgtgcaagaggggactacggtagtagctacgggtacttcgatgtctggggcgcagggaccacggtcaccgtctcctcagagagtcagtccttcccaaattcttccc
	F82gcd4_MsVHE	Musmus IGHV1-18*01 F, or Musmus IGHV1-26*01 F or Musmus IGHV1S135*01 [F] or Musmus IGHV1S29*02 F	M	4	1	3	4	0	4	2	0	2	7	3	4	17	Musmus IGHJ4*01 F	Musmus IGHD5-5*01 ORF	3	8.8.12	[14.17.38.11]	CTRWGLSTGAMDYW	in-frame	+	ctgatgagcctggagcttcatgaagatatcctgcaaggcttctggttactcattcactggctacaccatgaactgggtgaagcagagccatggaaagaaccttgagtggattggacttattactccttacaatggtggtactacctacaaccagaagttcaagggcaaggccacattaactgtagacaagtcatccagcacagccttcatggagctcctcagtctgacatctgaggactctgcagtctattactgtacaagatggggactctctacgggggctatggactactggggtcaaggaacctcagtcaccgtctcctcagagagtcagtccttcccaaatgtcttccccc
	F82gce1_MsVHE	Musmus IGHV1-87*01 F	G2B	1	1	0	1	0	1	1	0	1	2	0	2	5	Musmus IGHJ4*01 F	Musmus IGHD2-3*01 F	1	8.8.10	[13.17.38.11]	CAKGSLYPMDYW	in-frame	+	gcagacctggggcttcagtgaagttgtcctgcaaggcttctggctacacctttactagctactggatgcagtgggtaaaatagaggcctggacagggtctggaatggattggggctatttatcctggagatgatgatactaggtacactcagaagttcaagggcaaggccacattgactgcagataaatcctccagcacagcctacatgcaactcagcagcttggcatctgaggactctgcggtctattactgtgcgaagggttctctctatcctatggactactggggtcaaggaacctcagtcaccgtctcctcagccaaaacaacacccccatcagtctatccactggcccctgggtgtggagatacaactggttcctccgtgactctgggatgcc…
	F82gce2_MsVHE	Musmus IGHV5-12*02 F	M	0	0	0	0	0	0	0	0	0	1	1	0	1	Musmus IGHJ3*01 F	Musmus IGHD2-14*01 F	3	8.8.15	[13.17.38.11]	CARAYYRYDDLSWFAYW	in-frame	+	agtgagcctggagggtccctgaactctcctgtgcaacctctggattcactttcagtgactattacatgtattgggttcgccagactccagagaagaggctggagtgggtcgcatacattagtaatggtggtggtagcacctattatccagacactgtaaagggccgattcaccatctccagagacaatgccaagaacaccctgtacctgcaaatgagccgtctgaagtctgaagacacagccatgtattactgtgcaagagcctactataggtacgacgacctctcctggtttgcttactggggccaagggactctggtcactgtctctgcagagagtcagtccttcccaaatgtccttccccctcaaat
	F82gce4_MsVHE	Musmus IGHV5-17*02 F	G2B	0	0	0	0	0	0	0	0	0	2	0	2	2	Musmus IGHJ2*01 F	Musmus IGHD1-1*01 F	3	8.8.12	[14.17.38.11]	CARLGGDFGGFDYW	in-frame	+	agtgagcctggagggtcccggacactctcctgtgcagcctctggattcactttcagtagctttggaatgcactgggttcgtcaggctccagagaaggggctggagtgggtcgcatacattagtagtggcagtagtaccatctactatacagacacagtgaagggccgattcaccctctccagagacaatcccaagaacaccctgttcctgcaaatgaccagtctaaggtctgaggacacggccatgtattactgtgcaagattgggaggggatttcggcggttttgactactggggccaaggcaccactctcacagtctcctcagccaaaacaacacccccatcagtctatccactggcccctgggtgtggagatacaactggttcctccgtgactctg…
	F82gcf2_MsVHE	Musmus IGHV1S16*01 P	M	2	0	2	3	0	3	0	0	0	4	1	3	9	Musmus IGHJ2*01 F (see comment)	Musmus IGHD1-1*01 F	3	8.8.11	[16.17.38.11]	CTRGDYYGSSDYW	in-frame	+	ctgactggtgagcctggggcttcagtgaagttgtcctgcaaggcttctggctacaccttcaccagctactatatgtactgggtgaagcagaggcctggacaaggccttgagtggattggagagattaatcctagcaatggtggtactaacttcaatgagaagttcaagaacaaggccacactgactgtagacaaatcctccagcacagcatacatgcaactcagcagcctgacatctgaggactctgcggtctattactgtacaagaggggattactacggtagtagcgactactggggccaaggcaccactctcacagtctcctcagagagtcagtccttcccaaatgtcttccccc
	F82gch1_MsVHE	Musmus IGHV1-37*01 F	M	0	0	0	0	0	0	0	0	0	3	1	2	3	Musmus IGHJ2*01 F (see comment)	Musmus IGHD1-1*01 F	1	8.8.10	[14.17.38.11]	CGRSGITTLDYW	in-frame	+	tggtgagcctggggcttcagtgaagatatcctgcaaggcttctggttactcatttactggctactttatgaactgggtgaagcagagccatggaaagagccttgagtggattggacgtattaatccttacaatggtgatactttctacaaccagaagttcaagggcaaggccacattgactgtagacaaatcctccagcacagcccacatggatctcctgagcctgacatctgaggactctgcagtctattattgtggaagatcggggattactacgcttgactactggggccaaggcaccactctcccagtctcctcagagagtcagtccttcccaaatgcccttc
	F83gcb1_MsVHE	Musmus IGHV1-20*01 F, or Musmus IGHV1-20*02 F or Musmus IGHV1-37*01 F	M	1	0	1	1	0	1	0	0	0	4	2	2	6	Musmus IGHJ2*01 F	Musmus IGHD2-1*01 F	3	8.8.7	[15.17.38.11]	CGRNDNDYW	in-frame	+	ctgagtgagcctggggcttcagtgaagatatcgtgcaaggcttctggttactcatttagtggctactttatgaactgggtgaagcagagccatggaaagagccttgagtggattggacgtattaatccttacaatggtgatactttctacaaccaaaggttcaaggggaaggccacattgactgtagacaaatcctctagcacagtccacatggagctccggagcctgacatctgaggactctgcagtctattattgtggaaggaatgataacgactactggggccaaggcaccactctcacagtctcctcagagagtcagtccttcccaaatgtcttccccc
	F83gcb5_MsVHE	Musmus IGHV1S137*01 [F]	G1	0	0	0	0	0	0	1	0	1	4	2	2	5	Musmus IGHJ3*01 F			8.8.13	[14.17.38.11]	CARRGDYGNYGFAYW (see Functionality comment)	in-frame	+	gtgagacctggggtctcagtgaagatttcctgcaagggttctggctacacattcactgattatgctatgcactgggtgaagcagagtcatgcaaagagtctagagtggattggagttattagtacttactttggtgatgctagctacaaccagaagttcaagggcaaggccacaatgactgtagacaaatcctccagcacagcctatatggaacttgccagactgacatctgaggattctgccatctattactgtgcaagaaggggagactatggtaactacgggtttgcttactggggccaagggactctggtcactgtctctgcagccaaaacgacacccccatctgtctatccactggcccctggatctgctgcccaaactaactccatggtgacc…
	F83gcc6_MsVHE	Musmus IGHV1-15*01 F	M	1	0	1	1	0	1	4	1	3	5	1	4	11	Musmus IGHJ2*01 F			8.8.5	[15.17.38.11]	CTRTDYW	in-frame	+	ctggtgaggcctggggcttcagtgaagctgtcctgcaaggctttgggctacacatttactgactataaaatgcactgggtgaagcagacacctgtgcatggcctggaatggattggaactattcatccaggaagtggtggtactgcctacaatcagaagttcaagggcaaggccacactgactgcagacaaatcctccagcacagcctacatggagatcagcagcctgacatctgaggactctgctgtccattactgtacaagaaccgactactggggccaaggcaccactctcacagtctcctcagagagtcagtccttcccaaattcttccc
	F83gcd2_MsVHE	Musmus IGHV1-20*02 F	M	0	0	0	0	0	0	1	0	1	0	0	0	1	Musmus IGHJ3*01 F	Musmus IGHD1-1*01 F	3	8.8.11	[14.17.38.11]	CARGAYYGGFAYW	in-frame	+	tgatgagcctggggcttcagtgaagatatcctgcaaggcttctggttactcatttactggctactttatgaactgggtgatgcagagccatggaaagagccttgagtggattggacgtattaatccttacaatgctgatactttctacaaccagaagttcaagggcaaggccacattgactgtagacaaatcctctagcacagcccacatggagctccggagcctggcatctgaggactctgcagtctattattgtgcaaggggtgcttactacggggggtttgcttactggggccaagggactctggtcactgtctctgcagagagtcagtccttcccaaatgtccttcc
	F83gce1_MsVHE	Musmus IGHV3-2*02 F	M	0	0	0	0	0	0	0	0	0	0	0	0	0	Musmus IGHJ4*01 F	Musmus IGHD2-1*01 F	3	9.7.15	[12.17.38.11]	CARETYGNYVNYAMDYW	in-frame	+	ccttctcagtctctgtccctcacctgcactgtcactggctactcaatcaccagtgattatgcctggaactggatccggcagtttccaggaaacaaactggagtggatgggctacataagctacagtggtagcactagctacaacccatctctcaaaagtcgaatctctatcactcgagacacatccaagaaccagttcttcctgcagttgaattctgtgactactgaggacacagccacatattactgtgcaagagagacttatggtaactacgtgaactatgctatggactactggggtcaaggaacctcagtcaccgtctcctcagagagtcagtccttcccaaatt
	F83gce3_MsVHE	Musmus IGHV2-9*02 F	M	0	0	0	0	0	0	0	0	0	1	0	1	1	Musmus IGHJ2*01 F			8.7.5	[12.17.38.11]	CARTDYW	in-frame	+	cgcctcacagagcctgtccatcacttgcactgtctctgggttttcattaaccagctatggtgtacactgggttcgccagcctccaggaaagggtctggagtggctgggagtaatatgggctggtggaagcacaaattgtaattcggctctcatgtccagactgagcatcagcaaagacaactccaagagccaagttttcttaaaaatgaacagtctgcaaactgatgacacagccatgtactactgtgccagaactgactactggggccaaggcaccactctcacagtctcctcagagagtcagtccttcccaaatatcttc
	F83gcf4_MsVHE	Musmus IGHV1-14*01 F	M	0	0	0	1	0	1	1	0	1	1	0	1	3	Musmus IGHJ3*01 F	Musmus IGHD1-2*01 F	3	8.8.8	[14.17.38.11]	CASHIHLSYW	in-frame	+	tggtagcctggggcttcagtgaagatgtcctgcaaggcttctggatacacattcactagctatgttatgcactgggtgaagcagaagcctgggcagggccttgagtggattggatttattaatccttacaatgatggtactaagtgcaatgagaagttcaaaggcaaggccacactgacttcagacaaatcctccagcacagcctacatggagctcagcagcctgacctctgaggactctgcggtctattactgtgcaagccacattcatctttcttactggggccaagggactctggtcactgtctctgcagagagtcagtccttcccaaatgcccttc
	F83gcf5_MsVHE	Musmus IGHV1S16*01 P	M	2	0	2	5	1	4	0	0	0	2	0	2	9	Musmus IGHJ3*01 F	Musmus IGHD6-3*01 F	3	8.8.6	[14.17.38.11]	CTRSAAYW	in-frame	+	ggtgagcctggggcttcagtgaagttgtcctgcaaggcttctggctacaccttcaccagctactatatgtactgggtgaagcagaggcctggacaaggccttgagtggattggggggattaatcctagcaatggtggtactaacttcaatgagaagttcaagagcaaggccacactgactgtagacaaatcctccagcacagcctacatgcaactcagcagcctgacatctgaggactctgcggtctattactgtacaagaagcgccgcttactggggccaagggactctggtcactgtctctgcagagagtcagtccttcccaaatgtcttccccc
	F83gcf6_MsVHE	Musmus IGHV5-6*01 F, or Musmus IGHV5-6*02 [F] or Musmus IGHV5-6*03 [F] or Musmus IGHV5-6-1*01 F	G3	4	0	4	3	1	2	2	0	2	5	1	4	14	Musmus IGHJ4*01 F	Musmus IGHD2-12*01 F	3	8.8.18	[14.17.38.11]	CARNYCTYDAGDDYYGMDYW	in-frame	+	tagtgagcctggagggtccctgaactctccatgtgcaggctctggattcgctttgagaagatatggcatgtcttggattcgccagattccagacaagaggctggaatgggtcgcaaccattagtagtggtggtaataacacctactatccagacagtgtgaaggggcgattcaccatctccagagacaatgccgggaacaccctttacctgcaaatgagcggtctgaagtctgaggacacagccgtgtattactgtgcaaggaactattgtacttacgacgcgggggatgattactatggtatggactactggggtcacggaacctcagtcaccgtctcctcagctacaacaacagccccatctgtctatcccttggtccctggctgcagtgacacatc…
	F83gcg1_MsVHE	Musmus IGHV3-2*02 F	G2A	0	0	0	0	0	0	0	0	0	0	0	0	0	Musmus IGHJ3*01 F	Musmus IGHD2-10*02 F	3	9.7.9	[12.17.38.11]	CAREGYGNYYW	in-frame	+	accttctcagtctctgtccctcacctgcactgtcactggctactcaatcaccagtgattatgcctggaactggatccggcagtttccaggaaacaaactggagtggatgggctacataagctacagtggtagcactagctacaacccatctctcaaaagtcgaatctctatcactcgagacacatccaagaaccagttcttcctgcagttgaattctgtgactactgaggacacagccacatattactgtgcaagagaggggtatggtaactattactggggccaagggactctggtcactgtctctgcagccaaaacaacagccccatcggtctatccactggcccctgtgtgtggagatacaactggctcctcggtgactctaggatgcctggtcaa…
	F83gcg2_MsVHE	Musmus IGHV1-9*01 F	M	2	0	2	0	0	0	0	0	0	2	0	2	4	Musmus IGHJ3*01 F	Musmus IGHD2-13*01 F	1	8.8.11	[13.17.38.11]	CAREVSTGGFAYW	in-frame	+	tgatgcctggggcctcagtgaagatatcctgcaaggctactggctacacattcagtagctactggatagagtgggtaaagcagaggcctggacatggccttgagtggattggagagattttacctggaagtggtagtactaactacaatgagaagttcaagggcaaggccacattcactgcagatacatcctccaacacagcctacatgcaactcagcagcctgacatctgaggactctgccgtctattactgtgcaagagaggtgtctacgggggggtttgcttactggggccaagggactctggtcactgtctctgcagagagtcagtccttcccaaatgtcttccccc
	F83gcg5_MsVHE	Musmus IGHV1-74*01 F, or Musmus IGHV1-74*04 F	M	0	0	0	4	2	2	3	1	2	6	3	3	13	Musmus IGHJ4*01 F	Musmus IGHD2-3*01 F	3	8.8.13	[13.17.38.11]	CARGDDGYLYAMDYW	in-frame	+	tgagactggggctccagtgaagctgtcctgcaaggcttctggctacaccttcaccagctactggatgaactgggtgaagcagaggcctggacgaggcctcgagtggattggaaggattgatccttccgatagtgaaactcactacaatcaaaagttcaaggacaaggccacactgactgtagacaaatcctccagcacagcctacatccaactcagcagcctgacatctgaggactctgcggtctattattgtgcaagaggggatgatggttacctctatgctatggactactggggtcaaggaacctcagtcaccgtctcctcagagagtcagtccttcccaaatgtcttcccccacatc
	F83gcg6_MsVHE	Musmus IGHV5-12-1*01 F	M	0	0	0	0	0	0	0	0	0	2	0	2	2	Musmus IGHJ3*01 F			8.8.6	[15.17.38.11]	CAREFAYW	in-frame	+	cttagtgagcctggagggtccctgaacctctcctgtgcagcctctggattcgctttcagtagctatgacatgtcttgggttcgccagactccggagaagaggctggagtgggtcgcatacattagtagtggtggtggtagcacctactatccagacactgtgaagggccgattcaccatctccagagacaatgccaagaacatactgtacctgcaaatgagcagtctgaagtctgaggacacagccatgtattactgtgcaagagagtttgcttactggggccaagggactctggtcactgtctctgcagagagtcagtccttcccaaatgtcttccc
	F83gch2_MsVHE	Musmus IGHV1-26*01 F, or Musmus IGHV1-31*01 F or Musmus IGHV1-42*01 F or Musmus IGHV1S30*02 F	G1	4	1	3	5	1	4	4	0	4	8	0	8	21	Musmus IGHJ3*01 F	Musmus IGHD2-2*01 F	3	8.8.13	[14.17.38.11]	CARRDGYGGTWFAYW	in-frame	+	ctgatgagcctggggcttcagtgaagatatcctgcaaggcttctggttactcattcactggctactacatgcactgggtgaagcaaagccatgtaaagagccttgagtggattggacgtattaatcctttcaatggttctactacctacaaccagaatttcaaggacaaggccagcttgactgtagctaagtcctccagcacagcctacatggagctccacagcctgacatctgaggactctgcagtctattactgtgcaagacgggatggttacggggggacctggtttgcttactggggccaagggactctggtcactgtctctgcagccaaaacgacacccccatctgtctatccactggcccctggatctgctgcccaaactaactccatggtga…
E4 boost day 17	Sequence ID	V-GENE and allele	Isotype	CDR1T	CDR1S	CDR1R	FR2T	FR2S	FR2R	CDR2T	CDR2S	CDR2R	FR3T	FR3S	FR3R	Tot Mut	J-GENE and allele	D-GENE and allele	D-REGION reading frame	CDR-IMGT lengths	FR-IMGT lengths	AA JUNCTION	JUNCTION frame	Orientation	Sequence
	F111gce1_MsVHE	Musmus IGHV1-12*01 F	G1	2	0	2	1	0	1	1	0	1	6	3	3	10	Musmus IGHJ3*01 F	Musmus IGHD2-4*01 F	3	8.8.11	[15.17.38.11]	CSLYYDYDAFAYW	in-frame	+	gactggtgagcctggggcctcagtgaagatgtcctgcaaggcttctggctacacatttattagttacaatatgcactgggtaaagcagacacctggacagggcctggaatggattggagctatttatccaggaaatgatgatacttcctacaatcagaagttcaaaggcaaggccacattgactgcagacaaatcctccagcacagcctacatgcagttcagcagcctgacatctgaggactctgcggtctattactgttccctctactatgattacgacgcgtttgcttactggggccaagggactctggtcactgtctctgcagccaaaacgacacccccatctgtctatccactggcccctggatctgctgcccaaactaactccatggtgaccct…
	F111gcd3_MsVHE	Musmus IGHV1-14*01 F	G1	0	0	0	1	1	0	3	0	3	1	0	1	5	Musmus IGHJ2*01 F	Musmus IGHD2-4*01 F	3	8.8.8	[13.17.38.11]	CARWDYGGYW	in-frame	+	ggtagcctggggcttcagtgaagatgtcctgcaaggcttctggatacacattcactagctatgttatgcactgggtgaagcagaagcctgggcagggccttgaatggattggatattttaatccttacaatgatgttactaagtacaatgagaagttcaaaggcaaggccacactgacttcagacaaatcctccagcacagcctacatggagctcagcagcctgacctctgaggactctgcggtcttttactgtgcaagatgggattacgggggctactggggccaaggcaccactctcacagtctcctcagccaaaacgacacccccatctgtctatccactggcccctggatctgctgcccaaactaactccatggtgaccctgggatgcctggtca…
	F111gcd1_MsVHE	Musmus IGHV1-15*01 F	G1	0	0	0	2	1	1	3	0	3	1	0	1	6	Musmus IGHJ2*01 F (see comment)	Musmus IGHD1-1*02 F	3	8.8.8	[16.17.38.11]	CTRGGNLDYW	in-frame	+	tgactggtgaggcctggggcttcagtgacgctgtcctgcaaggcttcgggctacacatttactgactatgaaatacactgggtgaagcagacacctgtgcatggcctggaatggattggagcaattgatcctgaaactgttattactgcctacaatcagaagttcaagggcaaggccacactgactgcagacaaatcctccagcacagcctacatggagctccgcagcctgacatctgaggactctgccgtctattactgtacaagagggggtaaccttgactactggggccaaggcaccactctcacagtctcctcagccaaaacgacacccccatctgtctatccactggcccctggatctgctgcccaaactaactccatggtgaccctgggatgc…
	F111gce4_MsVHE	Musmus IGHV1-15*01 F	M	1	0	1	2	0	2	0	0	0	1	0	1	4	Musmus IGHJ3*01 F			8.8.4	[13.17.38.11]	CTRDNW	in-frame	+	tgaggcctggggcctcagtgacgctgtcctgcaaggcttcgggctacagatttactgactatgaaatgaactgggtgaagcagacacctgtgcagggcctggaatggattggagctattgatcctgaaactggtggtactgcctacaatcagaagttcaagggcaaggccacactgactgcagacaaatcctccagcacagcctacatggagctccgcagcctgacatctgaggactctgccgtctattactgtacaagagataactggggccaagggactctggtcactgtctctgcagagagtcagtccttcccaaatgtcttccccctta
	F111gcg4_MsVHE	Musmus IGHV1-15*01 F	G2A	0	0	0	0	0	0	0	0	0	8	4	4	8	Musmus IGHJ2*03 F	Musmus IGHD1-1*02 F	3	8.8.8	[12.17.38.11]	CTRGGNLDHW	in-frame	+	gcctggggcttcagtgacgctgtcctgcaaggcttcgggctacacatttactgactatgaaatgcactgggtgaagcagacacctgtgcatggcctggaatggattggagctattgatcctgaaactggtggtactgcctacaatcaaaagttcaagggcaaggccacactgactgcaaacaaatcctccaccacggcctacatggaactccgcaacctgacatctgaggactcagccgtctattactgtacaagagggggtaaccttgaccactggggccaaggcaccattctcacagtctcctcagccaaaacaacagccccatcggtctatccactggcccctgtgtgtggagatacaactggctcctcggtgactctaggatgcctggtcaaggg…
	F111gcg3_MsVHE	Musmus IGHV1-26*01 F	M	3	1	2	6	2	4	4	1	3	9	1	8	22	Musmus IGHJ3*01 F	Musmus IGHD2-3*01 F	3	8.8.11	[16.17.38.11]	CTRGWYDGYYAYW	in-frame	+	tgagctggtgagcctggggcttcagtgaagatatcctgcaaggcctctggttactcattcactgactactacatgcactgggtgaaacaaagccatgtaaagagccttgagtggattggacgtattaatccgtacaatggtgccactagctacaaccagaatttcagggacaaggccagcttgactgtagataagtcctccagcatagcctacatggagctccacagcctgacatctgacgactctgcagtctattactgtacaagaggctggtatgatggttactacgcttactggggccaagggactctggtcactgtctctgcagagagtcagtccttcccaaatgtccttccc
	F111gcc3_MsVHE	Musmus IGHV1-37*01 F	G1	0	0	0	2	1	1	1	0	1	4	1	3	7	Musmus IGHJ1*01 F	Musmus IGHD2-4*01 F	3	8.8.14	[13.17.38.11]	CERGNYDYDNWYFDVW	in-frame	+	gtgagcctggggcttcagtgaagatatcctgtaaggcttctggttactcatttactggctactttatgaactgggtgaagcagagccatggaaggagtcttgagtggattggacgtactaatccttacaatggtgatactttctacaaccagaaattcagggccaaggccacattgactgtagacaaatcctctagcacagcccacatggagctcctgagcctgacatctgaggactctgcagtctattattgtgaaagggggaactatgattacgacaactggtacttcgatgtctggggcgcagggaccacggtcaccgtctcctcagccaaaacgacacccccatctgtctatccactggcccctggatctgctgcccaaactaactccatggtga…
	F111gca1_MsVHE	Musmus IGHV1-61*01 F	M	0	0	0	4	0	4	4	2	2	1	0	1	9	Musmus IGHJ2*01 F (see comment)	Musmus IGHD2-4*01 F	1	8.8.9	[14.17.38.11]	CAQDLITTGCW	in-frame	+	ggtgaggcctggggcttcagtgaagctgtcctgcaaggcttctggctacaccttcaccagctactggatgaactgggtgaagcagaggcctggacaaggccttgaatggattggtatgattgatccttcagacagtgaaactcactacaatcaaatgttcaaggacaaggccacattgactgtagacaaatcctccagcacagcctacatgcagctcagcagcctgacatctgaggactctgcggtctattactgtgcccaagatctgattacgactggctgctggggccaaggcaccactctcacagtctcctcagagagtcagtccttcccaaatgtcttcccccttacc
	F111gca3_MsVHE	Musmus IGHV1-87*01 F	M	2	1	1	1	1	0	0	0	0	6	1	5	9	Musmus IGHJ2*01 F (see comment)	Musmus IGHD3-3*01 F	2	8.8.6	[13.17.38.11]	CARGGDYW	in-frame	+	agacctggggcttcagtgaagttgtcctgcaaggcttctggctacacctttactaggtactggatgcagtgggtaaagcagaggcctggacagggtctggaatggattggggctatttatcctggagatggtgatactaggtacactcagaagttcaaggacaaggccacattgactgcggataaatcctccaggacagcctacatgcaattcagcagcttggcatctgaggactctgcggtctattactgtgcaagagggggggattactggggccaaggcaccactctcacagtctcctcagagagtcagtccttcccaaatgtcttccccctccac
	F111gcb1_MsVHE	Musmus IGHV1-87*01 F	G1	3	0	3	0	0	0	1	0	1	4	0	4	8	Musmus IGHJ1*01 F	Musmus IGHD1-1*01 F	2	8.8.14	[15.17.38.11]	CATMGLLQSYWYFDVW	in-frame	+	gagctggcagacctggggcttcagtgaagttgtcctgcaaggcttctggctacacctttagtaggtactggatgcagtgggtaaaacagaggcctggacagggtctggaatggattggggctatttatcctggatatggtgatacttggtacactcagaagttcaagggcaaggccacattgactgcagataaatcctccagcacagcctacatgcaactcagcaggttggcatctgaggactctgcggtctattactgtgcaactatgggcttactacaaagctactggtatttcgatgtctggggcgcagggaccacggtcaccgtctcctcagccaaaacgacacccccatctgtctatccactggcccctggatctgctgcccaaactaactcca…
	F111gcc2_MsVHE	Musmus IGHV1-87*01 F	G1	2	1	1	0	0	0	0	0	0	3	0	3	5	Musmus IGHJ1*01 F	Musmus IGHD2-3*01 F	2	8.8.14	[14.17.38.11]	CASMGLLQTYWYFDVW	in-frame	+	ggcagacctggggcttcagtgaagttgtcctgcaaggcttctggctacacctttactaggtactggatgcagtgggtaaaacagaggcctggacagggtctggaatggattggggctatttatcctggagatggtgatactaggtacactcagaagttcaaggacaaggccacattgactgcagataaatcctccagcacagcctacatgcaactcagcagcttgtcatctgaggactctgcggtctattactgtgcaagtatggggttactacaaacctactggtacttcgatgtctggggcgcagggaccacggtcaccgtctcctcagccaaaacgacacccccatctgtctatccactggcccctggatctgctgcccaaactaactccatggtg…
	F111gcf2_MsVHE	Musmus IGHV1-87*01 F	G2A	1	1	0	1	0	1	0	0	0	2	0	2	4	Musmus IGHJ4*01 F	Musmus IGHD2-2*01 F	2	8.8.18	[13.17.38.11]	CAREGVIGLRREYYYGMDYW	in-frame	+	gcagacctggggcttcagtgaagttgtcctgcaaggcttctggctacacctttacaagctactggatgcagtgggtaaaatagaggcctggacagggtctggaatggattggggctatttatcctggagatggtgatactaggtacactcagaagttcaagggcaaggccacattgactgcagataaatcctccagcacagcctacatgcaactcagcagcttggcatctgaggactctgcggtctattactgtgcaagagagggggtaataggtttacgacgggaatattactatggtatggactactggggtcaaggaacctcagtcaccgtctcctcagccaaaacaacagccccatcggtctatccactggcccctgtgtgtggagatacaactg…
	F111gcf1_MsVHE	Musmus IGHV10-1*02 F	M	0	0	0	0	0	0	1	0	1	1	0	1	2	Musmus IGHJ4*01 F	Musmus IGHD2-3*01 F	3	8.10.10	[12.17.38.11]	CVRLDGYSRGYW	in-frame	+	gcctaaagggtcattgaaactctcatgtgcagcctctggattcaccttcaatacctacgccatgaactgggtccgccaggctccaggaaagggtttggaatgggttgctcgcataagaagtaaaagtaataattattcaacatattatgccgattcagtgaaagacaggttcaccatctccagagatgattcacaaagcatgctctatctgcaaatgaacaagttgaaaactgaggacacagccatgtattactgtgtgagacttgatggttactcccggggctattggggtcaaggaacctcagtcaccgtctcctcagagagtcagtccttcccaaatgtcttccccctacctacg
	F111gch3_MsVHE	Musmus IGHV11-2*02 F	M	0	0	0	1	1	0	1	0	1	1	0	1	3	Musmus IGHJ1*01 F	Musmus IGHD1-1*02 F	3	8.8.11	[14.17.38.11]	CMRYGHYWYFDIW	in-frame	+	tggtgcacctggggggtcacggggactctcttgtgaaggctcagggtttacttttagtggcttctggatgagttgggttcgacagacacctgggaagaccctggagtggattggagacattaattctgatggcagtgcagtaaactacgcaccatccataaaggatcgattcactatcttcagagacaatgacaagaccaccctgtacctgcagatgagcaatgtgcgatctgaggacacagccacgtatttctgtatgagatatggtcactactggtacttcgatatctggggcgcagggaccacggtcaccgtctcttcagagagtcagtccttcccaaatgtcttcccccttatc
	F111gcf4_MsVHE	Musmus IGHV14-3*02 F	M	2	1	1	1	1	0	0	0	0	2	1	1	5	Musmus IGHJ3*01 F			8.8.5	[12.17.38.11]	CWKFTYW	in-frame	+	gagcaggggcctcagtcaagttgtcctgcacagcttctggcttcaacattaaagactcctacatgcactgggtgaaacagaggcctgaacagggcctggagtggattggaaggattgatcctgcgaatggtaatactaaatatgacccgaaattccagggcaaggccactataacagcagacacatcctccaacacagcctacctgcagctcagcggcctgacatctgaggacactgccgtctattactgttggaagtttacttactggggccaagggactctggtcactgtctctgcagagagtcagtccttcccaaatgcctttc
	F111gcc4_MsVHE	Musmus IGHV14-4*02 F	M	0	0	0	2	0	2	0	0	0	4	1	3	6	Musmus IGHJ2*01 F (see comment)	Musmus IGHD4-1*01 F	1	8.8.9	[12.17.38.11]	CNAITGIFDYW	in-frame	+	ggtaggggcctcagtcaagttgtcctgcacagcctctggcttcaacattaaagactactatattcagtgggtgaagcagaggcctgaacagggcctggagtggattggatggattgatcctgagaatggtgatactgaatatgccccgaagttccagggcaaggccactatgactgcagacacatcctccaacacagcctacctgcaactcaggagcctgacatctgaggacactgccgtctatttatgtaatgcaataactgggatctttgactactggggccaaggcaccactctcacagtctcctcagagagtcagtccttcccaaatgtctttc
	F111gcd4_MsVHE	Musmus IGHV2-6-1*01 F	M	2	0	2	0	0	0	3	0	3	3	0	3	8	Musmus IGHJ4*01 F	Musmus IGHD1-1*01 F	3	8.7.16	[14.17.38.11]	CARHRDYGSRDYYAMDYW	in-frame	+	tgatggcgccctcacagagcctgtccatcacatgcgccatctcagggttctcattaaccgactatggtgtacactgggttcgccagcctccaggaaagggtctggagtggctggtagtgatatttagtgatggaagcgcaacctataattcaggtctcaaatccagactgagcatcaggaaggacaactccaagagccaagttttcttacaaatgaacagtctccaaactgatgacacagccatgtactactgtgccagacatagagactacggtagtagggattactatgctatggactactggggtcaaggaacctcagtcaccgtctcctcagagagtcagtccttcccaaattcttc
	F111gch2_MsVHE	Musmus IGHV3-1*02 F	G1	0	0	0	1	0	1	0	0	0	0	0	0	1	Musmus IGHJ1*01 F	Musmus IGHD2-10*02 F	3	9.7.12	[12.17.38.11]	CARPYGSYLFFDVW	in-frame	+	gaccttctcagtcactttcactcacctgcactgtcactggctactccatcaccagtggttatagctggcactggatccggcagtttccaggaaacaaactggaatggatggtctacatacactacagtggtagcactaactacaacccatctctcaaaagtcgaatctctatcactcgagacacatccaagaaccagttcttcctgcagttgaattctgtgactactgaggacacagccacatattactgtgcaagaccgtatggtagctacttgttcttcgatgtctggggcgcagggaccacggtcaccgtctcctcagccaaaacgacacccccatctgtctatccactggcccctggatctgctgcccaaactaactccatggtgaccctgggat…
	F111gce3_MsVHE	Musmus IGHV5-9-1*01 F	M	1	0	1	0	0	0	1	0	1	0	0	0	2	Musmus IGHJ2*01 F (see comment)	Musmus IGHD4-1*01 F	1	8.8.13	[9.17.38.11]	CGRQGQGTGTPLDYW	in-frame	+	gtccctgaactctcctgtgcagcctctggattcattttcagtagctatgccatgtcttgggttcgccagactccggagaagaggctggagtgggtcgcaaccattagtagtggtggtaattacacctactatccagacagtgtgaaggggcgattcaccatctccagagacaatgccaagaacaccctgtacctgcaaatgagcagtctgaggtctgaggacacggccatgtattactgtggaagacagggacaggggactgggacaccccttgactactggggccacggcaccactctcacagtctcctcagagagtcagtccttcccaaatgtcttcccccatatcg
	F113gcf2_MsVHE	Musmus IGHV1-18*01 F	G3	5	1	4	4	0	4	1	0	1	7	3	4	17	Musmus IGHJ2*01 F			8.8.6	[12.17.38.11]	CARDFDYW	in-frame	+	gagcctggagcttcatgaagatttcctgcaaggcttctggttactcattcactggctacatgatggactgggtgaagcagacccatggaaagaaccttgagtggattggacttattaatccttacaatggtggtactacctacaaccagaagttcaagggcaaggccacattaactgtagacaagtcatccagcacagcctacatggacctcctcagtctgacatctgaggactctgcagtctattactgtgcaagggactttgactactggggccaaggcaccactctcacagtctcctcagctacaacaacagccccatctgtctatcccttggtccctggctgcagtgacacatctggatcctcggtgacactgggatgccttgtcaagggctact…
	F113gcf4_MsVHE	Musmus IGHV1-18*01 F (see comment)	G1	4	1	3	4	0	4	4	0	4	8	4	4	20	Musmus IGHJ4*01 F	Musmus IGHD4-1*01 F	3	8.8.6	[14.17.38.11]	CARGEDYW	in-frame	+	gctggtgagcctggagcttcatgaggatatcctgcaagacttctggttactcattcactggctacaccatgaactgggtgaagcagagccatggaaagacccttgagtggattggacttattaatcctttcaatggtagttctatctacaaccagaagttcaagggcaaggccacattaactgtagccaagtcatccagtacagcctacatggacctcctcagtctgacatctgaggactctgcagtctattactgtgcaagaggggaggactactggggtcaaggaacctcagtcaccgtctcctcagccaaaacgacacccccatctgtctatccactggcccctggatctgctgcccaaactaactccatggtgaccctgggatgcctggtcaagg…
	F113gcc4_MsVHE	Musmus IGHV1-26*01 F	G1	3	1	2	4	0	4	2	0	2	4	3	1	13	Musmus IGHJ2*01 F	Musmus IGHD2-2*01 F	3	8.8.12	[15.17.38.11]	CAREGNGYDYFAYW	in-frame	+	ctgagtgagcctggggcttcagtgaagatatcctgcaaggcttctggttactcgttcactgtctactacatgcactgggtgaagcagagccatggaaagagccttgactggattggacgtgttaatccttacaatggtggtactagctacaaccagaagttcaagggcaaggccatattaactgtagacaagtcatccagcacagcctacatggagctccgcagcctgacatctgaggactctgcggtctattactgtgcaagagagggaaatggttacgactactttgcctactggggccaaggcaccactctcacagtctcctcagccaaaacgacacccccatctgtctatccactggcccctggatctgctgcccaaactaactccatggtgacc…
	F113gca2_MsVHE	Musmus IGHV10-1*02 F	G1	0	0	0	1	0	1	1	0	1	4	1	3	6	Musmus IGHJ3*01 F, or Musmus IGHJ3*02 P	Musmus IGHD2-3*01 F	3	8.10.13	[13.17.38.11]	CVRHEGAYGLGFVYW	in-frame	+	gtgagcctaagggtcattgaaactctcatgtgcagcctctggattcaccttcaatacctacgccatgaactgggtccgccaggctccaggaaagggtttggaatgggatgctcgcataagaagtaaaagtaatgattatgcaacattttatgccgattcagtgaaagacaggttcaccatctccagagatgattcgcaaaacatgctctatctgcaaatgaccaacttgaaaactgaggacacagccatgtattactgtgtgagacatgagggggcctatggcctagggtttgtttattggggccaagggactctggtcactgtctctgcagccaaaacgacacccccatctgtctatccactggcccctggatctgctgcccaaactaactccatggt…
	F113gce5_MsVHE	Musmus IGHV1S135*01 [F]	G2A	1	0	1	3	1	2	0	0	0	8	3	5	12	Musmus IGHJ3*01 F	Musmus IGHD2-2*01 F	3	8.8.11	[14.17.38.11]	CAREGGYGGFAYW	in-frame	+	ctgagagcctggggcttcagtgaagatatcctgcaaggcttctggttactcattcactggctacaacatgtactgggtgaagcagagccataggaaaagccttgagtggattggatatattgatccttacaatggtggtacttactacaaccagaagtccaagggcaaggccacattgactgtagacaaatcttccagcacagcctacatgcatctcaacagcctgacatctgaggactctgcaatctattactgtgcaagagaggggggttacggggggtttgcttactggggccaagggactctggtcactgtctctgcagccaaaacaacagccccatcggtctatccactggcccctgtgtgtggagatacaactggctcctcggtgactctagg…
	F113gcg1_MsVHE	Musmus IGHV1S34*01 F	M	1	0	1	0	0	0	2	0	2	2	0	2	5	Musmus IGHJ3*01 F			8.8.14	[14.17.38.11]	CAREGSDGYGAGFAYW (see Functionality comment)	in-frame	+	cagtgagactggggcttcagtgaagatatcctgcaaggcttctggttactcattcactgcttactacatgcactgggtcaagcagagccatggaaagagccttgagtggattggatatattaattgttacaatggtggtactagctacaaccagaagttcaagggcaaggcctcatttactgtagacacatcctccagcacagcctacatgcagttcagcagcctgacatctgaagactctgcggtctattactgtgcaagggaagggagtgatggttacggcgccgggtttgcttactggggccaagggactctggtcactgtctctgccgagagtcagtccttcccaaattcttc
	F113gcb2_MsVHE	Musmus IGHV1S50*01 F, or Musmus IGHV1S56*01 F	G1	2	0	2	2	0	2	2	0	2	5	0	5	11	Musmus IGHJ4*01 F	Musmus IGHD2-4*01 F	3	8.8.15	[14.17.38.11]	CARSDYDYEEGYAMDYW	in-frame	+	gggtgagcctggggcttcagtaaagatgtcctgccaggcttctggctacaccttcacaacctactatttacactgggtgaaacagaggcctggacagggacttgagtggattggatggatttatcctggagatggtattattaggtacaatgagaagttcaagggcaggaccacactgactgcagacaaatcctccagcacagcctacatgttgctcagcagcctgacctctgaggactctgcgatctatttctgtgcaaggtcggactatgattacgaggagggctatgctatggactactggggtcaaggaacctcagtcaccgtctcctcagccaaaacgacacccccatctgtctatccactggcccctggatctgctgcccaaactaactccat…
	F113gcg2_MsVHE	Musmus IGHV1S56*01 F	G2A	2	0	2	1	0	1	3	0	3	6	1	5	12	Musmus IGHJ3*01 F			8.8.11	[15.17.38.11]	CSMGDDEAWFAYW (see Functionality comment)	in-frame	+	gagctggtgagcctggggcttcagtgaagatgtcctgcaaggcttctggctacaccttcacaacctactatatacactgggtgaggcagaggcctggacagggacttgagtggattggatggaattatcctggagatggttctactaagtacaatgagaagttcaagggcaagaccacactgattgcagacaaatcctccagcacagcctacatgttcctcagcagcctgacctctgaggactctgcgatctatttctgttcaatgggtgacgacgaggcctggtttgcttactggggccaagggactctggtcactgtctctgcagccaaaacaacagccccatcggtctatccactggcccctgtgtgtggagatacaactggctcctcggtgactc…
	F113gcb1_MsVHE	Musmus IGHV2-6-7*01 F, or Musmus IGHV2-6-7*02 F	M	1	0	1	1	1	0	1	1	0	5	2	3	8	Musmus IGHJ2*01 F (see comment)	Musmus IGHD2-4*01 F	2	8.7.17	[11.17.38.11]	CAREREREGESL*LRVDYW	in-frame	+	cctcacagagcctgtccatcacatgcaccgtctcagggttctcattaaccggctgtggtgtaaattgggttcgccagcctccaggaaagggtctggagtggctgggaatgatatggggtgatggaagtacagactataattcagttctcaaatccagactgaccatcaacaaggacaactccaagagccaagttttcttaaaaatgaacagtctgcaaactgatgacacagccagatactattgtgccagagagagagagagagagggagagtccctttgattacgtgtggactactggggccaaggcaccactctcacagtctcctcagagagtcagtccttcccaaatgtcttcccc
	F113gca1_MsVHE	Musmus IGHV3-1*02 F	M	0	0	0	0	0	0	1	0	1	0	0	0	1	Musmus IGHJ1*01 F	Musmus IGHD2-10*02 F	3	9.7.12	[12.17.38.11]	CARPYGSYWFFDVW	in-frame	+	gaccttctcagtcactttcactcacctgcactgtcactggctactccatcaccagtggttatagctggcactggatccggcagtttccaggaaacaaactggaatggatgggctacatacactacagtgatagcactaactacaacccatctctcaaaagtcgaatctctatcactcgagacacatccaagaaccagttcttcctgcagttgaattctgtgactactgaggacacagccacatattactgtgcaagaccgtatggtagctactggttcttcgatgtctggggcgcagggaccacggtcaccgtctcctcagagagtcagtccttcccaaatgccttcc
	F113gcd5_MsVHE	Musmus IGHV3-6*02 F	G1	1	0	1	2	0	2	2	0	2	3	1	2	8	Musmus IGHJ4*01 F	Musmus IGHD3-2*01 F	3	9.7.11	[14.17.38.11]	CARETLGDAMDYW	in-frame	+	ctcgtgaccttctcagtctctgtctctcacctgctctgtcactggctactccatcgccagtggttattactggacttggatccggcagtttccaggaaacaaactggaatggatgggctacataaggtacgacggtaccaataactacaagccatctctcaaaaatcgaatctccatcactcgtgacacatctaagaaccagtttttcctgaagttgacttctgtgactactgaagacacagctacatattactgtgcgagagagacactcggggatgctatggactactggggtcaaggaaccacagtcaccgtctcctctgccaaaacgacacccccatctgtctatccactggcccctggatctgctgcccaaactaactccatggtgaccctggg…
	F113gce3_MsVHE	Musmus IGHV3-6*02 F	G3	2	1	1	1	0	1	1	0	1	3	0	3	7	Musmus IGHJ1*01 F	Musmus IGHD2-10*01 F	2	9.7.13	[12.17.38.11]	CAREILLSHWYFDVW	in-frame	+	acttctcagtctctgtcgctctcctgctctgtcactgactactccataaccagtggttattactggaactggatccggcagtttccaggaaacaaactggaatggatggcctacataagctacgacggtagcaaaagctacaacccatatatcaaaaatcgaatctccatcactcgtgacacatctaagaaccagtttttcctgaagttgaattctgtgactactgaggacacagctacatattactgtgcaagagagatcctactatcccactggtacttcgatgtctggggcgcagggaccacggtcaccgtctcctcagctacaacaacagccccatctgtctatcccttggtccctggctgcagtgacacatctggatcctcggtgacactggga…
	F113gcd2_MsVHE	Musmus IGHV5-4*02 F	M	0	0	0	0	0	0	1	0	1	1	1	0	2	Musmus IGHJ3*01 F	Musmus IGHD2-2*01 F	3	8.8.10	[15.17.38.11]	CAVHGSASFTSW	in-frame	+	gcttagtgagcctggagggtccctgaaactctcctgtgcagcctctggattcactttcagtgactattacatgtattgggttcgccagactccggaaaagaggctggagtgggtcgcaaccattagtgatggtggtacttacacctactatccagacagtgtgaaggggcgattcaccatctccagagacaatgccaagaacaacctgtacctgcaaatgagcagtctgaaatctgaggacacagccatgtattactgtgcagtccatggttccgcctcttttacttcctggggccaagggactctggtcactgtctctgcagagagtcagtccttcccaaattccttc
E4 prime day 7	Sequence ID	V-GENE and allele	Isotype	CDR1T	CDR1S	CDR1R	FR2T	FR2S	FR2R	CDR2T	CDR2S	CDR2R	FR3T	FR3S	FR3R	Tot Mut	J-GENE and allele	D-GENE and allele	D-REGION reading frame	CDR-IMGT lengths	FR-IMGT lengths	AA JUNCTION	JUNCTION frame	Orientation	Sequence
	M61a3_MsVHE	Musmus IGHV2-9*02 F	G3	0	0	0	0	0	0	0	0	0	1	0	1	1	Musmus IGHJ1*01 F	Musmus IGHD2-14*01 F	2	7.7.13	[X.17.38.11]	CARHEVRGNWYFDVW	in-frame	+	ggttttcattaaccagctatggtgtacactgggttcgccagcctccaggaaagggtctggagtggctgggagtaatatgggctggtggaagcacaaattataattcggctctcatgtccagactgagcatcagcaaagacaactccaagagccaagttttcttaaaaatgaacagtctgcaaactgatgacacagccatgtacttctgtgccagacatgaggtaagaggaaactggtacttcgatgtctggggcgcagggaccacggtcaccgtctcctcagctacaacaacagccccatctgtctatcccttggtccctggctgcagtgacacatctggatcctcggtgacactgggatgccttgtcaaaggctatttcc
	M61a4_MsVHE	Musmus IGHV2-9*02 F	M	0	0	0	1	0	1	0	0	0	1	1	0	2	Musmus IGHJ2*01 F			8.7.5	[7.17.38.11]	CARTDYW	in-frame	+	gtcaatcacttgcactgtctctgggttttcattaaccagctatggtgtacactgggttcgccaccctccaggaaagggtctggagtggctgggagtaatatgggctggtggaagcacaaattataattcggctctcatgtccagactgagcatcagcaaagacaactccaagagccaagttttcttaaaaatgaacagtctgcaaactgatgacacagccatgtattactgtgccagaactgactactggggccaaggcaccactctcacagtctcctcagagagtcagtccttcccaaatgcccttccacctagat
	M61a6_MsVHE	Musmus IGHV2-9*02 F	M	0	0	0	1	0	1	0	0	0	0	0	0	1	Musmus IGHJ4*01 F	Musmus IGHD1-1*01 F	3	8.7.13	[7.17.38.11]	CAIYYGSRGYAMDYW	in-frame	+	agtcaatcacttgcactgtctctgggttttcattaaccagctatggtgtacactgggttcgccagcctccaggaaagggtctggagtggctgggaataatatgggctggtggaagcacaaattataattcggctctcatgtccagactgagcatcagcaaagacaactccaagagccaagttttcttaaaaatgaacagtctgcaaactgatgacacagccatgtactactgtgccatttactacggtagtcggggctatgctatggactactggggtcaaggaacctcagtcaccgtctcctcagagagtcagtccttcccaaattcattcc
	M61b1_MsVHE	Musmus IGHV14-3*02 F	M	0	0	0	3	0	3	0	0	0	0	0	0	3	Musmus IGHJ3*01 F	Musmus IGHD2-3*01 F	3	8.8.12	[8.17.38.11]	CGRSIYDGYYGVYW	in-frame	+	agtcagttgtcctgcacagcttctggcttcaacattaaagacacctatattcactggttgaaccagaggcctgaacagggcctggagtggattggaaggattgatcctgcgaatggtaatactaaatatgacccgaagttccagggcaaggccactataacagcagacacatcctccaacacagcctacctgcagctcagcagcctgacatctgaggacactgccgtctattactgtggtagatcaatctatgatggttactacggagtttactggggccaagggactctggtcactgtctctgcagagagtcagtccttcccaaattcttccc
	M61b2_MsVHE	Musmus IGHV1S135*01 [F]	G1	4	1	3	0	0	0	0	0	0	1	0	1	5	Musmus IGHJ2*01 F (see comment)	Musmus IGHD1-1*01 F	3	6.8.13	[X.17.38.11]	CARWGFYGSRPLDYW	in-frame	+	tgcattcactagctacaacatgtactgggtgaagcagagccatggaaagagccttgagtggattggatatattgatccttacaatggtggtactagctacaaccagaagttcaagggcaaggccacattgactgttgacaagtcctccagcacagcctacatgcatctcaacagcctgacatctgaggactctgcagtctattactgtgcaagatgggggttctacggtagtagaccccttgactactggggccaaggcaccactctcacagtctcctcagccaaaacgacacccccatctgtctatccactggcccctggatctgctgcccaaactaactccatggtgaccctgggatgcctggtcaagggttaaa
	M61b6_MsVHE	Musmus IGHV14-3*02 F	G1	5	1	4	2	0	2	0	0	0	1	0	1	8	Musmus IGHJ3*01 F	Musmus IGHD2-3*01 F	3	7.8.12	[X.17.38.11]	CARSIYDGYYGAYW	in-frame	+	gcaacacattaaagacacctatatgtattgggtgaagcagaggcctgaacagggcctggagtggattggaaggattgatcctgcgaatggtaatactaaatatgacccgaagttccagggcaaggccactgtaacagcagacacatcctccaacacagcctacctgcagctcagcagcctgacatctgaggacactgccgtctattactgtgctagatcaatctatgatggttactacggagcttactggggccaagggactctggtcactgtctctgcagccaaaacgacacccccatctgtctatccactggcccctggatctgctgcccaaactaactccatggtgaccctgggatgcctggtcaagggctctccc
	M61c1_MsVHE	Musmus IGHV3-2*02 F	G1	4	0	4	0	0	0	1	0	1	2	2	0	7	Musmus IGHJ4*01 F	Musmus IGHD4-1*01 F	2	9.7.9	[X.17.38.11]	CAKLGHAMDFW	in-frame	+	gcgatctcaatcaccagtgattatgcctggaactggatccggcagtttccaggaaacaaactggagtggatgggctacataagctacagtggtagccctagctacaacccatctctcaaaagtcgaatctctatcactcgagacacatccaagaaccagttcttcctacagttgaattctgtgactactgaggacacagccacgtattactgtgcaaaactgggacatgctatggacttctggggtctaggaacctcagtcaccgtctcctcagccaaaacgacacccccatctgtctatccactggcccctggatctgctgcccaaactaactccatggtgaccctgggatgcctggtcaagggctatatc
	M61c4_MsVHE	Musmus IGHV14-3*02 F	M	0	0	0	0	0	0	0	0	0	0	0	0	0	Musmus IGHJ2*01 F	Musmus IGHD2-10*01 F	2	8.8.10	[7.17.38.11]	CASLPGYFFDYW	in-frame	+	caatgttgtcctgcacagcttctggcttcaacattaaagacacctatatgcactgggtgaagcagaggcctgaacagggcctggagtggattggaaggattgatcctgcgaatggtaatactaaatatgacccgaagttccagggcaaggccactataacagcagacacatcctccaacacagcctacctgcagctcagcagcctgacatctgaggacactgccgtctattactgtgctagcctccctgggtacttctttgactactggggccaaggcaccactctcacagtctcctcagagagtcagtccttcccaaattcttcc
	M61c6_MsVHE	Musmus IGHV5-17*02 F	M	0	0	0	0	0	0	0	0	0	1	0	1	1	Musmus IGHJ2*01 F	Musmus IGHD2-10*01 F	3	8.8.14	[8.17.38.11]	CARSADYGNYYYFDYW	in-frame	+	ccggaactctcctgtgcagcctctggattcactttcagtagctttggaatgcactgggttcgtcaggctccagagaaggggctggagtgggtcgcatacattagtagtggcagtagtaccatctactatgcagacacagtgaagggccgattcaccatctccagagacaatcccaagaacaccctgttcctgcaaatgaccagtctaaggtctgaggacacggccatgtatttctgtgcaagatcagccgactatggtaactactactattttgactactggggccaaggcaccactctcacagtctcctcagagagtcagtccttcccaaattccttt
	M61d1_MsVHE	Musmus IGHV2-9*02 F	M	0	0	0	0	0	0	0	0	0	3	2	1	3	Musmus IGHJ3*01 F	Musmus IGHD1-1*02 F	3	8.7.12	[7.17.38.11]	CARGGGNSAWFANW	in-frame	+	agtccatcacttgcactgtctctgggttttcattaaccagctatggtgtacactgggttcgccagcctccaggaaagggtctggagtggctgggagtaatatgggctggtggaagcacaaattataattcggctctcatgtccagactgagaatcagtaaagacaattccaagagccaagttttcttaaaaatgaacagtctgcaaactgatgacacagccatgtactactgtgccagagggggcggtaactccgcctggtttgctaactggggccaagggactctggtcactgtctctgcagagagtcagtccttcccaaatgccttt
	M61d2_MsVHE	Musmus IGHV3-2*02 F	M	0	0	0	0	0	0	0	0	0	0	0	0	0	Musmus IGHJ2*01 F (see comment)	Musmus IGHD2-14*01 F	3	9.7.10	[7.17.38.11]	CARGGYGLFDYW	in-frame	+	gtaactcacctgcactgtcactggctactcaatcaccagtgattatgcctggaactggatccggcagtttccaggaaacaaactggagtggatgggctacataagctacagtggtagcactagctacaacccatctctcaaaagtcgaatctctatcactcgagacacatccaagaaccagttcttcctgcagttgaattctgtgactactgaggacacagccacatattactgtgcaagaggggggtacggactttttgactactggggccaaggcaccactctcacagtctcctcagagagtcagtccttcccaaattcttccc
	M61d3_MsVHE	Musmus IGHV3-1*02 F	M	1	0	1	0	0	0	1	1	0	0	0	0	2	Musmus IGHJ3*01 F	Musmus IGHD2-1*01 F	3	9.7.7	[7.17.38.11]	CAYGNFAYW	in-frame	+	cttcactcacctgcactgtcactggctactccatcaccagtggttataactggcactggatccggcagtttccaggaaacaaactggaatggatgggctacatacattacagtggtagcactaactacaacccatctctcaaaagtcgaatctctatcactcgagacacatccaagaaccagttcttcctgcagttgaattctgtgactactgaggacacagccacatattactgtgcatatggtaactttgcttactggggccaagggactctggtcactgtctctgcagagagtcagtccttcccaaattcttcc
	M61d4_MsVHE	Musmus IGHV1S135*01 [F]	M	1	0	1	3	1	2	0	0	0	6	3	3	10	Musmus IGHJ2*01 F (see comment)	Musmus IGHD1-1*01 F	3	8.8.11	[7.17.38.11]	CARVSSYGYFDYW	in-frame	+	tgaagatatcctgcaaggcttctggttactcattcactggctacaacatgtactgggtgaagcagagccataggaaaagccttgagtggattggatatattgatccttacaatggtggtactagctacaaccagaagtccaagggcaaggccacattgactgtagacaaatcttccagcacagcctacatgcatctcaacagcctgacatctgaggactctgcaatctattactgtgcaagagttagtagctacgggtactttgactactggggccaaggcaccactctcacagtctcctcagagagtcagtccttcccaaattcttccc
	M61f1_MsVHE	Musmus IGHV14-3*02 F	M	0	0	0	0	0	0	0	0	0	0	0	0	0	Musmus IGHJ3*01 F	Musmus IGHD2-1*01 F	3	8.8.8	[8.17.38.11]	CAYGNHFAYW	in-frame	+	cacaagttgtcctgcacagcttctggcttcaacattaaagacacctatatgcactgggtgaagcagaggcctgaacagggcctggagtggattggaaggattgatcctgcgaatggtaatactaaatatgacccgaagttccagggcaaggccactataacagcagacacatcctccaacacagcctacctgcagctcagcagcctgacatctgaggacactgccgtctattactgtgcctatggtaaccattttgcttactggggccaagggactctggtcactgtctctgcagagagtcagtccttcccaaattccctt
	M61f3x_MsVHE	Musmus IGHV1-14*01 F	M	1	0	1	0	0	0	1	0	1	0	0	0	2	Musmus IGHJ4*01 F	Musmus IGHD3-2*01 F	2	6.8.11	[X.17.38.11]	CARDSSGFRMDYW	in-frame	+	cacattcactaactatgttatgcactgggtgaagcagaagcctgggcagggccttgagtggattggatatattaatccttacaatgatggtactaagtacaatgagaagttcaaaggcaaggccacactgacttcagacaaatcctccagcacagcctacatggagctcagcagcctgacctctgaggactctgcggtctattactgtgcaagagacagctcgggcttccgtatggactactggggtcaaggaacctcagtcaccgtctcctcagagagtcagtccttcccaaatgtcttccccc
	M61f5_MsVHE	Musmus IGHV2-9*02 F	M	0	0	0	0	0	0	0	0	0	0	0	0	0	Musmus IGHJ2*01 F			8.7.5	[7.17.38.11]	CARVDYW	in-frame	+	agtccatcacttgcactgtctctgggttttcattaaccagctatggtgtacactgggttcgccagcctccaggaaagggtctggagtggctgggagtaatatgggctggtggaagcacaaattataattcggctctcatgtccagactgagcatcagcaaagacaactccaagagccaagttttcttaaaaatgaacagtctgcaaactgatgacacagccatgtactactgtgccagagttgactactggggccaaggcaccactctcacagtctcctcagagagtcagtccttcccaaattcttcc
	M61g2_MsVHE	Musmus IGHV2-6-7*01 F, or Musmus IGHV2-6-7*02 F	M	0	0	0	0	0	0	1	0	1	0	0	0	1	Musmus IGHJ3*01 F			8.7.7	[7.17.38.11]	CARGGFAYW	in-frame	+	gtccatcacatgcaccgtctcagggttctcattaaccggctatggtgtaaactgggttcgccagcctccaggaaagggtctggagtggctgggaatgatatggggtgatgaaagcacagactataattcagctctcaaatccagactgagcatcagcaaggacaactccaagagccaagttttcttaaaaatgaacagtctgcaaactgatgacacagccaggtactactgtgccagaggagggtttgcttactggggccaagggactctggtcactgtctctgcagagagtcagtccttcccaaataacctt
	M61g6_MsVHE	Musmus IGHV3-1*02 F	G2B	0	0	0	0	0	0	0	0	0	0	0	0	0	Musmus IGHJ3*01 F	Musmus IGHD4-1*01 F	3	8.7.7	[X.17.38.11]	CASNWEDYW	in-frame	+	ctactccatcaccagtggttatagctggcactggatccggcagtttccaggaaacaaactggaatggatgggctacatacactacagtggtagcactaactacaacccatctctcaaaagtcgaatctctatcactcgagacacatccaagaaccagttcttcctgcagttgaattctgtgactactgaggacacagccacatattactgtgcctctaactgggaggattactggggccaagggactctggtcactgtctctgcagccaaaacaacacccccatcagtctatccactggcccctgggtgtggagatacaactggttcctccgtgactctgggatgcctggtcaagggcattt
	M62a2_MsVHE	Musmus IGHV14-4*02 F	G2B	0	0	0	0	0	0	2	1	1	2	0	2	4	Musmus IGHJ2*01 F	Musmus IGHD2-4*01 F	1	8.8.12	[X.17.38.11]	CNAGTMITYYFDYW	in-frame	+	ggcttcaacattaaagactactatatgcactgggtgaagcagaggcctgaacagggcctggagtggattggatggattgatcctgaacatggtgatactgaatatgccccgaagttccagggcaaggccactatgactgcagacacatcctccaacacagcctacctgcatctcagcagcctgacatctgaggaccctgccgtctattactgtaatgcggggactatgattacgtactactttgactactggggccaaggcaccactctcacagtctcctcagccaaaacaacacccccatcagtctatccactggcccctgggtgtggagatacaactggttcctccgtgactctgggatgcctggtcaagggctctt
	M62a3_MsVHE	Musmus IGHV2-9*02 F	G2A	1	0	1	0	0	0	2	0	2	0	0	0	3	Musmus IGHJ2*01 F (see comment)	Musmus IGHD1-1*01 F	3	8.7.16	[X.17.38.11]	CARDSMDDNYGRTYFDYW	in-frame	+	gggatttcattaaccagctatggtgtacactgggttcgccagcctccaggaaagggtctggagtggctgggagtaatgtgggctggtggaaacacaaattataattcggctctcatgtccagactgagcatcagcaaagacaactccaagagccaagttttcttaaaaatgaacagtctgcaaactgatgacacagccatgtactactgtgccagagatagcatggatgataactacggcaggacttactttgactactggggccaaggcaccactctcacagtctcctcagccaaaacaacagccccatcggtctatccactggcccctgtgtgtggagatacaactggctcctcggtgactctaggatgcctggtcaagggctttcc
	M62b1_MsVHE	Musmus IGHV2-3*01 F	M	1	1	0	0	0	0	0	0	0	0	0	0	1	Musmus IGHJ4*01 F	Musmus IGHD2-4*01 F	3	8.7.14	[7.17.38.11]	CAKPYDYEEGYAMDYW	in-frame	+	agtccatcacatgcactgtctcagggttctcattaacgagctatggtgtaagctgggttcgccagcctccaggaaagggtctggagtggctgggagtaatatggggtgacgggagcacaaattatcattcagctctcatatccagactgagcatcagcaaggataactccaagagccaagttttcttaaaactgaacagtctgcaaactgatgacacagccacgtactactgtgccaaaccatatgattacgaagaggggtatgctatggactactggggtcaaggaacctcagtcaccgtctcctcagagagtcagtccttcccaaattccct
	M62b2_MsVHE	Musmus IGHV2-9*02 F	G2B	2	1	1	0	0	0	1	1	0	0	0	0	3	Musmus IGHJ2*01 F	Musmus IGHD1-1*01 F	3	8.7.12	[X.17.38.11]	CARDQELDSFFDYW	in-frame	+	ggttattcattaaccagctatggtgtacactgggttcgccagcctccaggaaagggtctggagtggctgggagtaatctgggctggtggaagcacaaattataattcggctctcatgtccagactgagcatcagcaaagacaactccaagagccaagttttcttaaaaatgaacagtctgcaaactgatgacacagccatgtactactgtgccagagatcaagaacttgattccttttttgactactggggccaaggcaccactctcacagtctcctcagccaaaacaacacccccatcagtctatccactggcccctgggtgtggagatacaactggttcctccgtgactctgggatgcctggtcaagggctctt
	M62b3_MsVHE	Musmus IGHV2-3*01 F	M	0	0	0	1	0	1	1	0	1	0	0	0	2	Musmus IGHJ4*01 F	Musmus IGHD2-12*01 F	3	8.7.13	[7.17.38.11]	CAKRSNYDDYAMDYW	in-frame	+	gtccatcacatgcactgtctcagggttctcattaaccagctatggtgtaaactgggttcgccagcctccaggaaagggtctggagtggctgggagtaatatggggtgacgggaacacaaattatcattcagctctcatatccagactgagcatcagcaaggataactccaagagccaagttttcttaaaactgaacagtctgcaaactgatgacacagccacgtactactgtgccaaaagaagtaattacgacgattatgctatggactactggggtcaaggaacctcagtcaccgtctcctcagagagtcagtccttcccaaattcgttc
	M62b4_MsVHE	Musmus IGHV10-1*02 F	M	1	1	0	0	0	0	0	0	0	0	0	0	1	Musmus IGHJ4*01 F	Musmus IGHD2-1*01 F	2	8.10.12	[8.17.38.11]	CVRLLWYYYAMDYW	in-frame	+	cattagaactctcatgtgcagcctctggcttcaccttcaatacctacgccatgaactgggtccgccaggctccaggaaagggtttggaatgggttgctcgcataagaagtaaaagtaataattatgcaacatattatgccgattcagtgaaagacaggttcaccatctccagagatgattcacaaagcatgctctatctgcaaatgaacaacttgaaaactgaggacacagccatgtattactgtgtgagactactatggtactactatgctatggactactggggtcaaggaacctcagtcaccgtctcctcagagagtcagtccttcccaaattctta
	M62b5_MsVHE	Musmus IGHV3-8*02 F	M	0	0	0	1	1	0	1	0	1	0	0	0	2	Musmus IGHJ4*01 F	Musmus IGHD2-2*01 F	2	8.7.14	[7.17.38.11]	CARWGLRGYYYAMDYW	in-frame	+	accctcacctgttctgtcactggcgactccatcaccagtggttactggaactggatccggaaattcccagggaataaacttgagtacatgggttacataaactacagtggtagcacttactacaatccatctctcaaaagtcgaatctccatcactcgagacacatccaagaaccagtactacctgcagttgaattctgtgactactgaggacacagccacatattactgtgcaagatgggggttacgaggatattactatgctatggactactggggtcaaggaacctcagtcaccgtctcctcagagagtcagtccttcccaaatgccttc
	M62c4_MsVHE	Musmus IGHV1S30*01 P, or Musmus IGHV1S30*02 F	M	0	0	0	5	1	4	3	0	3	12	2	10	20	Musmus IGHJ4*01 F	Musmus IGHD1-1*01 F	3	8.8.13	[8.17.38.11]	CAREDDGNYYAMDYW	in-frame	+	gtgaagatatcctgcaaggcttctggttactcattcactggctactacatgcactgggtgaagcaaagccatgtaaagagccttgagtggattggacgtattaatccttacaatgatactactaactacaaccagaatttcaaggacaaggccagcttgactgtagataagtcctccagcacagcctacatggagctccacagcctgacatctgaggactctgcagtctattactgtgcaagagaggacgacgggaattactatgctatggactactggggtcaaggaacctcagtcaccgtctcctcagagagtcagtccttcccaaattcttcc
	M62d3_MsVHE	Musmus IGHV1-54*01 F, or Musmus IGHV1-54*03 [F]	M	0	0	0	0	0	0	0	0	0	2	0	2	2	Musmus IGHJ1*01 F	Musmus IGHD1-1*01 F	1	8.8.13	[8.17.38.11]	CARTTVVADWYFDVW	in-frame	+	gcacaggtgtcctgcaaggcttctggatacgccttcactaattacttgatagagtgggtaaagcagaggcctggacagggccttgagtggattggagtgattaatcctggaagtggtggtactaactacaatgacaagttcaagggcaaggcaacactgactgcagacaaatcctccagcactgcctacatgcagctcagcagcctgacatctgatgactctgcggtctatttctgtgcgaggactacggtagtagctgactggtacttcgatgtctggggcgcagggaccacggtcaccgtctcctcagagagtcagtccttcccaaattcttcc
	M62d4_MsVHE	Musmus IGHV3-8*02 F	M	0	0	0	0	0	0	1	0	1	2	1	1	3	Musmus IGHJ2*01 F	Musmus IGHD5-1*01 P	1	8.7.6	[7.17.38.11]	CTREDGYW	in-frame	+	tatccctcacctgttctgtcactggcgactccatcaccagtggttactggaactggatccggaaattcccagggaataaacttgagtacatggggtacataaactacagtggtagcacttactacaatccatctctcaaaagtcgaatctccatcactcgagacacatccaagaaccagttctacctgcagttgaattctgtgactactgaggacacagccacgtattactgtacaagggaggacggctactggggccacggcaccactctcacagtctcctcagagagtcagtccttcccaaattcttcc
	M62d5_MsVHE	Musmus IGHV1-4*01 F	M	2	0	2	0	0	0	1	0	1	1	0	1	4	Musmus IGHJ3*01 F	Musmus IGHD2-1*01 F	3	8.8.12	[7.17.38.11]	CARGGGYGNYLAYW	in-frame	+	gctgatgtcctgcaaggcttctggctacacctttactagctactggatgcactgggtaaaacagaggcctggacagggtctggaatggattggatacattaatcctagcactggttatactgagtacaatcagaagttcaaggacaaggccacattgactgcagacaaatcctccagcacagcctacatgcaactgagcagcctgacatctgaggactctgcagtctattactgtgcaagaggggggggttatggtaactaccttgcttactggggccaagggactctggtcactgtctctgcagagagtcagtccttcccaaattcttcc
	M62e3_MsVHE	Musmus IGHV14-1*02 F	M	0	0	0	0	0	0	0	0	0	1	0	1	1	Musmus IGHJ2*01 F (see comment)	Musmus IGHD6-3*01 F	1	8.8.10	[8.17.38.11]	CSLCSTGPFDYW	in-frame	+	tagtcaagttgtcctgcaaagcttctggcttcaacattaaagactactatatgcactgggtgaagcagaggcctgaacagggcctggagtggattggatggattgatcctgagaatggtaatactatatatgacccgaagttccagggcaaggccagtataacagcagacacatcctccaacacagcctacctgcagctcagcagcctggcatctgaggacactgccgtctattactgttctctctgctctacggggccttttgactactggggccaaggcaccactctcacagtctcctcagagagtcagtccttcccaaattccttc
	M62e6_MsVHE	Musmus IGHV5-17*02 F	G1	2	0	2	0	0	0	0	0	0	0	0	0	2	Musmus IGHJ2*01 F (see comment)	Musmus IGHD1-1*01 F	1	8.8.13	[X.17.38.11]	CASSYSTPVVHFDCW	in-frame	+	gatttcactttcagtagctttggaatgcactgggttcgtcaggctccagagaaggggctggagtgggtcgcatacattagtagtggcagtagtaccatctactatgcagacacagtgaagggccgattcaccatctccagagacaatcccaagaacaccctgttcctgcaaatgaccagtctaaggtctgaggacacggccatgtattactgtgcaagttcttatagtactccggtagtacactttgactgctggggccaaggcaccactctcacagtctcctcagccaaaacgacacccccatctgtctatccactggcccctggatctgctgcccaaactaactccatggtgaccctgggatgcctggtcaagggtcttt
	M62f1_MsVHE	Musmus IGHV14-4*02 F	M	0	0	0	0	0	0	0	0	0	1	0	1	1	Musmus IGHJ4*01 F	Musmus IGHD1-1*01 F	2	8.8.9	[8.17.38.11]	CNVLLYAMDYW	in-frame	+	cagcacagttgtcctgcacagcttctggcttcaacattaaagactactatatgcactgggtgaagcagaggcctgaacagggcctggagtggattggatggattgatcctgagaatggtgatactgaatatgtcccgaagttccagggcaaggccactatgactgcagacacatcctccaacacagcctacctgcagctcagcagcctgacatctgaggacactgccgtctattactgtaatgtactcctctatgctatggactactggggtcaaggaacctcagtcaccgtctcctcagagagtcagtccttcccaaattccttcc
	M62f2_MsVHE	Musmus IGHV1-4*01 F	M	2	0	2	1	0	1	1	0	1	5	1	4	9	Musmus IGHJ2*01 F	Musmus IGHD2-2*01 F	3	8.8.9	[7.17.38.11]	CGRGGYGYDYW	in-frame	+	gctgatgtcctgcaaggcttctggctacacctttactagctactggatgaactgggtaaaacagaggcctggacagggtctggaatggattggatacattaatcctagcactggttatactgagtacaatcagaagttcaaggacaaggccacattgactgcagacaaatcctccagtacagcctacatgcaactgaccagcctgacatctgaggactctgaagtctatttctgtggaagagggggctatggttacgactactggggccaaggcaccactctcacagtctcctcagagagtcagtccttcccaaattcctcc
	M62g5_MsVHE	Musmus IGHV14-3*02 F	M	0	0	0	1	0	1	0	0	0	2	0	2	3	Musmus IGHJ3*01 F	Musmus IGHD1-1*01 F	2	8.8.7	[8.17.38.11]	CARRYFAYW	in-frame	+	gcacaagttgtcctgcacagcttctggcttcaacattaaagacacctatatacactgggtgaagcagaggcctgaacagggcctggagtggattggaaggattgatcctgcgaatggtaatactaaatatgacccgaagttccagggcaaggccactataacagcagacacatcctccaacacagcctacctgcagctctgcagcctgacatctgaggacactgccgactattactgtgctaggcggtactttgcttactggggccaagggactctggccactgtctctgcagagagtcagtccttcccaaatgtcttcccac
	M62h1_MsVHE	Musmus IGHV14-3*02 F	G2B	2	0	2	1	0	1	1	0	1	1	1	0	5	Musmus IGHJ4*01 F	Musmus IGHD3-2*01 F	3	7.8.11	[X.17.38.11]	CARSGTSLGMDYW	in-frame	+	gcaacaacattaaagacacctatatgcactgggtgaagcagaggcctgaacagggcctggagtgaattggaaggattgatcctgcgaatggtaatgctaaatatgacccgaagttccagggcaaggccactataacagcagacacatcctccaatacagcctacctgcagctcagcagcctgacatctgaggacactgccgtctattactgtgctaggagtgggacttccctgggaatggactactggggtcaaggaacctcagtcaccgtctcctcagccaaaacaacacccccatcagtctatccactggcccctgggtgtggagatacaactggttcctccgtgactctgggatgcctggtcaagggctctttc
	M62h3_MsVHE	Musmus IGHV1-9*01 F	M	2	0	2	0	0	0	0	0	0	2	0	2	4	Musmus IGHJ2*01 F (see comment)	Musmus IGHD2-1*01 F	3	8.8.8	[7.17.38.11]	CARLGNYGYW	in-frame	+	agaagatatcctgcaaggcttctggctacacattcagtagctactggatagagtgggtaaagcagaggcctggacatggccttgagtggattggagagattttacctggaagtggtagtactaactacaatgagaagttcaagggcaaggccacattcactgcagatacatcctccaacacagcctacatgcaactcagcagcctgacatctgaggactctgccgtctattactgtgcaaggttgggtaactacggctactggggccaaggcaccactctcacagtctcctcagagagtcagtccttcccaaattcttcc
	M63a1_MsVHE	Musmus IGHV1-47*01 F	M	1	1	0	1	1	0	0	0	0	2	1	1	4	Musmus IGHJ4*01 F	Musmus IGHD2-1*01 F	3	8.8.10	[8.17.38.11]	CARGNYGAMDYW	in-frame	+	ctgaagatgtcctgcaaggcttttggctacaccttcactacctatccaatagagtggatgaagcagaatcatgggaagagcctagagtggattggaaattttcatccttacaatgatgatactaagtacaatgaaaaattcaagggcaaggccaaattgactgtagaaaaatcctctagcacagtctacttggagctcagccgattaacatctgatgactctgctgtttattactgtgcaaggggtaactacggggctatggactactggggtcaaggaacctcagtcaccgtctcctcagagagtcagtccttcccaaattcgtcc
	M63a6_MsVHE	Musmus IGHV1-26*01 F	M	6	1	5	3	0	3	1	0	1	4	3	1	14	Musmus IGHJ2*01 F (see comment)	Musmus IGHD4-1*01 F	3	8.8.8	[7.17.38.11]	CARNWDVDYW	in-frame	+	gaagatatcctgcaaggcttctggttactcattcactggctacaccatgaactgggtgaagcagagccatggaaagaaccttgagtggattggacttattaatccttacaatggtggtactagctacaaccagaagttcaagggcaaggccacattaactgtagacaagtcatccagcacagcctacatggagctcctcagtctgacatctgaggactctgcagtctattactgtgcaagaaactgggacgttgactactggggccaaggcaccactctcacagtctcctcagagagtcagtccttcccaaatgcctttccacc
	M63b2_MsVHE	Musmus IGHV3-8*02 F	G3	4	0	4	1	0	1	0	0	0	0	0	0	5	Musmus IGHJ3*01 F	Musmus IGHD2-14*01 F	3	7.7.9	[X.17.38.11]	CARGYPWFAYW	in-frame	+	cgaactcctcaccagtggttactggaactggatccggaaattcccagggaataaacttgactacatggggtacataagctacagtggtagcacttactacaatccatctctcaaaagtcgaatctccatcactcgagacacatccaagaaccagtactacctgcagttgaattctgtgactactgaggacacagccacatattactgtgcaagagggtacccctggtttgcttactggggccaagggactctggtcactgtctctgcagctacaacaacagccccatctgtctatcccttggtccctggctgcagtgacacatctggatcctcggtgacactgggatgccttgtcaaaggcttttcc
	M63b5_MsVHE	Musmus IGHV5-4*02 F	M	0	0	0	1	0	1	1	0	1	1	0	1	3	Musmus IGHJ3*01 F			8.8.7	[8.17.38.11]	CARGGFAYW	in-frame	+	cccagaaactctcctgtgcagcctctggattcactttcagtgactattacatgtattgggttcgccagactccggaaaagaggctggagtgcgtcgcaaccattagtgatggtggtacttacacctactatccagacagtgtgaaggggcgattcaccatctccagagacattgccaagaacaacctgtacctgcaaatgagcagtctgaagtctgaggacacagccatgtattactgtgcaagaggggggtttgcttactggggccaagggactctggtcactgtctctgcagagagtcagtccttcccaaattccttc
	M63b6_MsVHE	Musmus IGHV1S34*01 F	M	1	0	1	0	0	0	0	0	0	1	0	1	2	Musmus IGHJ4*01 F			8.8.12	[7.17.38.11]	CARSGYYLYAMDYW (see V-DOMAIN Functionality comment)	in-frame	+	gccgatatcctgcaaggcttctggttactcattcactggttcctacatgcactgggtcaagcagagccatggaaagagccttgagtggattggatatattagttgttacaatggtgctactacctacaaccagaagttcaagggcaaggccacatttactgtagacacatcctccagcacagcctacatgcagttcaacagcctgacatctgaagactctgcggtctattactgtgcaagaagtggttactacctctatgctatggactactggggtcaaggaacctcagtcaccgtctcctcagagagtcagtccttcccaaattcttcc
	M63c3_MsVHE	Musmus IGHV1S34*01 F	M	0	0	0	0	0	0	0	0	0	2	0	2	2	Musmus IGHJ2*01 F (see comment)			8.8.12	[7.17.38.11]	CARRDYDYADFDYW (see V-DOMAIN Functionality comment)	in-frame	+	agccgatatcctgcaaggcttctggttactcattcactggttactacatgcactgggtcaagcagagccatggaaagagccttgagtggattggatatattagttgttacaatggtgctactaactacaaccagaagttcaagggcaaggccacatttactgtagacacatcctccaacacagcctacatgcagttcaacagcctgacatctgaagactctgcggtctattactgtgcaagacgggactatgattacgcggactttgactactggggccaaggcaccactctcacagtctcctcagagagtcagtccttcccaaattcgtcc
	M63d1_MsVHE	Musmus IGHV1-26*01 F	M	2	1	1	1	0	1	1	0	1	6	1	5	10	Musmus IGHJ2*01 F	Musmus IGHD2-2*01 F	2	8.8.9	[0.17.38.11]	CSRGLPLFDYW	in-frame	+	tggtatacaccttcactgactactacatgaagtgggtgaagcagagccatggaaagagccttgagtggattggagatattaatcctaacaatggtgatactttctacaaccagaagttcaagggcaaggccacattgactgtagacaaatcctccagcacagcctacatgcagctcaacagcctgacatctgaggactctgcagtctattactgttcaagggggttacccctctttgactactggggccaaggcaccactctcacagtctcctcagagagtcagtccttcccaaattcttccc
	M63d2_MsVHE	Musmus IGHV14-4*02 F	M	0	0	0	0	0	0	1	0	1	1	0	1	2	Musmus IGHJ2*01 F (see comment)	Musmus IGHD2-1*01 F	3	X.8.9	[X.12.38.11]	CSALYGNYYYW	in-frame	+	cagaggcctgaacagggcctggagtggattggatggattgatcctgataatggtgatactgaatatgccccgaagttccagggcaaggccactatgactgcagacacatcctccaacacagcctacctgcagctcatcagcctgacatctgaggacactgccgtctattactgtagtgccctctatggtaactactactactggggccaaggcaccactctcacagtctcctcatagaatcag
	M63d5_MsVHE	Musmus IGHV14-4*02 F	G2B	1	0	1	0	0	0	0	0	0	1	0	1	2	Musmus IGHJ4*01 F	Musmus IGHD2-4*01 F	3	7.8.11	[X.17.38.11]	CNAHYDYPSVDYW	in-frame	+	gctacaacattaaagactactatatgcactgggtgaagcagaggcctgaacagggcctggagtggattggatggattgatcctgagaatggtgatactgaatttgccccgaagttccagggcaaggccactatgactgcagacacatcctccaacacagcctacctgcagctcagcagcctgacatctgaggacactgccgtctattactgtaatgcacactatgattatccgtctgtggactactggggtcaaggagcctcagtcaccgtctcctcagccaaaacaacacccccatcagtctatccactggcccctgggtgtggagatacaactggttcctccgtgactctgggatgcctggtcaagggctt
	M63d6_MsVHE	Musmus IGHV1S135*01 [F]	M	1	0	1	4	1	3	1	0	1	6	2	4	12	Musmus IGHJ4*01 F	Musmus IGHD1-1*02 F	3	8.8.6	[7.17.38.11]	CARGGDYW	in-frame	+	agccgatatcctgcaaggcttctggttactcattcactggctacaacatgaactgggtgaaacagagcaatggaaagagccttgagtggattggaaatattgatccttactatggtggtactaactacaaccagaagttcaagggcaaggccacattgactgtagacaaatcctccagcacagcctacatgcagctcaagagcctgacatctgaggactctgcagtctattactgtgcaagaggaggggactattggggtcaaggaacctcagtcaccgtctcctcagagagtcagtccttcccaaattcttcc
	M63e2_MsVHE	Musmus IGHV14-1*02 F	M	0	0	0	1	0	1	0	0	0	2	0	2	3	Musmus IGHJ4*01 F			8.8.9	[9.17.38.11]	CARGSSAMDYW	in-frame	+	ttagtcaagttgtcctgcaaagcttctggcttcaacattaaagactactatatgtactgggtgaagcagaggcctgaacagggcctggagtggattggatggattgatcctgagaatggtaatactatatatgacacgaagttccagggcaaggccagtataacagcagacacatcctccaacacagtctacctgcagctcagcagcctgacatctgaggacactgccgtctattactgtgctagagggtcctctgctatggactactggggtcaaggagcctcagtcaccgtctcctcagagagtcagtccttcccaaattccttc
	M63e3_MsVHE	Musmus IGHV3-1*02 F	G1	0	0	0	0	0	0	0	0	0	0	0	0	0	Musmus IGHJ4*01 F	Musmus IGHD1-1*02 F	2	8.7.12	[X.17.38.11]	CARRWEYYYAMDYW	in-frame	+	ctactccatcaccagtggttatagctggcactggatccggcagtttccaggaaacaaactggaatggatgggctacatacactacagtggtagcactaactacaacccatctctcaaaagtcgaatctctatcactcgagacacatccaagaaccagttcttcctgcagttgaattctgtgactactgaggacacagccacatattactgtgcaagaaggtgggaatattactatgctatggactactggggtcaaggaacctcagtcaccgtctcctcagccaaaacgacacccccatctgtctatccactggcccctggatctgctgcccaaactaactccatggtgaccctgggatgcctggtcaagggctattcc
	M63e4_MsVHE	Musmus IGHV5-4*02 F	G1	3	0	3	0	0	0	0	0	0	0	0	0	3	Musmus IGHJ4*01 F	Musmus IGHD1-1*01 F	3	8.8.15	[0.17.38.11]	CARVEDYYVSSYAMDYW	in-frame	+	ctggaaacactttcaatgactattacatgtattgggttcgccagactccggaaaagaggctggagtgggtcgcaaccattagtgatggtggtagttacacctactatccagacagtgtgaaggggcgattcaccatctccagagacaatgccaagaacaacctgtacctgcaaatgagcagtctgaagtctgaggacacagccatgtattactgtgcaagagtagaggattactacgttagtagctacgctatggactactggggtcaaggaacctcagtcaccgtctcctcagccaaaacgacacccccatctgtctatccactggcccctggatctgctgcccaaactaactccatggtgaccctgggatgcctggtcaagggctcttt
	M63e6_MsVHE	Musmus IGHV1-9*01 F	M	2	0	2	2	0	2	0	0	0	3	0	3	7	Musmus IGHJ2*01 F	Musmus IGHD2-2*01 F	3	8.8.9	[7.17.38.11]	CARGSYYFDYW	in-frame	+	agaagatatcctgcaaggctactggctacacattcagtagctactggatagagtgggtaaaccagaggcctggacatggccctgagtggattggagagattttacctggaagtggtagtactaagtacaatgagaagttcaagggcaaggccacattcactgcagatacatcctccaacacagcctacatgcaactcagcagcctgacatctgaggactctgccgtctattactgtgcaagaggttcttactactttgactactggggccaaggcaccactctcacagtctcctcagagagtcagtccttcccaaattcttcc
	M63f3_MsVHE	Musmus IGHV14-3*02 F	M	0	0	0	1	0	1	0	0	0	0	0	0	1	Musmus IGHJ3*01 F	Musmus IGHD1-3*01 F	1	8.8.10	[8.17.38.11]	CAGGGLAWFAYW	in-frame	+	cacaagttgtcctgcacagcttctggcttcaacattaaagacacctatatacactgggtgaagcagaggcctgaacagggcctggagtggattggaaggattgatcctgcgaatggtaatactaaatatgacccgaagttccagggcaaggccactataacagcagacacatcctccaacacagcctacctgcagctcagcagcctgacatctgaggacactgccgtctattactgtgcagggggtggtctcgcctggtttgcttactggggccaagggactctggtcactgtctctgcagagagtcagtccttcccaaatttgttc
	M63g3_MsVHE	Musmus IGHV14-3*02 F	G1	0	0	0	1	0	1	0	0	0	1	0	1	2	Musmus IGHJ3*01 F	Musmus IGHD2-4*01 F	3	7.8.10	[X.17.38.11]	CAYDYDGGLAYW	in-frame	+	gcttcaacattaaagacacctatatgcactgggtgaagcagaggcctgaacagggcctggagaggattggaaggattgatcctgcgaatggtaatactaaatatgacccgaagttccaggacaaggccactataacagcagacacatcctccaacacagcctacctgcagctcagcagcctgacatctgaggacactgccgtctattactgtgcttatgattacgacggggggcttgcttactggggccaagggactctggtcactgtctctgcagccaaaacgacacccccatctgtctatccactggcccctggatctgctgcccaaactaactccatggtgaccctgggatgcctggtcaagggtattcc
	M63g5_MsVHE	Musmus IGHV5-4*02 F	M	0	0	0	0	0	0	0	0	0	0	0	0	0	Musmus IGHJ2*01 F (see comment)	Musmus IGHD1-1*01 F	3	8.8.14	[8.17.38.11]	CARDPNYYGSSYLDYW	in-frame	+	ccctgaactctcctgtgcagcctctggattcactttcagtgactattacatgtattgggttcgccagactccggaaaagaggctggagtgggtcgcaaccattagtgatggtggtagttacacctactatccagacagtgtgaaggggcgattcaccatctccagagacaatgccaagaacaacctgtacctgcaaatgagcagtctgaagtctgaggacacagccatgtattactgtgcaagagatccgaattactacggtagtagttacctcgactactggggccaaggcaccactctcacagtctcctcagagagtcagtccttcccaaattccctt
	M63g6_MsVHE	Musmus IGHV3-2*02 F	G1	2	0	2	0	0	0	0	0	0	1	0	1	3	Musmus IGHJ2*01 F	Musmus IGHD2-1*01 F	3	8.7.17	[X.17.38.11]	CARSPIYYGNYVTYYFDYW	in-frame	+	cttatcaatcaccagtgattatgcctggaactggatccggcagtttccaggaaacaaactggagtggatgggctacataagctacagtggtagcactagctacaacccatctctcaaaagtcgaatctctatcactcgagacacatccaagaaccagttcttcctgcagatgaattctgtgactactgaggacacagccacatattactgtgcaagatccccgatctactatggtaactacgtcacgtactactttgactactggggccaaggcaccactctcacagtctcctcagccaaaacgacacccccatctgtctatccactggcccctggatctgctgcccaaactaactccatggtgaccctgggatgcctggtcaagggctttcc
	M63h1_MsVHE	Musmus IGHV1-9*01 F	G2B	2	0	2	0	0	0	0	0	0	3	0	3	5	Musmus IGHJ4*01 F	Musmus IGHD2-14*01 F	3	7.8.17	[X.17.38.11]	CARGTYYRYDRNYYAMDYW	in-frame	+	tacacattcagtagctactggatagagtgggtaaagcagaggcctggacatggccttgagtggattggagagattttacctggaagtggtagtactaactacaatgagaagttcaagggcaaggccacattcactgcagatacatcctccaacacagcctacatgcaactcagcagcctgacatctgaggactctgccgtctattcctgtgcaagagggacctactataggtacgacaggaattactatgctatggactactggggtcaaggaacctcagtcaccgtctcctcagccaaaacaacacccccatcagtctatccactggcccctgggtgtggagatacaactggttcctccgtgactctgggatgcctggtcaagggtctt
	M63h2_MsVHE	Musmus IGHV1S137*01 [F]	M	0	0	0	1	1	0	3	0	3	5	2	3	9	Musmus IGHJ2*01 F			8.8.7	[8.17.38.11]	CARTYLDYW (see V-DOMAIN Functionality comment)	in-frame	+	tcagtgagatttcctgcaagggttccggctacacattcactgattatgctatgcactgggtgaagcagagtcatgcaaagagtcttgagtggattggagttattagtacttactatggtaatacaaactacaaccagaagtttaagggcaaggccacaatgactgtagacaaatcctccagcacagcctatatggaacttgccagattgacatctgaggattctgccatctattactgtgcaagaacctaccttgactactggggccaaggcaccactctcacagtctcctcagagagtcagtccttcccaaattccttcc
	M63h3_MsVHE	Musmus IGHV1-80*01 F	M	1	1	0	1	0	1	0	0	0	5	5	0	7	Musmus IGHJ3*01 F	Musmus IGHD1-1*01 F	3	8.8.12	[8.17.38.11]	CARGDYGSSSFAYW	in-frame	+	agtgaagatttcctgcaaggcttctggctatgcattcagtagctactggatgaactgggtgaagcagaggcctggacagggtcttgagtggattggacagatttatcctggagatggtgatactaactacaatggaaagttcaagggtaaagccacactgactgcagacaaatcctccagcacagcctacatgcagctcagcagcctaacatctgaggactctgcggtctatttctgtgcaagaggggactacggtagtagttcgtttgcttactggggccaagggactctggtcactgtctctgcagagagtcagtccttcccaaatgccttt
E4 prime day 17	Sequence ID	V-GENE and allele	Isotype	CDR1T	CDR1S	CDR1R	FR2T	FR2S	FR2R	CDR2T	CDR2S	CDR2R	FR3T	FR3S	FR3R	Tot Mut	J-GENE and allele	D-GENE and allele	D-REGION reading frame	CDR-IMGT lengths	FR-IMGT lengths	AA JUNCTION	JUNCTION frame	Orientation	Sequence
	M81a4_MsVHE	Musmus IGHV1-87*01 F	M	1	1	0	0	0	0	0	0	0	4	0	4	5	Musmus IGHJ2*01 F	Musmus IGHD2-4*01 F	3	8.8.10	[8.17.38.11]	CARDDYDYFDYW	in-frame	+	agcaagttgtcctgcaaggcttctggctacacctttactagctactggatgcagtgggtaaaacagaggcctggacagggtctggaatggattggggctatttatcctggagatggtgatactaggtacactcagaagttcaagggcaaggccacaatgactgcagataaatcctccagcacagcctacatgcaactcaacagcttggcatctgaggactctgcggtctattactgtgcaagagatgattacgactactttgactactggggccaaggcaccactctcacagtctcctcagagagtcagtccttcccaaattctt
	M81b2_MsVHE	Musmus IGHV10-1*02 F	M	0	0	0	1	0	1	1	0	1	0	0	0	2	Musmus IGHJ1*01 F	Musmus IGHD1-1*01 F	3	8.10.9	[8.17.38.11]	CVSGDGYFDVW	in-frame	+	attagaactctcatgtgcagcctctggattcaccttcaatacctacgccatgaactgggtccgccaggctccaggaaagggttgggaatgggttgctcgcataagaagtaaaagtaatcattatgcaacatattatgccgattcagtgaaagacaggttcaccatctccagagatgattcacaaagcatgctctatctgcaaatgaacaacttgaaaactgaggacacagccatgtattactgtgtgagcggtgacgggtacttcgatgtctggggcgcagggaccacggtcaccgtctcctcagagagtcagtccttcccaaattctttcc
	M81c4_MsVHE	Musmus IGHV2-9*02 F	M	1	0	1	0	0	0	0	0	0	3	2	1	4	Musmus IGHJ3*01 F	Musmus IGHD2-10*02 F	3	8.7.12	[8.17.38.11]	CAREKYGNSVFAYW	in-frame	+	gtacacatcacttgcactgtctctgggttttcattaaccacctatggtgtacactgggttcgccagcctccaggaaagggtctggagtggctgggagtaatatgggctggtggaagcacaaattataattcggctctcatgtccagactgagcatcagtaaagacaattccaagagccaagttttcttaaaaatgaacagtctgcaaactgatgacacagccatttactactgtgccagagaaaagtatggtaactccgtctttgcttactggggccaagggactctggtcactgtctcagcagagagtcagtccttcccaaattcctt
	M81d5x_MsVHE	Musmus IGHV1-82*01 F	M	3	2	1	1	0	1	0	0	0	4	3	1	8	Musmus IGHJ4*01 F	Musmus IGHD2-2*01 F	3	8.8.15	[8.17.38.11]	CARSGDGYDEAYAMDYW	in-frame	+	gagcaagatttcctgcaaaccttctggcaacgcattcagtagttcttggatgaactgggtgaagcagaggcctggacagggtcttgagtggattggacggatttatcctggagatggagatactaactacaatgggaagttcaagggcaaggccacactgactgcagacaaatcctccagcacagcctacatgcagctcagcagcctgacctctgtggactctgcggtctatttctgtgcaagatcgggagatggttacgacgaggcttatgctatggactactggggtcaaggaacctcagtcaccgtctcctcagagagtcagtccttcccaaatgcccttccccc
	M81e1x_MsVHE	Musmus IGHV1-87*01 F	M	3	1	2	0	0	0	0	0	0	2	0	2	5	Musmus IGHJ4*01 F	Musmus IGHD1-1*01 F	1	8.8.10	[8.17.38.11]	CARETTVVMDYW	in-frame	+	gagtttgtcctgcaaggcttctgagcatacacctttactagctactggatgcagtgggtaaaacagaggcctggacagggtctggaatggattggggctatttatcctggagatggtgatactaggtacactcagaagttcaagggcaaggccacattgactgcagataaatcctccagcacagcctacatgcaactcagcagcttggcatctgaggactctgcggtctattactgtgcaagagagactacggtagttatggactactggggtcaaggaacctcagtcaccgtctcctcagagagtcagtccttcccaaattcttcc
	M81e3_MsVHE	Musmus IGHV3-2*02 F	G3	0	0	0	1	0	1	1	0	1	2	0	2	4	Musmus IGHJ3*01 F	Musmus IGHD6-3*01 F	1	9.7.13	[7.17.38.11]	CARSEVPLLAWFAYW	in-frame	+	tcactcacctgcactagtcactggctactcaatcaccagtgattatgcctggaactggatccggcagtttccaggaaacaaactggagtggatgggcttcataaactacagtggtagcactagctacaacccatctctcaaaagtcgaatctctatcactcgagacacatccaagaaccagttcttcctgcagttgacttctgtgactactgaggacacagccacatattcctgtgcaagatcggaggtgcccctacttgcctggtttgcttactggggccaagggactctggtcactgtctctgcagctacaacaacagccccatctgtctatcccttggtccctggctgcagtgacacatctggatcctcggtgacactgggatgccttgtcaaagg…
	M81e5_MsVHE	Musmus IGHV1-84*02 [F]	M	1	0	1	0	0	0	3	0	3	2	1	1	6	Musmus IGHJ2*01 F	Musmus IGHD2-14*01 F	3	8.8.10	[7.17.38.11]	CARGYRYYFDYW	in-frame	+	gcatgatatccttcaaggcttctggctacatcttcactgactactatataaactgggtgaagcagaagcctggacagggacttgagtggattggatggatttatcctggaagcgaagatactcagtataatgagaagttcaagggcaaggccacattgactgtagacacatcctccagcacagcctacatgcagctcagcagcctgacatctgaggacactgctgtctatttctgtgcaagaggctataggtactactttgactactggggccaaggcaccactctcacagtctcctcagagagtcagtccttcccaaattcttcc
	M81e6_MsVHE	Musmus IGHV1S53*01 F, or Musmus IGHV1S53*02 F	M	0	0	0	1	0	1	0	0	0	0	0	0	1	Musmus IGHJ2*01 F	Musmus IGHD4-1*02 F	2	8.8.11	[7.17.38.11]	CKRSFNWDVLDYW	in-frame	+	agaagatatcctgcaaggcttctggctacaccttcactgaccatgctattcactgggtgaaccagaagcctgaacagggcctggaatggattggatatatttctcccggaaatggtgatattaagtacaatgagaagttcaagggcaaggccacactgactgcagacaaatcctccagcactgcctacatgcagctcaacagcctgacatctgaggattctgcagtgtatttctgtaaaagatcattcaactgggacgtcctggactactggggccaaggcaccactctcacagtctcctcagagagtcagtccttcccaaattcattc
	M81f1_MsVHE	Musmus IGHV2-6-7*01 F, or Musmus IGHV2-6-7*02 F	M	1	0	1	0	0	0	1	0	1	0	0	0	2	Musmus IGHJ4*01 F	Musmus IGHD3-1*01 F	3	8.7.13	[7.17.38.11]	CAREGFGDYYAMDYW	in-frame	+	caaatcacatgcaccgtctcagggttctcattaaccggctttggtgtaaactgggttcgccagcctccaggaaagggtctggagtggctgggaatgatatggggtgatggaaacacagactataattcagctctcaaatccagactgagcatcagcaaggacaactccaagagccaagttttcttaaaaatgaacagtctgcaaactgatgacacagccaggtactactgtgccagagagggctttggcgattactatgctatggactactggggtcaaggaacctcagtcaccgtctcctcagagagtcagtccttcccaaattcgttc
	M81f3_MsVHE	Musmus IGHV1-37*01 F	M	0	0	0	1	0	1	0	0	0	1	0	1	2	Musmus IGHJ1*01 F	Musmus IGHD2-5*01 F	3	8.8.13	[7.17.38.11]	CGRSRNYGYWYFDVW	in-frame	+	agaagatatcctgcaaggcttctggttactcatttactggctactttatgaactgggtgaagcagagccatggaaagagccttgcgtggattggacgtattaatccttacaatggtgatactttctacaaccagaagttcaagggcaaggccacattgactgtagacaaatcctctagcacagcccacatggagctcctgagcctgacatctgaggactctgcagtctattattgtggaagatcgaggaactacggctactggtacttcgatgtctggggcgcagggaccacggtcaccgtctcctcagagagtcagtccttcccaaattcttcc
	M81f5_MsVHE	Musmus IGHV1-77*01 F, or Musmus IGHV1-81*01 F	M	5	3	2	4	1	3	3	0	3	4	2	2	16	Musmus IGHJ4*01 F	Musmus IGHD1-1*01 F	1	8.8.18	[8.17.38.11]	CARFQFITTVIAHYYAMDYW	in-frame	+	agcaagatgtcctgcaaggcttctggatacacattcactgactatgttataacctgggtgaagcagagaactggacagggccttgagtggattggagagatttatcctggaagtggtagtccttactacaatgaaaagttcaagggcagggccacactgactgcagacaaatcctccaacacagcctacatgcagctcagcagcctgacatctgaggactctgcggtctatttctgtgcaagattccaatttattactacggtgatagcccattactatgctatggactactggggtcaaggaacctcagtcaccgtctcctcagagagtcagtccttcccaaattccttt
	M81f6_MsVHE	Musmus IGHV1-77*01 F	M	0	0	0	3	0	3	3	0	3	0	0	0	6	Musmus IGHJ3*01 F	Musmus IGHD3-3*01 F	2	8.8.8	[8.17.38.11]	CAREGPLAYW	in-frame	+	gagcaagctgtcctgcaaggcttctggctacaccttcactgactactatataaactgggtgaagtagaggactggacagggccttgagtggattggagagatttatcctggaagtggtaatacttactacaatgagaagttcaagggcaaggccacactgactgcagacaaatcctccagcacagcctacatgcagctcagcagcctgacatctgaggactctgcagtctatttctgtgcaagagagggaccccttgcttactggggccaagggactctggtcactgtctctgcagagagtcagtccttcccaaattccttc
	M81g3_MsVHE	Musmus IGHV1-15*01 F	M	0	0	0	1	0	1	0	0	0	1	0	1	2	Musmus IGHJ2*01 F (see comment)	Musmus IGHD2-3*01 F	3	8.8.10	[8.17.38.11]	CTRLVDGYYNYW	in-frame	+	cagtgacgctgtcctgcaaggcttcgggctacacatttactgactatgaaatgcactgggtgaagcagacacctgtgcatggcctggaatggattggaactattgatcctgaaactggtggtactgcctacaatcagaagttcaagggcaaggccacactgactgcagacaaatcctccagcacagcctacatggagctccgcagcctgacatctgaggactctgccgtctattactgtacaagattggttgatggttactacaactactggggccaaggcaccactctcacagtctcctcagagagtcagtccttcccaaattcgtcc
	M81g6_MsVHE	Musmus IGHV3-8*02 F	M	0	0	0	0	0	0	1	0	1	0	0	0	1	Musmus IGHJ4*01 F	Musmus IGHD2-14*01 F	1	8.7.12	[8.17.38.11]	CARPLRTLYAMDYW	in-frame	+	ctgtccctcacctgttctgtcactggcgactccatcaccagtggttactggaactggatccggaaattcccagggaataaacttgagtacatggggtacataacctacagtggtagcacttactacaatccatctctcaaaagtcgaatctccatcactcgagacacatccaagaaccagtactacctgcagttgaattctgtgactactgaggacacagccacatattactgtgcaaggcctctacggactctctatgctatggactactggggtcaaggaacctcagtcaccgtctcctcagagagtcagtccttcccaaataacct
	M81h3_MsVHE	Musmus IGHV14-3*02 F	G2B	0	0	0	1	1	0	0	0	0	2	0	2	3	Musmus IGHJ3*01 F	Musmus IGHD2-2*01 F	3	8.8.7	[0.17.38.11]	CPQGSFAYW	in-frame	+	tggcttcaacattaaagacacctatatgcactgggttaagcagaggcctgaacagggcctggagtggattggaaggattgatcctgcgaatggtaatactagatatgccccgaagttccagggcaaggccactataacagcagacacatcctccaacacagcctacctgcagctcagcagcctgacatctgaggacactgccgtctattactgtccccagggttcgtttgcttactggggccaagggactctggtcactgtctctgcagccaaaacaacacccccatcagtctatccactggcccctgggtgtggagatacaactggttcctccgtgactctgggatgcctggtcaagggctattt
	M82a3_MsVHE	Musmus IGHV1S135*01 [F]	M	1	0	1	4	0	4	1	0	1	8	2	6	14	Musmus IGHJ2*01 F	Musmus IGHD1-1*01 F	3	8.8.11	[13.17.38.11]	CTRYTYANYFDYW	in-frame	+	gagattggcgcttcagtgaagatatcctgcaaggcttctggttactcattcactggctacaacatgaactgggtgaagcagagcagtggaaagagccttgagtggattggaaatattgatccttactatggtggtactaggtacaaccagaggttcatgggcaaggccacattgactgtagacaaatcctccagcacagccttcatggagctcaagagcctgacatctgaggactctgcagtctattactgtacaagatatacctatgctaactactttgactactggggccaaggcaccactctcacagtctcctcagagagtcagtccttcccaaattcttccc
	M82b1x_MsVHE	Musmus IGHV1-26*01 F	M	4	1	3	3	0	3	1	0	1	4	3	1	12	Musmus IGHJ4*01 F	Musmus IGHD2-3*01 F	2	8.8.12	[8.17.38.11]	CARWLLRDYAMDYW	in-frame	+	gtgaagatatcctgcaaggcttctggttactcattcactggctactacatgcactgggtgaagcagagccatggaaagagccttgagtggattggacgtgttaatcctaacaatggtggtactagctacaaccagaagttcaagggcaaggccatattaactgtagacaagtcatccagcacagcctacatggagctccgcagcctgacatctgaggactctgcggtctattactgtgcaagatggttactacgggactatgctatggactactggggtcaaggaacctcagtcaccgtctcctcagagagtcagtccttcccaaatgtcttccccctgag
	M82b4_MsVHE	Musmus IGHV1S135*01 [F]	M	4	1	3	0	0	0	0	0	0	1	0	1	5	Musmus IGHJ3*01 F			8.8.9	[14.17.38.11]	CARSPAWFAYW	in-frame	+	tggtgagctggggcttcagtgaaggtatcctgcaaggcttctggttatgcattcactagctacaacatgtactgggtgaagcagagccatggaaagagccttgagtggattggatatattgatccttacaatggtggtactagctacaaccagaagttcaagggcaaggccacattgactgttgacaagtcctccagcacagcctacatgcatctcaacagcctgacatctgaggactctgcagtctattactgtgcaagatccccggcctggtttgcttactggggccaagggactctggtcactgtctctgcagagagtcagtccttcccaaattcttcc
	M82b6_MsVHE	Musmus IGHV1-9*01 F	G1	3	0	3	2	1	1	1	0	1	3	1	2	9	Musmus IGHJ2*01 F (see comment)	Musmus IGHD2-1*01 F	2	8.8.9	[14.17.38.11]	CARGELFFDYW	in-frame	+	atgaagcctggggcctcagtgaagatttcctgcagggctactggcaacacattcagtagctactggatagactgggtaaaacagaggcctggacatggccttgagtggattggagagattttacctggaagtgatagtactaactacaatgagaagttcaagggcaaggccacattcactgcagatacatcctccaacacagcctacatgcaactcagcagcctgacatctgaggactctgccgtctattattgtgcaagaggggaactgttctttgactactggggccaaggcaccactctcacagtctcctcagccaaaacgacacccccatctgtctatccactggcccctggatctgctgcccaaactaactccatggtgaccctgggatgcctg…
	M82c1_MsVHE	Musmus IGHV1S137*01 [F]	M	0	0	0	0	0	0	0	0	0	4	2	2	4	Musmus IGHJ2*01 F (see comment)			8.8.13	[14.17.38.11]	CARGAYYRYGYFDYW (see V-DOMAIN Functionality comment)	in-frame	+	tgtgaggctggggtctcagtgaagatttcctgcaagggttctggctacacattcactgattatgctatgcactgggtgaagcagagtcatgcaaagagtctagagtggattggagttattagtacttactatggtgatgctagctacaaccagaagttcaagggcaaggccacaatgactgtagacaaatcctccagcacagcctatatggaacttgccagactgacatctgaggattctgccatctattactgtgcaagaggggcctactataggtacgggtactttgactactggggccaaggcaccactctcacagtctcctcagagagtcagtccttcccaaattcttcc
	M82c3_MsVHE	Musmus IGHV5-9-3*01 F	M	1	0	1	0	0	0	1	0	1	2	1	1	4	Musmus IGHJ3*01 F	Musmus IGHD2-14*01 F	3	8.8.14	[14.17.38.11]	CARAYYRFDEEAFAYW	in-frame	+	gctagtgagcctggagggtcctgaactctcctgtgtagcctctggattcactttcagtaactatgccatgtcttgggttcgccagactccggagaagaggctggagtgggtcgcaaccattagtggtggtggtagttacacctgctatccagacagtgtgaagggtcgattcaccatctccagagacaatgccaagaacaccctgtacctacaaatgagcagtctgaggtctgaggacacggccatgtattactgtgcaagggcctactataggttcgacgaagaggcctttgcttactggggccaagggactctggtcactgtctctgcagagagtcagtccttcccaaatgtcttccccc
	M82d5_MsVHE	Musmus IGHV1-19*01 F	M	1	1	0	6	0	6	2	1	1	2	2	0	11	Musmus IGHJ4*01 F	Musmus IGHD2-2*01 F	3	8.8.11	[14.17.38.11]	CARWGYYDAMDYW	in-frame	+	tggtgagcctggggcttcagtgaagatgtcctgtaaggcttctggatacacattcactgactactacatggactgggtgaagcagagccatggagaaagctttgagtggattggacgtgttaatccttacaatggtggtactagctacaaccagaagttcaagggcaaggccacattgactgttgacaagtcctccagcacagcctacatggagctcaacagcctgacatctgaggactctgcggtctattattgtgcaagatggggttactacgatgctatggactactggggtcaaggaacctcagtcaccgtctcctcagagagtcagtccttcccaaattcttccc
	M82d6_MsVHE	Musmus IGHV2-9*02 F	M	0	0	0	0	0	0	0	0	0	0	0	0	0	Musmus IGHJ2*01 F	Musmus IGHD2-2*01 F	1	8.7.11	[11.17.38.11]	CARGVGTHYFDYW	in-frame	+	gctcacagagcctgtccatcacttgcactgtctctgggttttcattaaccagctatggtgtacactgggttcgccagcctccaggaaagggtctggagtggctgggagtaatatgggctggtggaagcacaaattataattcggctctcatgtccagactgagcatcagcaaagacaactccaagagccaagttttcttaaaaatgaacagtctgcaaactgatgacacagccatgtactactgtgccagaggggttgggacccactactttgactactggggccaaggcaccactctcacagtctcctcagagagtcagtccttcccaaatgcccttc
	M82e2x_MsVHE	Musmus IGHV1-15*01 F	M	1	0	1	0	0	0	0	0	0	1	0	1	2	Musmus IGHJ4*01 F	Musmus IGHD4-1*01 F	1	7.8.12	[X.17.38.11]	CTRWAGTDYAMDYW	in-frame	+	tacaaatttactgactatgaaatgcactgggtgaagcagacacctgtgcatggcctggaatggattggagctattgatcctgaaactggtggtactgcctacaatcagaagttcaagggcaaggccacactgactgcagacaaatcctccagcacagcctacatggagctccgcagcctgacatctgaggactctgccgtctattactgtacaagatgggctgggacggactatgctatggactactggggtcaaggaacctcagtcaccgtctcctcagagagtcagtccttcccaaatgact
	M82e3_MsVHE	Musmus IGHV3-8*02 F	G2A	0	0	0	1	0	1	0	0	0	2	0	2	3	Musmus IGHJ2*01 F	Musmus IGHD2-3*01 F	3	8.7.10	[13.17.38.11]	CANYDGYHFDYW	in-frame	+	tcgtgacttctcagactctgtccctcacctgttctgtcactggcgactccatcaccagtggttactggaactggatccggaaattcccagggaataaatttgagtacatggggtacataagctacagtggtagcacttactacaatccatctctcaaaagtcgaatctccatcactcgagacacatccaagaaccagttctacctgcagttgaattctgtgactactgaggacacagccacatatttctgtgcaaactatgatggttaccactttgactactggggccaaggcaccactctcacagtctcctcagccaaaacaacagccccatcggtctatccactggcccctgtgtgtggagatacaactggctcctcggtgactctaggatgcctgg…
	M82f3_MsVHE	Musmus IGHV1-9*01 F	G1	3	0	3	1	0	1	2	0	2	6	2	4	12	Musmus IGHJ2*01 F (see comment)	Musmus IGHD2-1*01 F	2	8.8.9	[0.17.38.11]	CARGELFFDYW	in-frame	+	gtggcttcacattcagtagctactggatggagtgggtaaagcagaggcctggacatggccttgagtggattggagagattttacctggaagtgatagtattaactccaatgagaagttcaagggaaaggccacattcactgcagatacaacctccaacacagcctacatgcaactcagcagcctgacatctgaggactctgccgtctattattgtgcaagaggggaactgttctttgactactggggccaaggcaccactctcacagtctcctcagccaaaacgacacccccatctgtctatccactggcccctggatctgctgcccaaactaactccatggtgaccctgggatgcctggtcaagggctactcc
	M82f5_MsVHE	Musmus IGHV1-9*01 F (see comment)	G2B	5	0	5	1	1	0	2	0	2	7	1	6	15	Musmus IGHJ2*02 F	Musmus IGHD1-1*02 F	3	8.7.9	[14.17.38.11]	CARGGYYFDYW	in-frame	+	gatgagcctggggcctcagtgaggatatcctgcaaggctactggcttcacattcagtacctactgcatagagtgggtaaaacagaggcctggacatggccttgagtggattggagagattttacctggagataatactacctacagtgagaatttcaagggcaaggccacattcactgcagatacatcctccaacacagccttcatgcaactcagcagcctgacatctgaggactctgccgtctattattgtgcaagagggggttactactttgactactggggccaaggcacctctctcacagtctcctcagccaaaacaacacccccatcagtctatccactggcccctgggtgtggagatacaactggttcctccgtgactctgggatgcctggtc…
	M82f6_MsVHE	Musmus IGHV1-54*01 F, or Musmus IGHV1-54*03 [F]	G3	0	0	0	0	0	0	1	0	1	5	2	3	6	Musmus IGHJ3*01 F	Musmus IGHD3-3*01 F	1	8.8.10	[14.17.38.11]	CARGRGAWFPYW	in-frame	+	tggtaggcctgggacttcagtgaaggtgtcctgcaaggcttctggatacgccttcactaattacttgatagagtgggtaaagcagaggcctggacagggccttgagtggattggagtgattaatcctggaagtggtggtagtaaccacaatgcgaagttcaagggcaaggcaacactgactgcagacaaatcttccagcactgcctacatgcagctcagcagcctgacttctgatgactctgcggtctatttctgtgcaagggggaggggggcctggtttccttactggggccaagggactctggtcactgtctctgcagctacaacaacagccccatctgtctatcccttggtccctggctgcagtgacacatctggatcctcggtgacactgggatg…
	M82g3_MsVHE	Musmus IGHV1-9*01 F	G3	2	0	2	1	1	0	1	0	1	8	1	7	12	Musmus IGHJ1*01 F	Musmus IGHD3-1*01 F	2	8.8.14	[7.17.38.11]	CASREPLYGDWYFDVW	in-frame	+	aagatatcctgcaaggctactggctacacattcagtagctactggatagagtgggtaaaacagaggcctggacatggccttgagtggattggagagattttacctggaagtggtaggactgagtataatgtgaagttcaagggcaaggccacattcactgcagatacatcctccaacacagcctacatgcatctcaacagcctgacatctgaggactctgccgtctattactgtgcaagccgggaacctctctacggggactggtacttcgatgtctggggcgcagggaccacggtcaccgtctcctcagctacaacaacagccccatctgtctatcccttggtccctggctgcagtgacacatctggatcctcggtgacactgggatgccttgtcaaa…
	GC B-cell VH sequences analysed by IMGT V-Quest. FR1 regions excluded from mutation analysis
	Sequences are arranged in blocks according to immunisation history and mouse from which they were derived
