# Supplementary material for: Variant proteins stimulate more IgM+ GC B-cells revealing a mechanism of cross-reactive recognition by antibody memory
Source: eLife. 2018 May 1;7:e26832. doi: 10.7554/eLife.26832 (PMC5959717; doi:10.7554/eLife.26832)
Supplement: Supplementary file 2. [file elife-26832-supp2.xlsx]

## Sheet: Sheet1
rAb data
Mouse Group	Mouse number in group	Clone No.	Isotype	anti-E4 O.D.*	Sequence ID	VH-GENE and allele	JH-GENE and allele	D-GENE and allele	VH Clone seq	VK-GENE and allele	JK-GENE and allele	VK Clone seq
E4 Prime day 7	1	A1	M	0.116	M61f1	Musmus IGHV14-3*02 F	Musmus IGHJ3*01 F	Musmus IGHD2-1*01 F	TCTACACATACGATTTAGGTGACACTATAGAATAACATCCACTTTGCCTTTCTCTCCACAGGTGTCCACTCCCAGGTCCAACTGCACCTCGGTTCTATCGATTGAATTCCACCATGGGATGGTCATGTATCATCCTTTTTCTAGTAGCAACTGCAACCGGTGTACATTCCGAGGTGCAGCTGCAGCAGTCTGGGGCAGAGCTTGTGAAGCCAGGGGCCTCAGTCAAGTTGTCCTGCACAGCTTCTGGCTTCAACATTAAAGACACCTATATGCACTGGGTGAAGCAGAGGCCTGAACAGGGCCTGGAGTGGATTGGAAGGATTGATCCTGCGAATGGTAATACTAAATATGACCCGAAGTTCCAGGGCAAGGCCACTATAACAGCAGACACATCCTCCA…	Musmus IGKV9-120*01 F	Musmus IGKJ2*01 F	CTACACATACGATATTAGGTAGACACTATAGAATAACATCCACTTTGCCTTTCTCTCCACAGGTGTCCACTCCCAGGTCCAACTGCACCTCGGTTCTATCGATTGAATTCCACCATGGGATGGTCATGTATCATCCTTTTTCTAGTAGCAACTGCAACCGGTGTACATTCCGACATCCAGATGACCCAGTCTCCATCCTCCTTATCTGCCTCTCTGGGAGAAAGAGTCAGTCTCACTTGTCGGGCAAGTCAGGACATTGGTAGTAGCTTAAACTGGCTTCAGCAGGAACCAGATGGAACTATTAAACGCCTGATCTACGCCACATCCAGTTTAGATTCTGGTGTCCCCAAAAGGTTCAGTGGCAGTAGGTCTGGGTCAGATTATTCTCTCACCATCAGC…
	1	B1	G1	0.018	M61b2	Musmus IGHV1S135*01 [F]	Musmus IGHJ2*01 F	Musmus IGHD1-1*01 F	ATCTACACATACGATTTAGGTGACACTATAGAATAACATCCACTTTGCCTTTCTCTCCACAGGTGTCCACTCCCAGGTCCAACTGCACCTCGGTTCTATCGATTGAATTCCACCATGGGATGGTCATGTATCATCCTTTTTCTAGTAGCAACTGCAACCGGTGTACATTCCCAGATCCAGCTGCAGCAGTCTGGACCTGAGCTGGTGAAGCCTGGGGCTTCAGTGAAGGTATCCTGCAAGGCTTCTGGTTATGCATTCACTAGCTACAACATGTACTGGGTGAAGCAGAGCCATGGAAAGAGCCTTGAGTGGATTGGATATATTGATCCTTACAATGGTGGTACTAGCTACAACCAGAAGTTCAAGGGCAAGGCCACATTGACTGTTGACAAGTCCTCC…	Musmus IGKV3-4*01 F	Musmus IGKJ4*01 F (see comment)	TCTACACATACGATTTAGGTGACACTATAGAATAACATCCACTTTGCCTTTCTCTCCACAGGTGTCCACTCCCAGGTCCAACTGCACCTCGGTTCTATCGATTGAATTCCACCATGGGATGGTCATGTATCATCCTTTTTCTAGTAGCAACTGCAACCGGTGTACATTCCGACATTGTGCTGACCCAATCTCCAGCTTCTTTGGCTGTGTCTCTAGGGCAGAGGGCCACCATCTCCTGCAAGGCCAGCCAAAGTGTTGATTATGATGGTGATAGTTATATGAACTGGTACCAACAGAAACCAGGACAGCCACCCAAACTCCTCATCTATGCTGCATCCAATCTAGAATCTGGGATCCCAGCCAGGTTTAGTGGCAGTGGGTCTGGGACAGACTTCACCC…
	1	C1	M	-0.048	M61d2	Musmus IGHV3-2*02 F	Musmus IGHJ2*01 F	Musmus IGHD2-14*01 F	TCTACACATACGATTTAGGTGACACTATAGAATAACATCCACTTTGCCTTTCTCTCCACAGGTGTCCACTCCCAGGTCCAACTGCACCTCGGTTCTATCGATTGAATTCCACCATGGGATGGTCATGTATCATCCTTTTTCTAGTAGCAACTGCAACCGGTGTACATTCCGATGTGCAGCTTCAGGAGTCGGGACCTGGCCTGGTGAAACCTTCTCAGTCTCTGTCCCTCACCTGCACTGTCACTGGCTACTCAATCACCAGTGATTATGCCTGGAACTGGATCCGGCAGTTTCCAGGAAACAAACTGGAGTGGATGGGCTACATAAGCTACAGTGGTAGCACTAGCTACAACCCATCTCTCAAAAGTCGAATCTCTATCACTCGAGACACATCCAAGA…	Musmus IGKV8-27*01 F	Musmus IGKJ2*01 F	TCTACACATACGATTTAGGTAGACACTATAGAATAACATCCACTTTGCCTTTCTCTCCACAGGTGTCCACTCCCAGGTCCAACTGCACCTCGGTTCTATCGATTGAATTCCACCATGGGATGGTCATGTATCATCCTTTTTCTAGTAGCAACTGCAACCGGTGTACATTCCAACATTATGATGACACAGTCGCCATCATCTCTGGCTGTGTCTTCAGGAGAAAAGGTCACTATGAGCTGTAAGTCCAGTCAAAGTGTTTTATACAGTTCAAATCAGAAGAACTACTTGGCCTGGTACCAGCAGAAACCAGGGCAGTCTCCTAAACTGCTGATCTACTGGGCATCCACTAGGGAATCTGGTGTCCCTGATCGCTTCACAGGCAGTGGATCTGGGACAGAT…
	1	D1	M	0.035	M61a4	Musmus IGHV2-9*02 F	Musmus IGHJ2*01 F		TCTACACATACGATTTAGGTGACACTATAGAATAACATCCACTTTGCCTTTCTCTCCACAGGTGTCCACTCCCAGGTCCAACTGCACCTCGGTTCTATCGATTGAATTCCACCATGGGATGGTCATGTATCATCCTTTTTCTAGTAGCAACTGCAACCGGTGTACATTCCGATGTACAGCTTCAGGAGTCAGGACCTGGCCTGGTGGCGCCCTCACAGAGCCTGTCCATCACTTGCACTGTCTCTGGGTTTTCATTAACCAGCTATGGTGTACACTGGGTTCGCCACCCTCCAGGAAAGGGTCTGGAGTGGCTGGGAGTAATATGGGCTGGTGGAAGCACAAATTATAATTCGGCTCTCATGTCCAGACTGAGCATCAGCAAAGACAACTCCAAGAGCC…	Musmus IGKV10-96*01 F	Musmus IGKJ1*01 F	ATCTACACATACGATTTAGGTGACACTATAGAATAACATCCACTTTGCCTTTCTCTCCACAGGTGTCCACTCCCAGGTCCAACTGCACCTCGGTTCTATCGATTGAATTCCACCATGGGATGGTCATGTATCATCCTTTTTCTAGTAGCAACTGCAACCGGTGTACATTCCGATATCCAGATGACACAGACTACATCCTCCCTGTCTGCCTCTCTGGGAGACAGAGTCACCATCAGTTGCAGGGCAAGTCAGGACATTAGCAATTATTTAAACTGGTATCAGCAGAAACCAGATGGAACTGTTAAACTCCTGATCTACTACACATCAAGATTACACTCAGGAGTCCCATCAAGGTTCAGTGGCAGTGGGTCTGGAACAGATTATTCTCTCACCATTAGC…
	2	E1	M	-0.054	M62f2	Musmus IGHV1-4*01 F	Musmus IGHJ2*01 F	Musmus IGHD2-2*01 F	TCTACACATACGATTTAGGTGACACTATAGAATAACATCCACTTTGCCTTTCTCTCCACAGGTGTCCACTCCCAGGTCCAACTGCACCTCGGTTCTATCGATTGAATTCCACCATGGGATGGTCATGTATCATCCTTTTTCTAGTAGCAACTGCAACCGGTGTACATTCCCAGGTGCAGCTGCAGCAGTCTGGGGCTGAACTGGCAAAACCTGGGGCCTCAGTGAAGATGTCCTGCAAGGCTTCTGGCTACACCTTTACTAGCTACTGGATGAACTGGGTAAAACAGAGGCCTGGACAGGGTCTGGAATGGATTGGATACATTAATCCTAGCACTGGTTATACTGAGTACAATCAGAAGTTCAAGGACAAGGCCACATTGACTGCAGACAAATCCTCCA…	Musmus IGKV8-30*01 F	Musmus IGKJ1*01 F	CAGACACATATAGAATAACATCCACTTTGCCTTTCTCTCCACAGGTGTCCACTCCCAGGTCCAACTGCACCTCGGTTCTATCGATTGAATTCCACCATGGGATGGTCATGTATCATCCTTTTTCTAGTAGCAACTGCAACCGGTGTACATTCCGACATTGTGATGTCACAGTCTCCATCCTCCCTTGCTGTGTCAGTTGGAGAGAAGGTTACTATGAACTACAAGTCCAGTCAGAGCCTTTTATATAGTTACAATCAAAAGAACTACTTGGCCTGGTACCAGCAGAAACCAGGGCAGTCTCCTAAACTGCTGATTTACTGGGCATCCACTAGGGAATCTGGGGTCCCTGATCGCTTCACAGGCAGTGGATCTGGGACAGATTTCACTCTCACCATCAGC…
	2	F1	M	-0.052	M62b3	Musmus IGHV2-3*01 F	Musmus IGHJ4*01 F	Musmus IGHD2-12*01 F	ATCTACACATACGATTTAGGTGACACTATAGAATAACATCCACTTTGCCTTTCTCTCCACAGGTGTCCACTCCCAGGTCCAACTGCACCTCGGTTCTATCGATTGAATTCCACCATGGGATGGTCATGTATCATCCTTTTTCTAGTAGCAACTGCAACCGGTGTACATTCCCAGATGCAGCTTCAGGAGTCAGGACCTGGCCTGGTGGCGCCCTCACAGAGCCTGTCCATCACATGCACTGTCTCAGGGTTCTCATTAACCAGCTATGGTGTAAACTGGGTTCGCCAGCCTCCAGGAAAGGGTCTGGAGTGGCTGGGAGTAATATGGGGTGACGGGAACACAAATTATCATTCAGCTCTCATATCCAGACTGAGCATCAGCAAGGATAACTCCAAGAGC…	Musmus IGKV17-121*01 F	Musmus IGKJ2*01 F, or Musmus IGKJ5*01 F (see comment)	CAGACACATATAGAATAACATCCACTTTGCCTTTCTCTCCACAGGTGTCCACTCCCAGGTCCAACTGCACCTCGGTTCTATCGATTGAATTCCACCATGGGATGGTCATGTATCATCCTTTTTCTAGTAGCAACTGCAACCGGTGTACATTCCGAAACAACTGTGACCCAGTCTCCAGCATCCCTGTCCATGGCTATAGGAGAAAAAGTCACCATCAGATGCATAACCAGCACTGATATTGATGATGATATGAACTGGTACCAGCAGAAGCCAGGGGAACCTCCTAAGCTCCTTATTTCAGAAGGCAATACTCTTCGTCCTGGAGTCCCATCCCGATTCTCCAGCAGTGGCTATGGTACAGATTTTGTTTTTACAATTGAAAACATGCTCTCAGAAGAT…
	2	G1	M	0.059	M62h3	Musmus IGHV1-9*01 F	Musmus IGHJ2*01 F	Musmus IGHD2-1*01 F	ATCTACACATACGATTTAGGTGACACTATAGAATAACATCCACTTTGCCTTTCTCTCCACAGGTGTCCACTCCCAGGTCCAACTGCACCTCGGTTCTATCGATTGAATTCCACCATGGGATGGTCATGTATCATCCTTTTTCTAGTAGCAACTGCAACCGGTGTACATTCCCAGGTGCAGCTGCAGCAGTCTGGAGCTGAGCTGATGAAGCCTGGGGCCTCAGTGAAGATATCCTGCAAGGCTTCTGGCTACACATTCAGTAGCTACTGGATAGAGTGGGTAAAGCAGAGGCCTGGACATGGCCTTGAGTGGATTGGAGAGATTTTACCTGGAAGTGGTAGTACTAACTACAATGAGAAGTTCAAGGGCAAGGCCACATTCACTGCAGATACATCCTCC…	Musmus IGKV14-111*01 F	Musmus IGKJ5*01 F	CATACGATATTAGGTGACACTATAGAATAACATCCACTTTGCCTTTCTCTCCACAGGTGTCCACTCCCAGGTCCAACTGCACCTCGGTTCTATCGATTGAATTCCACCATGGGATGGTCATGTATCATCCTTTTTCTAGTAGCAACTGCAACCGGTGTACATTCCGACATCAAGATGACCCAGTCTCCATCTTCCATGTATGCATCTCTAGGAGAGAGAGTCACTATCACTTGCAAGGCGAGTCAGGACATTAATAGCTATTTAAGCTGGTTCCAGCAGAAACCAGGGAAATCTCCTAAGACCCTGATCTATCGTGCAAACAGATTGGTAGATGGGGTCCCATCAAGGTTCAGTGGCAGTGGATCTGGGCAAGATTATTCTCTCACCATCAGCAGCCTG…
	2	H1	M	0.077	M62b4	Musmus IGHV10-1*02 F	Musmus IGHJ4*01 F	Musmus IGHD2-1*01 F	ATCTACACATACGATTTAGGTGACACTATAGAATAACATCCACTTTGCCTTTCTCTCCACAGGTGTCCACTCCCAGGTCCAACTGCACCTCGGTTCTATCGATTGAATTCCACCATGGGATGGTCATGTATCATCCTTTTTCTAGTAGCAACTGCAACCGGTGTACATTCCGAGGTGCAGCTTGTTGAGTCTGGTGGAGGATTGGTGCAGCCTAAAGGGTCATTGAAACTCTCATGTGCAGCCTCTGGCTTCACCTTCAATACCTACGCCATGAACTGGGTCCGCCAGGCTCCAGGAAAGGGTTTGGAATGGGTTGCTCGCATAAGAAGTAAAAGTAATAATTATGCAACATATTATGCCGATTCAGTGAAAGACAGGTTCACCATCTCCAGAGATGAT…	Musmus IGKV17-121*01 F	Musmus IGKJ2*01 F, or Musmus IGKJ5*01 F (see comment)	TCTACACATACGATTTAGGTGACACTATAGAATAACATCCACTTTGCCTTTCTCTCCACAGGTGTCCACTCCCAGGTCCAACTGCACCTCGGTTCTATCGATTGAATTCCACCATGGGATGGTCATGTATCATCCTTTTTCTAGTAGCAACTGCAACCGGTGTACATTCCGAAACAACTGTGACCCAGTCTCCAGCATCCCTGTCCATGGCTATAGGAGAAAAAGTCACCATCAGATGCATAACCAACACTGATATTGATGATGATATGAACTGGTACCAGCAGAAGCCAGGGGAACCTCCTAATCTCCTTATTTCAGAAGGCAATACTCTTCGTCCTGGAGTCCCATCCCGATTCTCCAGCAGTGGCTATGGTACAGATTTTGTTTTTACAATTGAAA…
	2	A2	M	-0.014	M62c4	Musmus IGHV1S30*01 P, or Musmus IGHV1S30*02 F	Musmus IGHJ4*01 F	Musmus IGHD1-1*01 F	ATCTACACATACGATTTAGGTGACACTATAGAATAACATCCACTTTGCCTTTCTCTCCACAGGTGTCCACTCCCAGGTCCAACTGCACCTCGGTTCTATCGATTGAATTCCACCATGGGATGGTCATGTATCATCCTTTTTCTAGTAGCAACTGCAACCGGTGTACATTCCCAGATCCAGCTGCAGCAGTCTGGACCTGAGCTGGTGAAGCCTGGGGCTTCAGTGAAGATATCCTGCAAGGCTTCTGGTTACTCATTCACTGGCTACTACATGCACTGGGTGAAGCAAAGCCATGTAAAGAGCCTTGAGTGGATTGGACGTATTAATCCTTACAATGATACTACTAACTACAACCAGAATTTCAAGGACAAGGCCAGCTTGACTGTAGATAAGTCCTCC…	Musmus IGKV4-55*01 F	Musmus IGKJ1*01 F	ATCTACACATACGATTTAGGTAGACACTATAGAATAACATCCACTTTGCCTTTCTCTCCACAGGTGTCCACTCCCAGGTCCAACTGCACCTCGGTTCTATCGATTGAATTCCACCATGGGATGGTCATGTATCATCCTTTTTCTAGTAGCAACTGCAACCGGTGTACATTCCCAAATTGTTCTCACCCAGTCTCCAGCAATCATGTCTGCATCTCCAGGGGAGAAGGTCACCGTGACCTGCAGTGCCAGCTCAAGTGTAAGTTACATGTACTGGTACCAGCAGAAGCCAGGATCCTCCCCCAGACTCCTGATTTATGACACATCCAACCTGGCTTCTGGAGTCCCTGTTCGCTTCAGTGGCAGTGGGTCTGGGACCTCTTACTCTCTCACAATCAGCCG…
	3	B2	M	-0.051	M63a1	Musmus IGHV1-47*01 F	Musmus IGHJ4*01 F	Musmus IGHD2-1*01 F	ATCTACACATACGATTTAGGTGACACTATAGAATAACATCCACTTTGCCTTTCTCTCCACAGGTGTCCACTCCCAGGTCCAACTGCACCTCGGTTCTATCGATTGAATTCCACCATGGGATGGTCATGTATCATCCTTTTTCTAGTAGCAACTGCAACCGGTGTACATTCCCAGGTGCAGCTGCAGCAGTCTGGGGCTGAGCTGGTGAAGCCTGGGGCCTCAGTGAAGATGTCCTGCAAGGCTTTTGGCTACACCTTCACTACCTATCCAATAGAGTGGATGAAGCAGAATCATGGGAAGAGCCTAGAGTGGATTGGAAATTTTCATCCTTACAATGATGATACTAAGTACAATGAAAAATTCAAGGGCAAGGCCAAATTGACTGTAGAAAAATCCTCT…	Musmus IGKV9-124*01 F	Musmus IGKJ1*01 F	CTACACATACGATATTAGGTGACACTATAGAATAACATCCACTTTGCCTTTCTCTCCACAGGTGTCCACTCCCAGGTCCAACTGCACCTCGGTTCTATCGATTGAATTCCACCATGGGATGGTCATGTATCATCCTTTTTCTAGTAGCAACTGCAACCGGTGTACATTCCGACATCCAGATGACCCAGTCTCCATCCTCCTTATCTGCCTCTCTGGGAGAAAGAGTCAGTCTCACTTGTCGGGCAAGTCAGGAAATTAGTGGTTACTTAAGCTGGCTTCAGCAGAAACCAGATGGAACTATTAAACGCCTGATCTACGCCGCATCCACTTTAGATTCTGGTGTCCCAAAAAGGTTCAGTGGCAGTAGGTCTGGGTCAGATTATTCTCTCACCATCAGCA…
	3	C2	G2B	0.031	M63h1	Musmus IGHV1-9*01 F	Musmus IGHJ4*01 F	Musmus IGHD2-14*01 F	ATCTACACATACGATTTAGGTGACACTATAGAATAACATCCACTTTGCCTTTCTCTCCACAGGTGTCCACTCCCAGGTCCAACTGCACCTCGGTTCTATCGATTGAATTCCACCATGGGATGGTCATGTATCATCCTTTTTCTAGTAGCAACTGCAACCGGTGTACATTCCCAGGTGCAGCTGCAGCAGTCTGGAGCTGAGCTGATGAAGCCTGGGGCCTCAGTGAAGATATCCTGCAAGGCTACTGGCTACACATTCAGTAGCTACTGGATAGAGTGGGTAAAGCAGAGGCCTGGACATGGCCTTGAGTGGATTGGAGAGATTTTACCTGGAAGTGGTAGTACTAACTACAATGAGAAGTTCAAGGGCAAGGCCACATTCACTGCAGATACATCCTCC…	Musmus IGKV3-2*01 F	Musmus IGKJ1*01 F	CATACGATATTAGGTGACACTATAGAATAACATCCACTTTGCCTTTCTCTCCACAGGTGTCCACTCCCAGGTCCAACTGCACCTCGGTTCTATCGATTGAATTCCACCATGGGATGGTCATGTATCATCCTTTTTCTAGTAGCAACTGCAACCGGTGTACATTCCGACATTGTGCTGACCCAATCTCCAGCTTCTTTGGCTGTGTCTCTAGGGCAGAGGGCCACCATCTCCTGCAGAGCCAGCGAAAGTGTTGATAATTATGGCATTAGTTTTATGAACTGGTTCCAACAGAAACCAGGACAGCCACCCAAACTCCTCATCTATGCTGCATCCAACCAAGGATCCGGGGTCCCTGCCAGGTTTAGTGGCAGTGGGTCTGGGACAGACTTCAGCCTCAAC…
	3	D2	M	0.024	M63e2	Musmus IGHV14-1*02 F	Musmus IGHJ4*01 F		ATCTACACATACGATTTAGGTGACACTATAGAATAACATCCACTTTGCCTTTCTCTCCACAGGTGTCCACTCCCAGGTCCAACTGCACCTCGGTTCTATCGATTGAATTCCACCATGGGATGGTCATGTATCATCCTTTTTCTAGTAGCAACTGCAACCGGTGTACATTCCGAGGTGCAGCTGCAGCAGTCTGGGGCTGAGCTTGTGAGGCCAGGGGCCTTAGTCAAGTTGTCCTGCAAAGCTTCTGGCTTCAACATTAAAGACTACTATATGTACTGGGTGAAGCAGAGGCCTGAACAGGGCCTGGAGTGGATTGGATGGATTGATCCTGAGAATGGTAATACTATATATGACACGAAGTTCCAGGGCAAGGCCAGTATAACAGCAGACACATCCTCC…	Musmus IGKV14-126*01 F	Musmus IGKJ4*01 F (see comment)	TCTACACATACGATTTAGGTGACACTATAGAATAACATCCACTTTGCCTTTCTCTCCACAGGTGTCCACTCCCAGGTCCAACTGCACCTCGGTTCTATCGATTGAATTCCACCATGGGATGGTCATGTATCATCCTTTTTCTAGTAGCAACTGCAACCGGTGTACATTCCGACATCAAGATGACCCAGTCTCCATCCTCCATGTATGCATCGTTGGGAGAGAGAGTCACTATCACTTGCAAGGCGAGTCAGGACATTAAAAGCTATTTAAGCTGGTACCAGCAGAAACCATGGAAATCTCCTAAGACCCTGCTCTATTATGCAACAAGCTTGGCAGATGGGGTCCCATCAAGATTCAGTGGCAGTGGATCTGGGCAAGATTATTCTCTAACCATCAGCA…
	3	E2	M	0.26	M63h2	Musmus IGHV1S137*01 [F]	Musmus IGHJ2*01 F		ATCTACACATACGATTTAGGTGACACTATAGAATAACATCCACTTTGCCTTTCTCTCCACAGGTGTCCACTCCCAGGTCCAACTGCACCTCGGTTCTATCGATTGAATTCCACCATGGGATGGTCATGTATCATCCTTTTTCTAGTAGCAACTGCAACCGGTGTACATTCCCAGGTGCAGCTGCAGCAGTCTGGGCCTGAGCTGGTGAGGCCTGGGGTCTCAGTGAAGATTTCCTGCAAGGGTTCCGGCTACACATTCACTGATTATGCTATGCACTGGGTGAAGCAGAGTCATGCAAAGAGTCTTGAGTGGATTGGAGTTATTAGTACTTACTATGGTAATACAAACTACAACCAGAAGTTTAAGGGCAAGGCCACAATGACTGTAGACAAATCCTCC…	Musmus IGKV5-48*01 F	Musmus IGKJ5*01 F	GCACATTAGGTGACACTATAGAATAACATCCACTTTGCCTTTCTCTCCACAGGTGTCCACTCCCAGGTCCAACTGCACCTCGGTTCTATCGATTGAATTCCACCATGGGATGGTCATGTATCATCCTTTTTCTAGTAGCAACTGCAACCGGTGTACATTCCGACATCTTGCTGACTCAGTCTCCAGCCATCCTGTCTGTGAGTCCAGGAGAAAGAGTCAGTTTCTCCTGCAGGGCCAGTCAGAGCATTGGCACAAGCATACACTGGTATCAGCGAAGAACAAATGGTTCTCCAAGGCTTCTCATAAAGTATGCTTCTGAGTCTATCTCTGGGATCCCTTCCAGGTTTAGTGGCAGTGGATCAGGGACAGATTTTACTCTTAGCATCAACAGTGTGGAGT…
E4 Prime day 17	1	F2	M	-0.062	M81f1	Musmus IGHV2-6-7*01 F, or Musmus IGHV2-6-7*02 F	Musmus IGHJ4*01 F	Musmus IGHD3-1*01 F	ATCTACACATACGATTTAGGTGACACTATAGAATAACATCCACTTTGCCTTTCTCTCCACAGGTGTCCACTCCCAGGTCCAACTGCACCTCGGTTCTATCGATTGAATTCCACCATGGGATGGTCATGTATCATCCTTTTTCTAGTAGCAACTGCAACCGGTGTACATTCCGATGTACAGCTTCAGGAGTCAGGACCTGGCCTGGTGGCGCCCTCACAGAGCCTGTCCATCACATGCACCGTCTCAGGGTTCTCATTAACCGGCTTTGGTGTAAACTGGGTTCGCCAGCCTCCAGGAAAGGGTCTGGAGTGGCTGGGAATGATATGGGGTGATGGAAACACAGACTATAATTCAGCTCTCAAATCCAGACTGAGCATCAGCAAGGACAACTCCAAGAGC…	Musmus IGKV4-57-1*01 F	Musmus IGKJ5*01 F	ATATTAGGTAGACACTATAGAATAACATCCACTTTGCCTTTCTCTCCACAGGTGTCCACTCCCAGGTCCAACTGCACCTCGGTTCTATCGATTGAATTCCACCATGGGATGGTCATGTATCATCCTTTTTCTAGTAGCAACTGCAACCGGTGTACATTCCCAAATTGTTCTCACCCAGTCTCCAGCAATCATGTCTGCATCTCCAGGGGAAAAGGTCACCATGACCTGCAGGGCCAGCTCAAGTGTAAGTTCCAGTTACTTGCACTGGTACCAGCAGAAGTCAGGTGCCTCCCCCAAACTCTGGATTTATAGCACATCCAACTTGGCTTCTGGAGTCCCTGCTCGCTTCAGTGGCAGTGGGTCTGGGACCTCTTACTCTCTCACAATCAGCAGTGTGGA…
	1	G2	M	0.748	M81f3	Musmus IGHV1-37*01 F	Musmus IGHJ1*01 F	Musmus IGHD2-5*01 F	ATCTACACATACGATTTAGGTGACACTATAGAATAACATCCACTTTGCCTTTCTCTCTACAGGTGTCCACTCCCAGGTCCAACTGCACCTCGGTTCTATCGATTGAATTCCACCATGGGATGGTCATGTATCATCCTTTTTCTAGTAGCAACTGCAACCGGTGTACATTCCGAGGTGCAGCTGCAGCAGTCTGGACCTGAGCTGGTGAAGCCTGGGGCTTCAGTGAAGATATCCTGCAAGGCTTCTGGTTACTCATTTACTGGCTACTTTATGAACTGGGTGAAGCAGAGCCATGGAAAGAGCCTTGCGTGGATTGGACGTATTAATCCTTACAATGGTGATACTTTCTACAACCAGAAGTTCAAGGGCAAGGCCACATTGACTGTAGACAAATCCTCT…	Musmus IGKV3-3*01 F	Musmus IGKJ2*01 F	ACGACATTAGGTGACACTATAGAATAACATCCACTTTGCCTTTCTCTCCACAGGTGTCCACTCCCAGGTCCAACTGCACCTCGGTTCTATCGATTGAATTCCACCATGGGATGGTCATGTATCATCCTTTTTCTAGTAGCAACTGCAACCGGTGTACATTCCGACATTGTGCTGACCCAATCTCCAGCTTCTTTGGCTGTGTCTCTAGGACAGAGAGCCACTATCTTCTGCAGAGCCAGCCAGAGTGTCGATTATAATGGAATTAGTTATATGCACTGGTTCCAACAGAAACCAGGACAGCCACCCAAACTCCTCATCTATGCTGCATCCAACCTAGAATCTGGGATCCCTGCCAGGTTCAGTGGCAGTGGGTCTGGGACAGACTTCACCCTCAACATC…
	1	H2	M	0.002	M81g3	Musmus IGHV1-15*01 F	Musmus IGHJ2*01 F	Musmus IGHD2-3*01 F	ATCTACACATACGATTTAGGTGACACTATAGAATAACATCCACTTTGCCTTTCTCTCCACAGGTGTCCACTCCCAGGTCCAACTGCACCTCGGTTCTATCGATTGAATTCCACCATGGGATGGTCATGTATCATCCTTTTTCTAGTAGCAACTGCAACCGGTGTACATTCCCAGGTGCAGCTGCAGCAGTCTGGGGCTGAGCTGGTGAGGCCTGGGGCTTCAGTGACGCTGTCCTGCAAGGCTTCGGGCTACACATTTACTGACTATGAAATGCACTGGGTGAAGCAGACACCTGTGCATGGCCTGGAATGGATTGGAACTATTGATCCTGAAACTGGTGGTACTGCCTACAATCAGAAGTTCAAGGGCAAGGCCACACTGACTGCAGACAAATCCTCC…	Musmus IGKV4-73*01 F	Musmus IGKJ2*01 F, or Musmus IGKJ2*03 F or Musmus IGKJ5*01 F (see comment)	TCTACACATACGATTTAGGTGACACATATAGAATAACATCCACTTTGCCTTTCTCTCCACAGGTGTCCACTCCCAGGTCCAACTGCACCTCGGTTCTATCGATTGAATTCCACCATGGGATGGTCATGTATCATCCTTTTTCTAGTAGCAACTGCAACCGGTGTACATTCCCAAATTGTTCTCACCCAGTCTCCAGCAATCATGTCTGCTTCTCCTGGGGAACGGGTCACCATGACCTGCAGTGCCAGCTCAAGTGTAAGTTCCAGCTACTTGTACTGGTACCAGCAGAAGTCAGGATCCTCCCCAAAACTCTGGATTTATAGCATATCCAACCTGGCTTCTGGAGTCCCAACTCGCTTCAGTGGCAGTGGGTCTGGGACCTCTTACTCTCTCACAATC…
	1	A3	G2B	0.012	M81h3	Musmus IGHV14-3*02 F	Musmus IGHJ3*01 F	Musmus IGHD2-2*01 F	ATCTACACATACGATTTAGGTGACACTATAGAATAACATCCACTTTGCCTTTCTCTCCACAGGTGTCCACTCCCAGGTCCAACTGCACCTCGGTTCTATCGATTGAATTCCACCATGGGATGGTCATGTATCATCCTTTTTCTAGTAGCAACTGCAACCGGTGTACATTCCGAGGTGCAGCTGCAGCAGTCTGGGGCGGAGCTTGTGAAGCCAGGGGCCTCAGTCAAGTTGTCCTGCACAGCTTCTGGCTTCAACATTAAAGACACCTATATGCACTGGGTTAAGCAGAGGCCTGAACAGGGCCTGGAGTGGATTGGAAGGATTGATCCTGCGAATGGTAATACTAGATATGCCCCGAAGTTCCAGGGCAAGGCCACTATAACAGCAGACACATCCTCC…	Musmus IGKV4-74*01 F	Musmus IGKJ2*01 F, or Musmus IGKJ2*03 F or Musmus IGKJ5*01 F (see comment)	GATTTAGGTGACACTATAGAATAACATCCACTTTGCCTTTCTCTCCACAGGTGTCCACTCCCAGGTCCAACTGCACCTCGGTTCTATCGATTGAATTCCACCATGGGATGGTCATGTATCATCCTTTTTCTAGTAGCAACTGCAACCGGTGTACATTCCCAAATTGTTCTCACCCAGTCTCCAGCAATCATGTCTGCATCTCTAGGGGAACGGGTCACCATGACCTGCACTGCCAGCTCAAGTGTAAGTTCCAGTTACTTGCACTGGTACCAGCAGAAGCCAGGATCCTCCCCCAAACTCTGGATTTATAGTACATCCAACCTGGCTTCTGGAGTCCCAACTCGCTTCGGTGGCAGTGGGTCTGGGACCTCTTACTCTCTCACAATCAGCAGCATGGAG…
	1	B3	M	-0.034	M81g6	Musmus IGHV3-8*02 F	Musmus IGHJ4*01 F	Musmus IGHD2-14*01 F	ATCTACACATACGATTTAGGTGACACTATAGAATAACATCCACTTTGCCTTTCTCTCCACAGGTGTCCACTCCCAGGTCCAACTGCACCTCGGTTCTATCGATTGAATTCCACCATGGGATGGTCATGTATCATCCTTTTTCTAGTAGCAACTGCAACCGGTGTACATTCCCAGATGCAGCTTCAGGAGTCAGGACCTAGCCTCGTGAAACCTTCTCAGACTCTGTCCCTCACCTGTTCTGTCACTGGCGACTCCATCACCAGTGGTTACTGGAACTGGATCCGGAAATTCCCAGGGAATAAACTTGAGTACATGGGGTACATAACCTACAGTGGTAGCACTTACTACAATCCATCTCTCAAAAGTCGAATCTCCATCACTCGAGACACATCCAAGAAC…	Musmus IGKV3-4*01 F	Musmus IGKJ1*01 F	AGGTGACACTATAGAATAACATCCACTTTGCCTTTCTCTCCACAGGTGTCCACTCCCAGGTCCAACTGCACCTCGGTTCTATCGATTGAATTCCACCATGGGATGGTCATGTATCATCCTTTTTCTAGTAGCAACTGCAACCGGTGTACATTCCGACATTGTGCTGACCCAATCTCCAGCTTCTTTGGCTGTGTCTCTAGGGCAGAGGGCCACCATCTCCTGCAAGGCCAGCCAAAGTGTTGATTATGATGGTGATAGTTATATGAACTGGTACCAACAGAAACCAGGACAGCCACCCAAACTCCTCATCTATGCTGCATCCAATCTAGAATCTGGGATCCCAGCCAGGTTTAGTGGCAGTGGGTCTGGGACAGACTTCACCCTCAACATCCATCCTGT…
	2	C3	M	0.056	M82b1x	Musmus IGHV1-26*01 F	Musmus IGHJ4*01 F	Musmus IGHD2-3*01 F	ATCTACACATACGATTTAGGTGACACTATAGAATAACATCCACTTTGCCTTTCTCTCCACAGGTGTCCACTCCCAGGTCCAACTGCACCTCGGTTCTATCGATTGAATTCCACCATGGGATGGTCATGTATCATCCTTTTTCTAGTAGCAACTGCAACCGGTGTACATTCCGAGGTGCAGCTGCAGCAGTCTGGACCTGACCTGGTGAAGCCTGGGGCTTCAGTGAAGATATCCTGCAAGGCTTCTGGTTACTCATTCACTGGCTACTACATGCACTGGGTGAAGCAGAGCCATGGAAAGAGCCTTGAGTGGATTGGACGTGTTAATCCTAACAATGGTGGTACTAGCTACAACCAGAAGTTCAAGGGCAAGGCCATATTAACTGTAGACAAGTCATCC…	Musmus IGKV3-4*01 F	Musmus IGKJ1*01 F	GCACATTAGGTGACACTATAGAATAACATCCACTTTGCCTTTCTCTCCACAGGTGTCCACTCCCAGGTCCAACTGCACCTCGGTTCTATCGATTGAATTCCACCATGGGATGGTCATGTATCATCCTTTTTCTAGTAGCAACTGCAACCGGTGTACATTCCGACATTGTGCTGACCCAATCTCCAGCTTCTTTGGCTGTGTCTCTAGGGCAGAGGGCCACCATCTCCTGCAAGACCAGCCAAAGTGTTGATTATGATGGTGATAGTTATATGAACTGGTACCAACAGAAACCAGGACAGCCACCCAAACTCCTCATCTATGCTGCATCCAATCTAGAATCTGGGATCCCAGCCAGGTTTAGTGGCAGTGGGTCTGGGACAGACTTCACCCTCAACATCC…
	2	D3	M	0.401	M82c1	Musmus IGHV1S137*01 [F]	Musmus IGHJ2*01 F		TCTACACATACGATTTAGGTGACACTATAGAATAACATCCACTTTGCCTTTCTCTCCACAGGTGTCCACTCCCAGGTCCAACTGCACCTCGGTTCTATCGATTGAATTCCACCATGGGATGGTCATGTATCATCCTTTTTCTAGTAGCAACTGCAACCGGTGTACATTCCCAGGTGCAGCTGCAGCAGTCTGGGGCTGAGGTGGTGAGGCCTGGGGTCTCAGTGAAGATTTCCTGCAAGGGTTCTGGCTACACATTCACTGATTATGCTATGCACTGGGTGAAGCAGAGTCATGCAAAGAGTCTAGAGTGGATTGGAGTTATTAGTACTTACTATGGTGATGCTAGCTACAACCAGAAGTTCAAGGGCAAGGCCACAATGACTGTAGACAAATCCTCCA…	Musmus IGKV5-48*01 F	Musmus IGKJ2*01 F	TCCACACATACGATTTAGGTGACACTATAGAATAACATCCACTTTGCCTTTCTCTCCACAGGTGTCCACTCCCAGGTCCAACTGCACCTCGGTTCTATCGATTGAATTCCACCATGGGATGGTCATGTATCATCCTTTTTCTAGTAGCAACTGCAACCGGTGTACATTCCGACATCTTGCTGACTCAGTCTCCAGCCATCCTGTCTGTGAGTCCAGGAGAAAGAGTCAGTTTCTCCTGCAGGGCCAGTCAGAGCATTGGCACAAGCATACACTGGTATCAGCAAAGAACAAATGGTTCTCCAAGGCTTCTCATAAAGTATGCTTCTGAGTCTATCTCTGGGATCCCTTCCAGGTTTAGTGGCAGTGGATCAGGGACAGATTTTACTCTTAGCATCAACA…
	2	E3	M	0.008	M82f2	Musmus IGHV1-18*01 F, or Musmus IGHV1-22*01 F or Musmus IGHV1-26*01 F	Musmus IGHJ2*01 F	Musmus IGHD2-10*01 F	ATCTACACATACGATTTAGGTGACACTATAGAATAACATCCACTTTGCCTTTCTCTCCACAGGTGTCCACTCCCAGGTCCAACTGCACCTCGGTTCTATCGATTGAATTCCACCATGGGATGGTCATGTATCATCCTTTTTCTAGTAGCAACTGCAACCGGTGTACATTCCGAGGTGCAGCTGCAGCAGTCTGGACCTGAGCTGGTGAAGCCTGGGGCTTCAGTGAAGATATCCTGCAAGACTTCTGGATACACATTCACTGAATACACCATGCACTGGGTGAAGCAGAGCCATGGAAAGAGCCTTGAGTGGATTGGAGGTATTAATCCTAACAATGGTGGTACTAGCTACAACCAGAAGTTCAAGGGCAAGGCCACATTGACTGTAGACAAGTCCTCC…	Musmus IGKV3-12*01 F	Musmus IGKJ1*01 F	AGATAGACACTATAGAATAACATCCACTTTGCCTTTCTCTCCACAGGTGTCCACTCCCAGGTCCAACTGCACCTCGGTTCTATCGATTGAATTCCACCATGGGATGGTCATGTATCATCCTTTTTCTAGTAGCAACTGCAACCGGTGTACATTCCGACATTGTGATGACTCAGTCTCCTGCTTCCTTAGCTGTATCTCTGGGGCAGAGGGCCACCATCTCATGCAGGGCCAGCAAAAGTGTCAGTACATCTGGCTATAGTTATATGCACTGGTACCAACAGAAACCAGGACAGCCACCCAAACTCCTCATCTATCTTGCATCCAACCTAGAATCTGGGGTCCCTGCCAGGTTCAGTGGCAGTGGGTCTGGGACAGACTTCACCCTCAACATCCATCCTG…
	2	F3	M	0.479	M82c3	Musmus IGHV5-9-3*01 F	Musmus IGHJ3*01 F	Musmus IGHD2-14*01 F	ATCTACACATACGATTTAGGTGACACTATAGAATAACATCCACTTTGCCTTTCTCTCCACAGGTGTCCACTCCCAGGTCCAACTGCACCTCGGTTCTATCGATTGAATTCCACCATGGGATGGTCATGTATCATCCTTTTTCTAGTAGCAACTGCAACCGGTGTACATTCCGAGGTGCAGCTGGTGGAGTCTGGGGGAGGCTTAGTGAAGCCTGGAGGGTCCCTGAAACTCTCCTGTGTAGCCTCTGGATTCACTTTCAGTAACTATGCCATGTCTTGGGTTCGCCAGACTCCGGAGAAGAGGCTGGAGTGGGTCGCAACCATTAGTGGTGGTGGTAGTTACACCTGCTATCCAGACAGTGTGAAGGGTCGATTCACCATCTCCAGAGACAATGCCAAG…	Musmus IGKV8-28*01 F	Musmus IGKJ2*01 F	AGAGAGTCACTATGACCTGCAAGTCCAGTCAGAGTCTGTTAAACAGTGGAAATCAAAAGAACTACTTGGCCTGGTACCAGCAGAAACCAGGGCAGCCTCCTAAACTGTTGATCTACGGGGCATCCACTAGGGAATCTGGGGTCCCTGATCGCTTCACAGGCAGTGGATCTGGAACCGATTTCACTCTTACCATCAGCAGTGTGCAGGCTGAAGACCTGGCAGTTTATTACTGTCAGAATGATCATAGTTATCCGTACACGTTCGGAGGGGGGACCAAGCTGGAAATAAAAC---------------------------------------------------
	2	G3	G1	-0.035	M82f3	Musmus IGHV1-9*01 F	Musmus IGHJ2*01 F	Musmus IGHD2-1*01 F	ATCTACACATACGATTTAGGTGACACTATAGAATAACATCCACTTTGCCTTTCTCTCCACAGGTGTCCACTCCCAGGTCCAACTGCACCTCGGTTCTATCGATTGAATTCCACCATGGGATGGTCATGTATCATCCTTTTTCTAGTAGCAACTGCAACCGGTGTACATTCCCAGGTGCAGCTGCAGCAGTCTGGAGCTGAACTGATGAAGCCTGGGGCCTCAGTGAAGATTTCCTGCAAGGCTAGTGGCTTCACATTCAGTAGCTACTGGATGGAGTGGGTAAAGCAGAGGCCTGGACATGGCCTTGAGTGGATTGGAGAGATTTTACCTGGAAGTGATAGTATTAACTCCAATGAGAAGTTCAAGGGAAAGGCCACATTCACTGCAGATACAACCTCC…	Musmus IGKV4-52*01 ORF, or Musmus IGKV4-54*01 ORF	Musmus IGKJ1*01 F	AGAACATATAGAATAACATCCACTTTGCCTTTCTCTCCACAGGTGTCCACTCCCAGGTCCAACTGCACCTCGGTTCTATCGATTGAATTCCACCATGGGATGGTCATGTATCATCCTTTTTCTAGTAGCAACTGCAACCGGTGTACATTCCCAAATTGTTCTCACCCAGTCTCCAGCAATCCTGTCTGCATCTCCAGGGGAGAAGGTCACCATGACCTGCAGTGCCAGCTCAAGTGTAAGTTCCATGTACAGGTACCAGCAGAAGCCAGGATCCTCACCCAAACCCTGGATTTATGGCACATCCAACCTGGCTTCTGGAGTCCCTGCTCGCTTCAGTGGCAGTGGATCTGGGACCTCTTATTCTCTCACAATCAGCAGCCTGGAGGCTGAAGATGCTGC…
	2	H3	G3	-0.022	M82g3	Musmus IGHV1-9*01 F	Musmus IGHJ1*01 F	Musmus IGHD3-1*01 F	ATCTACACATACGATTTAGGTGACACTATAGAATAACATCCACTTTGCCTTTCTCTCCACAGGTGTCCACTCCCAGGTCCAACTGCACCTCGGTTCTATCGATTGAATTCCACCATGGGATGGTCATGTATCATCCTTTTTCTAGTAGCAACTGCAACCGGTGTACATTCCCAGGTGCAGCTGCAGCAGTCTGGAGCTGAGGTGATGAAGCCTGGGGCCTCAGTGAAGATATCCTGCAAGGCTACTGGCTACACATTCAGTAGCTACTGGATAGAGTGGGTAAAACAGAGGCCTGGACATGGCCTTGAGTGGATTGGAGAGATTTTACCTGGAAGTGGTAGGACTGAGTATAATGTGAAGTTCAAGGGCAAGGCCACATTCACTGCAGATACATCCTCC…	Musmus IGKV3-5*01 F	Musmus IGKJ5*01 F	ACGACATTAGGTGACACTATAGAATAACATCCACTTTGCCTTTCTCTCCACAGGTGTCCACTCCCAGGTCCAACTGCACCTCGGTTCTATCGATTGAATTCCACCATGGGATGGTCATGTATCATCCTTTTTCTAGTAGCAACTGCAACCGGTGTACATTCCGACATTGTGCTGACCCAATCTCCAGCTTCTTTGGCTGTGTCTCTAGGGCAGAGGGCCACCATATCCTGCAGAGCCAGTGCAAGTGTTGATCGTTATGGCAGTCGTTTTATCCACTGGTACCAGCTGAAACCAGGACAGCCACCCAAACTCCTCATCTATCGTGCATCCAACCTAGAATCTGGGATCCCTGCCAGGTTCAGTGGCAATGGGTCTAGGACAGACTTCACCCTCACCATT…
E4 Boost day 7	1	A4	M	-0.005	F81HCf2	Musmus IGHV1-5*01 F	Musmus IGHJ2*01 F	Musmus IGHD1-2*01 F	ATCTACACATACGATTTAGGTGACACTATAGAATAACATCCACTTTGCCTTTCTCTCCACAGGTGTCCACTCCCAGGTCCAACTGCACCTCGGTTCTATCGATTGAATTCCACCATGGGATGGTCATGTATCATCCTTTTTCTAGTAGCAACTGCAACCGGTGTACATTCCGAGGTGCAGCTGCAGCAGTCTGGGACTGTGCTGGCAAGGCCTGGGGCTTCCGTGAAGATGTCCTGCAAGGCTTCTGGCTACAGCTTTACCAGCTACTGGATGCACTGGGTAAAACAGAGGCCTGGACAGGGTCTAGAATGGATTGGTGCTATTTATCCTGGAAATAGTGATACTAGTTACAACCAGAAGTTCAAGGGCAAGGCCAAACTGACTGCAGTCACATCCGCC…	Musmus IGKV17-127*01 F	Musmus IGKJ2*01 F	GCGTAGACACTATAGAATAACATCCACTTTGCCTTTCTCTCCACAGGTGTCCACTCCCAGGTCCAACTGCACCTCGGTTCTATCGATTGAATTCCACCATGGGATGGTCATGTATCATCCTTTTTCTAGTAGCAACTGCAACCGGTGTACATTCCGAAACAACTGTGACCCAGTCTCCAGCATCCCTGTCCGTGGCTACAGGAGAAAAAGTCACTATCAGATGCATAACCACCACTGATATTGATGATGATATGAACTGGTACCAGCAGAAGCCAGGGGAACCTCCTAAGCTCCTTATTTCAGAAGGCAATACTCTTCGTCCTGGAGTCCCATCCCGATTCTCCAGCAGTGGCTATGGCACAGATTTTGTTTTTACAATTGAAAACACGCTCTCAGAAG…
	1	B4	M	0.175	F81HCa3	Musmus IGHV1-4*01 F, or Musmus IGHV1S26*01 F	Musmus IGHJ3*01 F	Musmus IGHD1-2*01 F	TCTACACATACGATTTAGGTGACACTATAGAATAACATCCACTTTGCCTTTCTCTCCACAGGTGTCCACTCCCAGGTCCAACTGCACCTCGGTTCTATCGATTGAATTCCACCATGGGATGGTCATGTATCATCCTTTTTCTAGTAGCAACTGCAACCGGTGTACATTCCCAGGTGCAGCTGCAGCAGTCTGGGGCTGAACTGGCAAGACCTGGGGCCTCAGTGAAGATGTCCTGCAAGGCTTCTGGCTACACCTTTACTAACTACACGATGCACTGGGTAAAACAGAGGCCTGGACAGGGTCTGGAATGGATTGGATACATTAATCCTAGCAGTGCTTATACTAATTACAATCAGAAGTTCAAGGAAAAGGCCACATTGACTGCAGACAAATCCTCCA…	Musmus IGKV8-28*01 F	Musmus IGKJ4*01 F (see comment)	TCTACACATACGATTTAGGTGACACTATAGAATAACATCCACTTTGCCTTTCTCTCCACAGGTGTCCACTCCCAGGTCCAACTGCACCTCGGTTCTATCGATTGAATTCCACCATGGGATGGTCATGTATCATCCTTTTTCTAGTAGCAACTGCAACCGGTGTACATTCCGACATTGTGATGACTCAGTCTCCATCCTCCCTGAGTGTGTCAGCAGGAGAGAAGGTCACTATGAGCTGCAAGTCCAGTCAGAGTCTGTTAAACAGTGGAAATCAAAAGAACTACTTGGCCTGGTACCAGCAGAAACCAGGGCAGCCTCCTAAACTGTTGATCTACGGGGCATCCACTAGGGAATCTGGGGTCCCTGATCGCTTCACAGGCAGTGGATCTGGAACCGATT…
	1	C4	M	0.05	F81HCe3	Musmus IGHV3-2*02 F	Musmus IGHJ4*01 F	Musmus IGHD2-4*01 F	TCTACACATACGATTTAGGTGACACTATAGAATAACATCCACTTTGCCTTTCTCTCCACAGGTGTCCACTCCCAGGTCCAACTGCACCTCGGTTCTATCGATTGAATTCCACCATGGGATGGTCATGTATCATCCTTTTTCTAGTAGCAACTGCAACCGGTGTACATTCCGATGTGCAGCTTCAGGAGTCGGGACCTGGCCTGGTGAAACCTTCTCAGTCTCTGTCCCTCACCTGCACTGTCACTGGCTACTCAATCACCAGTGATTATGCCTGGAACTGGATCCGGCAGTTTCCAGGAAACAAACTGGAGTGGATGGGCTACATAAGCTACAGTGGTAGCACTAGCTACAACCCATCTCTCAAAAGTCGAATCTCTATCACTCGAGACACATCCAAGA…	Musmus IGKV17-121*01 F	Musmus IGKJ2*01 F	ACGATATTAGGTGACACTATAGAATAACATCCACTTTGCCTTTCTCTCCACAGGTGTCCACTCCCAGGTCCAACTGCACCTCGGTTCTATCGATTGAATTCCACCATGGGATGGTCATGTATCATCCTTTTTCTAGTAGCAACTGCAACCGGTGTACATTCCGAAACAACTGTGACCCAGTCTCCAGCATCCCTGTCCATGGCTATAAGAGAAAAAGTCACCATCAGATGCATAACCAGCACTGATATTGATGATGATATGAACTGGTACCAGCAGAAGCCAGGGGAACCTCCTAAGCTCCTTATTTCAGAAGGCAATACTCTTCGTCCTGGAGTCCCATCCCGATTCTCCAGCAGTGGCTATGGTACAGATTTTGTTTTTACAATTGAAAACATGCTC…
	1	D4	G1	-0.054	F81HCa4	Musmus IGHV2-3*01 F	Musmus IGHJ1*01 F	Musmus IGHD6-3*01 F	TCTACACATACGATTTAGGTGACACTATAGAATAACATCCACTTTGCCTTTCTCTCCACAGGTGTCCACTCCCAGGTCCAACTGCACCTCGGTTCTATCGATTGAATTCCACCATGGGATGGTCATGTATCATCCTTTTTCTAGTAGCAACTGCAACCGGTGTACATTCCCAGATGCAGCTTCAGGAGTCAGGACCTGGCCTGGTGGCGCCCTCACAGAGCCTGTCCATCACATGCACTGTCTCAGGGTTCTCATTAACCAGCTATGGTGTAAGCTGGGTTCGCCAGCCTCCAGGAAAGGGTCTGGAGTGGCTGGGAGTAATATGGGGTGACGGGAGCACAAATTATCATTCAGCTCTCATATCCAGACTGAGCATCAGCAAGGATAACTCCGAGAGCC…	Musmus IGKV14-111*01 F	Musmus IGKJ1*01 F	TCTACACATACGATTTAGGTGACACTATAGAATAACATCCACTTTGCCTTTCTCTCCACAGGTGTCCACTCCCAGGTCCAACTGCACCTCGGTTCTATCGATTGAATTCCACCATGGGATGGTCATGTATCATCCTTTTTCTAGTAGCAACTGCAACCGGTGTACATTCCGACATCAAGATGACCCAGTCTCCATCTTCCATGTATGCATCTCTAGGAGAGAGAGTCACTATCACTTGCAAGGCGAGTCAGGACATTAATAGCTATTTAAGCTGGTTCCAGCAGAAACCAGGGAAATCTCCTAAGACCCTGATCTATCGTGCAAACAGATTGGTAGATGGGGTCCCATCAAGGTTCAGTGGCAGTGGATCTGGGCAAGATTATTCTCTCACCATCAGCA…
	1	E4	M	-0.026	F81HCc4	Musmus IGHV1S56*01 F	Musmus IGHJ2*01 F		ATCTACACATACGATTTAGGTGACACTATAGAATAACATCCACTTTGCCTTTCTCTCCACAGGTGTCCACTCCCAGGTCCAACTGCACCTCGGTTCTATCGATTGAATTCCACCATGGGATGGTCATGTATCATCCTTTTTCTAGTAGCAACTGCAACCGGTGTACATTCCCAGGTGCAGCTGCAGCAGTCTGGACCTGAGCTGGTGAAGCCTGGGGCTTCAGTGAGAATATCCTGCAAGGCTTCTGGCTACACCTTCACAAGCTACTATATACACTGGGTGAAGCAGAGGCCTGGACAGGGACTTGAGTGGATTGGATGGATTTATCCTGGAAATGTTAATACTAAGTACAATGAGAAGTTCAAGGGCAAGGCCACACTGACTGCAGACAAATCCTCC…	Musmus IGKV17-121*01 F	Musmus IGKJ2*03 F, or Musmus IGKJ4*01 F	CGACATTAGGTGACACTATAGAATAACATCCACTTTGCCTTTCTCTCCACAGGTGTCCACTCCCAGGTCCAACTGCACCTCGGTTCTATCGATTGAATTCCACCATGGGATGGTCATGTATCATCCTTTTTCTAGTAGCAACTGCAACCGGTGTACATTCCGAAACAACTGTGACCCAGTCTCCAGCATCCCTGTCCATGGCTATAGGAGAAAAAGTCACCATCAGATGCATAACCAGCACTGATATTGATGATGATATGAACTGGTACCAGCAGAAGCCAGGGGAACCTCCTAACCTCCTTATTTCAGAAGGCAATACTCTTCGTCCTGGAGTCCCATCCCGATTCTCCAGCAGTGGCTATGGTACAGATTTTGTTTTTACAATTGAAAACATGCTCT…
	1	F4	G2A	0.026	F81HCe4	Musmus IGHV1-26*01 F	Musmus IGHJ3*01 F	Musmus IGHD5-1*01 P	TCTACACATACGATTTAGGTGACACTATAGAATAACATCCACTTTGCCTTTCTCTCCACAGGTGTCCACTCCCAGGTCCAACTGCACCTCGGTTCTATCGATTGAATTCCACCATGGGATGGTCATGTATCATCCTTTTTCTAGTAGCAACTGCAACCGGTGTACATTCCGAGGTGCAGCTGCAGCAGTCTGGACCTGAGCTGGTGAAGCCTGGGGCTTCAGTGAAGATATCCTGCAAGGCTTCTGGTTACTCATTCACTGACTACTACATGCACTGGGTGAAGCAAAGCCATGTAAAGAGCCTTGAGTGGATTGGACGTATTAATCCTTACAGTGGTGCTACTACCTACCACCAGAATTTCAAGGACAAGGCCAGCTTGACTGTAGATAAGTCGTCCA…	Musmus IGKV3-5*01 F	Musmus IGKJ1*01 F	GCATTTAGGTGACACTATAGAATAACATCCACTTTGCCTTTCTCTCCACAGGTGTCCACTCCCAGGTCCAACTGCACCTCGGTTCTATCGATTGAATTCCACCATGGGATGGTCATGTATCATCCTTTTTCTAGTAGCAACTGCAACCGGTGTACATTCCGACATTGTGCTGACCCAATCTCCAGTTTCTTTGGCTGTGTCTCTAGGACAGAGGGCCACCATATCCTGCAGAGCCAGTGAAAGTGTTGATAGTTATGGCAATAGTTTTATGCACTGGTACCAGCAGAAACCAGGACAGCCACCCAAACTCCTCACATCTCGTGCATCCAACCTAGAATCTGGGATCCCTGCCAGGTTCAGTGGCAGTGGGTCTGGGACAGACTTCACCCTCAGTATTAA…
	1	G4	M	-0.018	F81HCf5	Musmus IGHV5-4*02 F	Musmus IGHJ2*01 F	Musmus IGHD4-1*01 F	TCTACACATACGATTTAGGTGACACTATAGAATAACATCCACTTTGCCTTTCTCTCCACAGGTGTCCACTCCCAGGTCCAACTGCACCTCGGTTCTATCGATTGAATTCCACCATGGGATGGTCATGTATCATCCTTTTTCTAGTAGCAACTGCAACCGGTGTACATTCCGAGGTGCAGCTGGTGGAGTCTGGGGGAGGCTTAGTGAAGCCTGGAGGGTCCCTGAAACTCTCCTGTGCAGCCTCTGGATTCACTTTCAGTGACTATTACATGTATTGGGTTCGCCAGACTCCGGAAAAGAGGCTGGAGTGGGTCGCAACCATTAGTGATGGTGGTAGTTACACCTACTATCCAGACAGTGTGAAGGGGCGATTCACCATCTCCAGAGACAATGCCAAGA…	Musmus IGKV10-96*01 F, or Musspr IGKV10-96*01 F	Musmus IGKJ1*01 F	TCAGTAATAACATCCACTTTGCCTTTCTCTCCACAGGTGTCCACTCCCAGGTCCAACTGCACCTCGGTTCTATCGATTGAATTCCACCATGGGATGGTCATGTATCATCCTTTTTCTAGTAGCAACTGCAACCGGTGTACATTCCGATATCCAGATGACACAGACTACATCCTCCCTGTCTGCCTCTCTGGGAGACAGAGTCACCATCAGTTGCAGGGCAAGTCTGGACATTAGTAATTATTTAAACTGGTATCAGCAGAAACCAGATGGAACTGTTAAACTCCTGATCTACTATACATCAAGATTACACTCAGGAGTCCCATCAAGGTTCAGTGGCAGTGGGTCTGGAACAGATTATTCTCTCACCATTAGCGACCTGGAACAAGAAGATATTGCCAC…
	1	H4	M	0.044	F81HCb6	Musmus IGHV1-80*01 F	Musmus IGHJ2*01 F	Musmus IGHD1-2*01 F	ATCTACACATACGATTTAGGTGACACTATAGAATAACATCCACTTTGCCTTTCTCTCCACAGGTGTCCACTCCCAGGTCCAACTGCACCTCGGTTCTATCGATTGAATTCCACCATGGGATGGTCATGTATCATCCTTTTTCTAGTAGCAACTGCAACCGGTGTACATTCCCAGGTGCAGCTGCAGCAGTCTGGGGCTGAGCTGGTGAGGCCTGGGTCCTCAGTGAAGATTTCCTGCAAGGCTTCTGGCTATACATTCAGTAGCTACTGGATGAACTGGATGAAGCAGAGGCCTGGACAGGGTCTTGAGTGGATTGGACAGATTTATCCTGGAGATGGTGATACTAACTACAATGGAAAGTTCAAGGGTAAAGCCACACTGACTGCAGACAAATCCTCC…	Musmus IGKV10-96*01 F, or Musspr IGKV10-96*01 F	Musmus IGKJ1*01 F	TACGATTTAGGTGACACTATAGAATAACATCCACTTTAGCCTTTCTCTCCACAGGTGTCCACTCCCAGGTCCAACTGCACCTCGGTTCTATCGATTGAATTCCACCATGGGATGGTCATGTATCATCCTTTTTCTAGTAGCAACTGCAACCGGTGTACATTCCGATATCCAGATGACACAGACTACATCCTCCCTGTCTGCCTCTCTGGGAGACAGAGTCACCATCAGTTGCAGGGCAAGTCAGGACATTAGCAATTATTTAAACTGGTATCAGCAGAAACCAGATGGAACTGTTAAACTCCTGATCTACTACACATCAAGATTACACTCAGGAGTCCCATCAAGGTTCAGTGGCAGTGGGTCTGGAACAGATTATTCTCTCACCATTAGCAACCTGGA…
	1	A5	M	0.147	F81HCe6	Musmus IGHV1-85*01 F, or Musmus IGHV1S56*01 F	Musmus IGHJ3*01 F	Musmus IGHD4-1*01 F	TCTACACATACGATTTAGGTGACACTATAGAATAACATCCACTTTGCCTTTCTCTCCACAGGTGTCCACTCCCAGGTCCAACTGCACCTCGGTTCTATCGATTGAATTCCACCATGGGATGGTCATGTATCATCCTTTTTCTAGTAGCAACTGCAACCGGTGTACATTCCCAGATCCAGCTGCAGCAGTCTGGAGCTGAACTGGTAAAGCCTGGGACTTCAGTGAAGTTGTCCTGCAAGGCTTCTGGCTACACCTTCACAAGCTATGATATAAACTGGGTGAGGCAGAGGCCTGAACAGGGACTTGAGTGGATTGGATGGATTTTTCCTGGAGATGGTAGTACTAAGTACAATGAGAAGTTCAAGGGCAAGGCCACACTGACTACAGACAAATCCTCCA…	Musmus IGKV14-111*01 F	Musmus IGKJ2*01 F	TACGCATATTAGGTGACACTATAGAATAACATCCACTTTGCCTTTCTCTCCACAGGTGTCCACTCCCAGGTCCAACTGCACCTCGGTTCTATCGATTGAATTCCACCATGGGATGGTCATGTATCATCCTTTTTCTAGTAGCAACTGCAACCGGTGTACATTCCGACATCAAGATGACCCAGTCTCCATCTTCCATGTATGCATCTCTAGGAGAGAGAGTCACTATCACTTGCAAGGCGAGTCAGGACATTAATAGCTATTTAAGTTGGTTCCAGCAGAAACCAGGGAAATCTCCTAAGACCCTGATCTATCGTGCAAACAGATTGGTAGATGGGGTCCCATCAAGGTTCAGTGGCAGTGGATCTGGGCAAGATTGTTCTCTCACCATCAGCAGCCTGG…
	2	B5	M	1.457	F82HCb1	Musmus IGHV1-37*01 F	Musmus IGHJ4*01 F	Musmus IGHD1-3*01 F	TCTACACATACGATTTAGGTGACACTATAGAATAACATCCACTTTGCCTTTCTCTCCACAGGTGTCCACTCCCAGGTCCAACTGCACCTCGGTTCTATCGATTGAATTCCACCATGGGATGGTCATGTATCATCCTTTTTCTAGTAGCAACTGCAACCGGTGTACATTCCGAGGTGCAGCTGCAGCAGTCTGGACCTGAGCTGGTGAAGCCTGGGGCTTCAGTGAAGATATCCTGCAAGGCTTCTGGTTACTCATTTACTGGCTACTTTATGAACTGGGTGAAGCAGAGCCATGGAAAGAGCCTTGAGTGGATTGGACGTATTAATCCTTACAATGGTGATACTTTCTACAACCAGAAGTTCAAGGGCAAGGCCACATTGACTGTAGACAAATCCTCTA…	Musmus IGKV9-120*01 F	Musmus IGKJ1*01 F	GCACGTCCACTCCCAGGTCCAACTGCACCTCGGTTCTATCGATTGAATTCCACCATGGGATGGTCATGTATCATCCTTTTTCTAGTAGCAACTGCAACCGGTGTACATTCCGACATCCAGATGACCCAGTCTCCATCCTCCTTATCTGCCTCTCTGGGAGAAAGAGTCAGTCTCACTTGTCGGGCAAGTCAGGACATTGGTAGTAGCTTAAACTGGCTTCAGCAGGATCCAGATGGAACTATTAAACGCCTGATCTACGCCACATCCAGTTTAGATTCTGGTGTCCCCAAAAGGTTCAGTGGCAGTAGGTCTGGGTCAGATTATTCTCTCACCATCAGCAGCCTTGAGTCTGAAGATTTTGTAGACTATTACTGTCTACAATATGGTAGTTCTCCGTGG…
	2	C5	M	0.417	F82HCh1	Musmus IGHV1-37*01 F	Musmus IGHJ2*01 F	Musmus IGHD1-1*01 F	TCTACACATACGATTTAGGTGACACTATAGAATAACATCCACTTTGCCTTTCTCTCCACAGGTGTCCACTCCCAGGTCCAACTGCACCTCGGTTCTATCGATTGAATTCCACCATGGGATGGTCATGTATCATCCTTTTTCTAGTAGCAACTGCAACCGGTGTACATTCCGAGGTGCAGCTGCAGCAGTCTGGACCTGAGCTGGTGAAGCCTGGGGCTTCAGTGAAGATATCCTGCAAGGCTTCTGGTTACTCATTTACTGGCTACTTTATGAACTGGGTGAAGCAGAGCCATGGAAAGAGCCTTGAGTGGATTGGACGTATTAATCCTTACAATGGTGATACTTTCTACAACCAGAAGTTCAAGGGCAAGGCCACATTGACTGTAGACAAATCCTCCA…	Musmus IGKV8-27*01 F	Musmus IGKJ2*01 F	CACATTAGGTGACACTATAGAATAACATCCACTTTGCCTTTCTCTCCACAGGTGTCCACTCCCAGGTCCAACTGCACCTCGGTTCTATCGATTGAATTCCACCATGGGATGGTCATGTATCATCCTTTTTCTAGTAGCAACTGCAACCGGTGTACATTCCAACATTATGATGACACAGTCGCCATCATCTCTGGCTGTGTCTGCAGGAGAAAAGGTCACTATGAGCTGTAAGTCCAGTCAAAGTGTTTTATACAGTTCAAATCAGAAGAACTACTTGGCCTGGTACCAGCAGAAACCAGGGCAGTCTCCTAAACTACTGATCTACTGGGCATCCACTAGGGAATCTGGTGTCCCTGATCGCTTCACAGGCAGTGGATCTGGGACAGATTTTACTCTTAC…
	2	D5	M	-0.035	F82HCa2	Musmus IGHV1-39*01 F	Musmus IGHJ2*01 F	Musmus IGHD2-4*01 F	ATCTACACATACGATTTAGGTGACACTATAGAATAACATCCACTTTGCCTTTCTCTCCACAGGTGTCCACTCCCAGGTCCAACTGCACCTCGGTTCTATCGATTGAATTCCACCATGGGATGGTCATGTATCATCCTTTTTCTAGTAGCAACTGCAACCGGTGTACATTCCGAGTTCCAGCTGCAGCAGTCTGGACCTGAGCTGGAGAAGCCTGGCGCTTCAGTGAAGATATCCTGCAAGGCTTCTGGTTACTCATTCACTGGCTACAACATGAACTGGGTGAAGCAGAGCAATGGAAAGAGCCTTGAGTGGATTGGAAATATTGATCCTTACTATGGTAATACTAACTACAACCAGAAGTTCAAGGGCAAGGCCACATTGACTGTAGACAAATCCTCC…	Musmus IGKV4-90*01 F	Musmus IGKJ2*01 F	TACGATATTAGGTAGACACTATAGAATAACATCCACTTTGCCTTTCTCTCCACAGGTGTCCACTCCCAGGTCCAACTGCACCTCGGTTCTATCGATTGAATTCCACCATGGGATGGTCATGTATCATCCTTTTTCTAGTAGCAACTGCAACCGGTGTACATTCCGAAAATGTTCTCACCCAGTCTCCAGCAATCATAGCTGCATCTCCTGGGGAGAAGGTCACCATCACCTGCAGTGCCAGTTCAAGTGTAAGTTACATGAACTGGTACCAGCAGAAACCAGGATCCTCCCCCAAAAGATGGATTTATGGTATATCCAACCTGGCTTCTGGAGTTCCTGCTCGCTTCAGTGGCAGTGGGTCTGGGACATCTTTCTCTTTCACAATCAACAGCATGGAGG…
	2	E5	M	-0.045	F82HCb2	Musmus IGHV2-6-4*01 F	Musmus IGHJ2*01 F	Musmus IGHD2-2*01 F	ATCTACACATACGATTTAGGTGACACTATAGAATAACATCCACTTTGCCTTTCTCTCCACAGGTGTCCACTCCCAGGTCCAACTGCACCTCGGTTCTATCGATTGAATTCCACCATGGGATGGTCATGTATCATCCTTTTTCTAGTAGCAACTGCAACCGGTGTACATTCCCAGATGCAGCTTCAGGAGTCAGGACCTGGCCTGGTGGCACCCTCACAGAGCCTGTCCATCACATGCACTGTCTCTGGGTTCTCATTATCCAGATATAGTGTACACTGGGTTCGCCAGCCTCCAGGAAAGGGTCTGGAGTGGCTGGGAATGATATGGGGTGGTGGAAGCACAGACTATAATTCAGCTCTCAAATCCAGACTGAGCATCACCAAGGACAACTCCAAGAGC…	Musmus IGKV8-28*01 F	Musmus IGKJ2*01 F, or Musmus IGKJ5*01 F (see comment)	GCACATTAGGTGACACTATAGAATAACATCCACTTTGCCTTTCTCTCCACAGGTGTCCACTCCCAGGTCCAACTGCACCTCGGTTCTATCGATTGAATTCCACCATGGGATGGTCATGTATCATCCTTTTTCTAGTAGCAACTGCAACCGGTGTACATTCCGACATTGTGATGACTCAGTCTCCATCCTCCCTGAGTGTGTCAGCAGGAGAGAAGGTCACTATGAGCTGCAAGTCCAGTCAGAGTCTGTTAAACAGTGGAAATCAAAAGAACTACTTGGCCTGGTACCAGCAGAAACCAGGGCAGCCTCCTAAACTGTTGATCTACGGGGCATCCACTAGGGAATCTGGGGTCCCTGATCGCTTCACAGGCAGTGGATCTGGAACCGATTTCACTCTTA…
	2	F5	M	0.337	F82HCc2	Musmus IGHV1-9*01 F	Musmus IGHJ4*01 F	Musmus IGHD1-1*01 F	TCTACACATACGATTTAGGTGACACTATAGAATAACATCCACTTTGCCTTTCTCTCCACAGGTGTCCACTCCCAGGTCCAACTGCACCTCGGTTCTATCGATTGAATTCCACCATGGGATGGTCATGTATCATCCTTTTTCTAGTAGCAACTGCAACCGGTGTACATTCCCAGGTGCAGCTGCAGCAGTCTGGAGCTGAGCTGATGAAGCCTGGGGCCTCAGTGAAGATATCCTGCAAGGCTACTGGCTACACATTCAGTAGCTACTGGATAGAGTGGGTAAAGCAGAGGCCTGGACATGGCCTTGAGTGGATTGGAGAGATTTTACCTGGAAGTGGTAGTACTAACTACAATGAGAAGTTCAAGGGCAAGGCCACATTCACTGCAGATACATCCTCCA…	Musmus IGKV4-59*01 F	Musmus IGKJ2*01 F, or Musmus IGKJ2*03 F or Musmus IGKJ5*01 F (see comment)	TAGACACATATAGAATAACATCCACTTTGCCTTTCTCTCCACAGGTGTCCACTCCCAGGTCCAACTGCACCTCGGTTCTATCGATTGAATTCCACCATGGGATGGTCATGTATCATCCTTTTTCTAGTAGCAACTGCAACCGGTGTACATTCCCAAATTGTTCTCACCCAGTCTCCAGTAATCATGTCTGCATCTCCAGGGGAGAAGGTCACCATGACCTGCAGTGCCAGCTCAAGTGTAAGTTACATGCACTGGTACCAGCAGAAGTCAGGCACCTCCCCCAAAAGATGGATTTATGACACATCCAAACTGGCTTCTGGAGTCCCTGCTCGCTTCAGTGGCAGTGGGTCTGGGACCTCTTACTCTCTCACAATCAGCAGCATGGAGGCTGAAGATGCT…
	2	G5	M	-0.055	F82HCc3	Musmus IGHV5-12-2*01 F, or Musmus IGHV5-12-2*02 F	Musmus IGHJ2*01 F	Musmus IGHD2-3*01 F	ATCTACACATACGATTTAGGTGACACTATAGAATAACATCCACTTTGCCTTTCTCTCCACAGGTGTCCACTCCCAGGTCCAACTGCACCTCGGTTCTATCGATTGAATTCCACCATGGGATGGTCATGTATCATCCTTTTTCTAGTAGCAACTGCAACCGGTGTACATTCCGAGGTGCAGCTGGTGGAGTCTGGGGGAGGTTTAGTGCAGCCTGGAGGGTCCCTGAAACTCTCCTGTGCAGCCTCTGGATTCACTTTCAGTAGCTATACCATGTCTTGGGTTCGCCAGACTCCAGAGAAGAGGCTGGAGTGGGTCGCATACATTAGTCATGGTGGTGGTAGCACCTACTATCCAGACACTGTAAAGGGCCGATTCACCATCTCCAGAGACAATGCCAAG…	Musmus IGKV5-48*01 F	Musmus IGKJ5*01 F	TTTAGGTGACACTATAGAATAACATCCACTTTGCCTTTCTCTCCACAGGTGTCCACTCCCAGGTCCAACTGCACCTCGGTTCTATCGATTGAATTCCACCATGGGATGGTCATGTATCATCCTTTTTCTAGTAGCAACTGCAACCGGTGTACATTCCGACATCTTGCTGACTCAGTCTCCAGCCATCCTGTCTGTGAGTCCAGGAGAAAGAGTCAGTTTCTCCTGCAGGGCCAGTCAGAGCATTGGCACAAGCATACACTGGTATCAGCAAAGAACAAATGGTTCTCCAAGGCTTCTCATAAAGTATGCTTCTGAGTCTATCTCTGGGATCCCTTCCAGGTTTAGTGGCAGTGGATCAGGGACAGATTTTACTCTTAGCATCAACAGTGTGGAGTCTGA…
	2	H5	M	-0.009	F82HCd3	Musmus IGHV2-9*02 F	Musmus IGHJ2*01 F	Musmus IGHD1-1*01 F	ATCTACACATACGATTTAGGTGACACTATAGAATAACATCCACTTTGCCTTTCTCTCCACAGGTGTCCACTCCCAGGTCCAACTGCACCTCGGTTCTATCGATTGAATTCCACCATGGGATGGTCATGTATCATCCTTTTTCTAGTAGCAACTGCAACCGGTGTACATTCCGATGTACAGCTTCAGGAGTCAGGACCTGGCCTGGTGGCGCCCTCACAGAGCCTGTCCATCACTTGCACTGTCTCTGGGTTTTCATTAACCAGCTATGGTGTACACTGGGTTCGCCAGCCTCCAGGAAAGGGTCTGGAGTGGCTGGGAGTAATATGGGCTGGTGGAAGCACAAATTATAATTCGGCTCTCATGTCCAGACTGAGCATCAGCAAAGACAACTCCAAGAGC…	Musmus IGKV5-43*01 F	Musmus IGKJ5*01 F	TCTACACATACGATTTAGGTGACACTATAGAATAACATCCACTTTGCCTTTCTCTCCACAGGTGTCCACTCCCAGGTCCAACTGCACCTCGGTTCTATCGATTGAATTCCACCATGGGATGGTCATGTATCATCCTTTTTCTAGTAGCAACTGCAACCGGTGTACATTCCGACATTGTGCTCACCCAATCTCCAGCCACCCTGTCTGTGACTCCAGGAGATAGCGTCCGTCTTTCCTGCAGGGCCAGCCAAAGTATTAGCAACAACCTACACTGGTATCAACAAAAATCACATGAGTCTCCAAGGCTTCTCATCAAGTATGCTTCCCAGTCCATCTCTGGGATCCCCTCCAGGTTCAGTGGCAGTGGATCAGGGACAGATTTCACTCTCAGTATCAACA…
	2	A6	G2B	-0.014	F82HCe4	Musmus IGHV5-17*02 F	Musmus IGHJ2*01 F	Musmus IGHD1-1*01 F	ATCTACACATACGATTTAGGTGACACTATAGAATAACATCCACTTTGCCTTTCTCTCCACAGGTGTCCACTCCCAGGTCCAACTGCACCTCGGTTCTATCGATTGAATTCCACCATGGGATGGTCATGTATCATCCTTTTTCTAGTAGCAACTGCAACCGGTGTACATTCCGAGGTGCAGCTGGTGGAGTCTGGGGGAGGCTTAGTGCAGCCTGGAGGGTCCCGGACACTCTCCTGTGCAGCCTCTGGATTCACTTTCAGTAGCTTTGGAATGCACTGGGTTCGTCAGGCTCCAGAGAAGGGGCTGGAGTGGGTCGCATACATTAGTAGTGGCAGTAGTACCATCTACTATACAGACACAGTGAAGGGCCGATTCACCCTCTCCAGAGACAATCCCAAG…	Musmus IGKV9-124*01 F	Musmus IGKJ1*01 F	ACAGACACATATAGAATAACATCCACTTTGCCTTTCTCTCCACAGGTGTCCACTCCCAGGTCCAACTGCACCTCGGTTCTATCGATTGAATTCCACCATGGGATGGTCATGTATCATCCTTTTTCTAGTAGCAACTGCAACCGGTGTACATTCCGACATCCAGATGACCCAGTCTCCATCCTCCTTATCTGCCTCTCTGGGAGAGAAAGTCAGTCTCACTTGTCGGGCAAGTCAGGAAATTGGTGTTTACTTAAACTGGCTTCAGCAGAGACCAGATGGAACTATTAAACGCCTGATCTACGCCGCATCCACTTTAGATTCTGGTGTCCCAAAAAGGTTCAGTGGCAGTAGGTCTGGGTCAGATTATTCTCTCACCGTCAGCAGCCTTGAGTCTGAAGA…
	2	B6	M	0.47	F82HCa5	Musmus IGHV1-87*01 F	Musmus IGHJ4*01 F	Musmus IGHD2-1*01 F	ATCTACACATACGATTTAGGTGACACTATAGAATAACATCCACTTTGCCTTTCTCTCCACAGGTGTCCACTCCCAGGTCCAACTGCACCTCGGTTCTATCGATTGAATTCCACCATGGGATGGTCATGTATCATCCTTTTTCTAGTAGCAACTGCAACCGGTGTACATTCCCAGGTGCAGCTGCAGCAGTCTGGGGCTGAGCTGGCAAGACCTGGGGCTTCAATGAAGTTGTCCTGCAAGGCTTCTGGCTACACCTTTACTAGCTACTGGATGCAGTGGGTAAAACAGAGGCCTGGACAGGGTCTGGAATGGATTGGGACTATTTATCCTGGAAATGGTGATACTAGGTACACTCAGAAGTTCAAGGACAAGGCCACATTGACTGCAGATAAATCCTCC…	Musmus IGKV8-30*01 F	Musmus IGKJ2*01 F, or Musmus IGKJ3*01 ORF or Musmus IGKJ5*01 F	GGATGGTCATGTATCATCCTTTTTCTAGTAGCAACTGCAACCGGTGTACATTCCGACATTGTGATGTCACAGTCTCCATCCTCCCTAGTTGTGTCAGTTGGAGAGAAGGTTACTATGAGCTGCAAGTCCAGTCAGAGCCTTTTATATAGTAGCAATCAAAAGAACTACTTGGCCTGGTACCAGCAGAAACCAGGGCAGTCTCCTAAACTGCTGATTTACTGGGCATCCACTAGGGAATCTGGGGTCCCTGATCGCTTCACAGGCAGTGGATCTGGGACAGATTTCACTCTCACCATCAGCAGTGTGAAGGCTGAAGACCTGGCAGTCTATTACTGTCAGCAATATTATAGCTATCCTCTCACGTTCGGTGATGGGACCAAGCTGGAAATAAAACGTACG…
	2	C6	M	-0.046	F82HCc6	Musmus IGHV14-3*02 F	Musmus IGHJ4*01 F	Musmus IGHD2-4*01 F	TCTACACATACGATTTAGGTGACACTATAGAATAACATCCACTTTGCCTTTCTCTCCACAGGTGTCCACTCCCAGGTCCAACTGCACCTCGGTTCTATCGATTGAATTCCACCATGGGATGGTCATGTATCATCCTTTTTCTAGTAGCAACTGCAACCGGTGTACATTCCGAGGTGCAGCTGCAGCAGTCTGGGGCAGAGCTTGTGAAGCCAGGGGCCTCAGTCAAGTTGTCCTGCACAGCTTCTGGCTTCAACATTAAAGACACCTATATGCACTGGGTGAAGCAGAGGCCTGAACAGGGCCTGGAGTGGATTGGAAGGATTGATCCTGCGAATGGTAATTCTAAATATGACCCGAACTTCCAGGTCAAGGCCACTATAACAGCAGACACATCCTCCA…	Musmus IGKV12-46*01 F	Musmus IGKJ2*01 F	ATACGATATTAGGTGACACTATAGAATAACATCCACTTTGCCTTTCTCTCCACAGGTGTCCACTCCCAGGTCCAACTGCACCTCGGTTCTATCGATTGAATTCCACCATGGGATGGTCATGTATCATCCTTTTTCTAGTAGCAACTGCAACCGGTGTACATTCCGACATCCAGATGACTCAGTCTCCAGCCTCCCTATCTGTATCTGTGGGAGAAATTGTCACCATCACATGTCGAGCAAGTGAGAATATTTACAGTAATTTAGCATGGTATCAGCAGAAACAGGGCAAATCTCCTCAGCTCCTGGTCTATGCTGCAACAAACTTAGCAGATGGTGTGCCATCAAGGTTCAGTGGCAGTGGATCAGGCACACAGTATTCCCTCAAGATCAACAGCCTGC…
	3	D6	M	0.319	F83HCd2	Musmus IGHV1-20*02 F	Musmus IGHJ3*01 F	Musmus IGHD1-1*01 F	ATCTACACATACGATTTAGGTGACACTATAGAATAACATCCACTTTGCCTTTCTCTCCACAGGTGTCCACTCCCAGGTCCAACTGCACCTCGGTTCTATCGATTGAATTCCACCATGGGATGGTCATGTATCATCCTTTTTCTAGTAGCAACTGCAACCGGTGTACATTCCGAGGTGCAGCTGCAGCAGTCTGGACCTGAGCTGGTGAAGCCTGGGGCTTCAGTGAAGATATCCTGCAAGGCTTCTGGTTACTCATTTACTGGCTACTTTATGAACTGGGTGATGCAGAGCCATGGAAAGAGCCTTGAGTGGATTGGACGTATTAATCCTTACAATGCTGATACTTTCTACAACCAGAAGTTCAAGGGCAAGGCCACATTGACTGTAGACAAATCCTCT…	Musmus IGKV14-100*01 F	Musmus IGKJ2*01 F	TCTACACATACGATATTAGGTGACACTATAGAATAACATCCACTTTGCCTTTCTCTCCACAGGTGTCCACTCCCAGGTCCAACTGCACCTCGGTTCTATCGATTGAATTCCACCATGGGATGGTCATGTATCATCCTTTTTCTAGTAGCAACTGCAACCGGTGTACATTCCGACATCCTGATGACCCAATCTCCATCCTCCATGTCTGTATCTCTGGGAGACACAGTCAGCATCACTTGCCATGCAAGTCAGGGCATTAGCAGTAATATAGGGTGGTTGCAGCAGAAACCAGGGAAATCATTTAAGGGCCTGATCTATCATGGAACCAACTTGGAAGATGGAGTTCCATCGAGGTTCAGTGGCAGTGGATCTGGAGCAGATTATTCTCTCACCATCAGC…
	3	E6	M	0.03	F83HCe3	Musmus IGHV2-9*02 F	Musmus IGHJ2*01 F		TCTACACATACGATTTAGGTGACACTATAGAATAACATCCACTTTGCCTTTCTCTCCACAGGTGTCCACTCCCAGGTCCAACTGCACCTCGGTTCTATCGATTGAATTCCACCATGGGATGGTCATGTATCATCCTTTTTCTAGTAGCAACTGCAACCGGTGTACATTCCGATGTACAGCTTCAGGAGTCAGGACCTGGCCTGGTGGCGCCCTCACAGAGCCTGTCCATCACTTGCACTGTCTCTGGGTTTTCATTAACCAGCTATGGTGTACACTGGGTTCGCCAGCCTCCAGGAAAGGGTCTGGAGTGGCTGGGAGTAATATGGGCTGGTGGAAGCACAAATTGTAATTCGGCTCTCATGTCCAGACTGAGCATCAGCAAAGACAACTCCAAGAGCC…	Musmus IGKV10-96*01 F	Musmus IGKJ1*01 F	ACCTACGATTTAGGTGACACTATAGAATAACATCCACTTTGCCTTTCTCTCCACAGGTGTCCACTCCCAGGTCCAACTGCACCTCGGTTCTATCGATTGAATTCCACCATGGGATGGTCATGTATCATCCTTTTTCTAGTAGCAACTGCAACCGGTGTACATTCCGATATCCAGATGACACAGACTACATCCTCCCTGTCTGCCTCTCTGGGAGACAGAGTCACCATCAGTTGCAGGGCAAGTCAGGACATTAGCAATTATTTAAACTGGTATCAGCAGAAACCAGATGGAACTGTTAAACTCCTGATCTACTACACATCAAGATTACACTCAGGAGTCCCATCAAGGTTCAGTGGCAGTGGGTCTGGAACAGATTATTCTCTCACCATTAGCAACCTG…
	3	F6	M	0.014	F83HCf4	Musmus IGHV1-14*01 F	Musmus IGHJ3*01 F	Musmus IGHD1-2*01 F	ATCTACACATACGATTTAGGTGACACTATAGAATAACATCCACTTTGCCTTTCTCTCCACAGGTGTCCACTCCCAGGTCCAACTGCACCTCGGTTCTATCGATTGAATTCCACCATGGGATGGTCATGTATCATCCTTTTTCTAGTAGCAACTGCAACCGGTGTACATTCCGAGTTCCAGCTGCAGCAGTCTGGACCTGAGCTGGTAAAGCCTGGGGCTTCAGTGAAGATGTCCTGCAAGGCTTCTGGATACACATTCACTAGCTATGTTATGCACTGGGTGAAGCAGAAGCCTGGGCAGGGCCTTGAGTGGATTGGATTTATTAATCCTTACAATGATGGTACTAAGTGCAATGAGAAGTTCAAAGGCAAGGCCACACTGACTTCAGACAAATCCTCC…	Musmus IGKV3-2*01 F	Musmus IGKJ1*01 F	TCTACACATACGATTTAGGTGACACTATAGAATAACATCCACTTTGCCTTTCTCTCCACAGGTGTCCACTCCCAGGTCCAACTGCACCTCGGTTCTATCGATTGAATTCCACCATGGGATGGTCATGTATCATCCTTTTTCTAGTAGCAACTGCAACCGGTGTACATTCCGACATTGTGCTGACCCAATCTCCAGCTTCTTTGGCTGTGTCTCTAGGGCAGAGGGCCACCATCTCCTGCAGAGCCAGCGAAAGTGTTGATAATTATGGCATTAGTTTTCTGAACTGGTTCCAACAGAAACCAGGACAGCCACCCAAACTCCTCATCTATGCTGCATCCAACCAAGGATCCGGGGTCCCTGCCAGGTTTAGTGGCAGTGGGTCTGGGACAGACTTCAGCC…
	3	G6	G1	0.863	F83HCb5	Musmus IGHV1S137*01 [F]	Musmus IGHJ3*01 F		TCTACACATACGATTTAGGTGACACTATAGAATAACATCCACTTTGCCTTTCTCTCCACAGGTGTCCACTCCCAGGTCCAACTGCACCTCGGTTCTATCGATTGAATTCCACCATGGGATGGTCATGTATCATCCTTTTTCTAGTAGCAACTGCAACCGGTGTACATTCCCAGGTGCAGCTGCAGCAGTCTGGGGCTGAGCTGGTGAGGCCTGGGGTCTCAGTGAAGATTTCCTGCAAGGGTTCTGGCTACACATTCACTGATTATGCTATGCACTGGGTGAAGCAGAGTCATGCAAAGAGTCTAGAGTGGATTGGAGTTATTAGTACTTACTTTGGTGATGCTAGCTACAACCAGAAGTTCAAGGGCAAGGCCACAATGACTGTAGACAAATCCTCCA…	Musmus IGKV4-74*01 F	Musmus IGKJ2*01 F	CATTTAGGTGACACTATAGAATAACATCCACTTTGCCTTTCTCTCCACAGGTGTCCACTCCCAGGTCCAACTGCACCTCGGTTCTATCGATTGAATTCCACCATGGGATGGTCATGTATCATCCTTTTTCTAGTAGCAACTGCAACCGGTGTACATTTCCAAATTGTTCTCACCCAGTCTCCAGCAATCATGTCTGCATCTCTAGGGGAACGGGTCACCATGACCTGCACTGCCAGCTCAAGTGTAAGTTCCAGTTACTTGCACTGGTACCATCAGAAGCCAGGATCCTCCCCCAAACTCTGGATTTATAGCACATCCAACCTGGCTTCTGGAGTCCCAGCTCGCTTCAGTGGCAGTGGGTCTGGGACCTCTTACTCTCTCACAATCAGCAGCATGGAG…
	3	H6	G3	0.054	F83HCf6	Musmus IGHV5-6*01 F, or Musmus IGHV5-6*02 [F] or Musmus IGHV5-6*03 [F] or Musmus IGHV5-6-1*01 F	Musmus IGHJ4*01 F	Musmus IGHD2-12*01 F	ATCTACACATACGATTTAGGTGACACTATAGAATAACATCCACTTTGCCTTTCTCTCCACAGGTGTCCACTCCCAGGTCCAACTGCACCTCGGTTCTATCGATTGAATTCCACCATGGGATGGTCATGTATCATCCTTTTTCTAGTAGCAACTGCAACCGGTGTACATTCCGAGGTGCAGCTGGTGGAGTCTGGGGGAGACTTAGTGAAGCCTGGAGGGTCCCTGAAACTCTCCTGTGCAGGCTCTGGATTCGCTTTGAGAAGATATGGCATGTCTTGGATTCGCCAGATTCCAGACAAGAGGCTGGAATGGGTCGCAACCATTAGTAGTGGTGGTAATAACACCTACTATCCAGACAGTGTGAAGGGGCGATTCACCATCTCCAGAGACAATGCCGGG…	Musmus IGKV10-96*01 F	Musmus IGKJ2*01 F	CACATACGATTTAGGTGACACTATAGAATAACATCCACTTTGCCTTTCTCTCCACAGGTGTCCACTCCCAGGTCCAACTGCACCTCGGTTCTATCGATTGAATTCCACCATGGGATGGTCATGTATCATCCTTTTTCTAGTAGCAACTGCAACCGGTGTACATTCCGATATCCAGATGACACAGACTACATCCTCCCTGTCTGCCTCTCTGGGAGACAGAGTCACCATCAATTGCAGGGCAAGTCAGGACATTAGCAATTATTTAAACTGGTATCAGTTGAAACCAGATGGAACTATTAAACTCCTGATCTACTACACATCAAGATTACACTCAGGAGTCCCATCAAGGTTCAGTGGCAGTGGGTCTGGAACAGATTATTCTCTCACCATTAGCAACCT…
				*Anti E4 O.D. after background subtraction, from initial ELISA screen (see methods). Red readings deemed positive, with O.D. >0.1. rAb bound at 100ug/ml
Binding rAb data
Heavy Chains
Group	Antibody	ID	Isotype	anti-E4 EPT	V-GENE and allele	J-GENE	Subs	FR1 subs	CDR1 subs	FR2 subs	CDR2 subs	FR3 subs	D-GENE	AA JUNCTION
E4 Prime d7	A1	M61f1	M	1.70928	IGHV14-3*02 F	IGHJ3*01 F	0						IGHD2-1*01 F	CAYGNHFAYW
E4 Prime d7	E2	M63h2	M	1.34738	IGHV1-67*01 P, or IGHV1S137*01 [F]	IGHJ2*01 F	5				D64>N (+ + -)A65>T (- - -)	S66>N (- - -)D74>G (- - -)V101>I (+ - +)		CARTYLDYW
E4 Prime d 17	G2	M81f3	M	3.20499	IGHV1-37*01 F	IGHJ1*01 F	2			E51>A (- - -)		F99>S (- - -)	IGHD2-5*01 F	CGRSRNYGYWYFDVW
E4 Prime d 17	D3	M82c1	M	2.68498	IGHV1S137*01 [F]	IGHJ2*01 F	2	L12>V (+ - +)				V101>I (+ - +)		CARGAYYRYGYFDYW
E4 Prime d 17	F3	M82c3	M	2.70764	IGHV5-9-3*01 F	IGHJ3*01 F	4	A24>V (+ - +)	S36>N (- - -)		S58>G (+ + -)	Y66>C (- - -)	IGHD2-14*01 F	CARAYYRFDEEAFAYW
E4 Boost d7	B4	F81HCa3	M	2.11565	IGHV1-4*01 F	IGHJ3*01 F	4		S36>N (- - -)		G63>A (- + -)	K66>N (+ - -)D74>E (+ - +)	IGHD1-2*01 F	CARGHYYGPFTYW
E4 Boost d7	A5	F81HCe6	M	1.46481	IGHV1S56*01 F	IGHJ3*01 F	14	V2>I (+ - +)P9>A (- - -)A17>T (- - -)R20>K (+ + +)I21>L (+ + +)	N38>D (+ + -)	H40>N (- - -)K43>R (+ + +)G47>E (- - -)	Y57>F (- + -)N64>S (- - -)	T76>A (- - -)A80>T (- - -)S93>R (- - -)		CARLGGYLGAYW
E4 Boost d7	B5	F82HCb1	M	6.07967	IGHV1-37*01 F	IGHJ4*01 F	1					F99>S (- - -)	IGHD1-3*01 F	CGRSGYYAMDYW
E4 Boost d7	C5	F82HCh1	M	2.43162	IGHV1-37*01 F	IGHJ2*01 F	2					E90>D (+ - +)F99>S (- - -)	IGHD1-1*01 F	CGRSGITTLDYW
E4 Boost d7	F5	F82HCc2	M	2.80367	IGHV1-9*01 F	IGHJ4*01 F	5	L21>I (+ + +)	T35>S (+ - +)G36>S (+ + -)			T96>S (+ - +)I101>V (+ - +)	IGHD1-1*01 F	CVRRHYYGSRYAMDYW
E4 Boost d7	B6	F82HCa5	M	1.98107	IGHV1-87*01 F	IGHJ4*01 F	7	V19>M (+ - -)M21>L (+ + -)		A55>T (- - -)	D62>N (+ + -)	G74>D (- - -)R75>K (+ + +)T95>A (- - -)	IGHD2-1*01 F	CARGYYGHYRHAMDYW
E4 Boost d7	D6	F83HCd2	M	2.05923	IGHV1-20*02 F	IGHJ3*01 F	1				G63>A (- + -)		IGHD1-1*01 F	CARGAYYGGFAYW
E4 Boost d7	G6	F83HCb5	G1	5.01623	IGHV1S137*01 [F]	IGHJ3*01 F	2				Y62>F (- + -)	V101>I (+ - +)		CARRGDYGNYGFAYW
Kappa Chains
Group	Antibody	ID			V-GENE and allele	J-GENE	Subs	FR1 subs	CDR1 subs	FR2 subs	CDR2 subs	FR3 subs		AA JUNCTION
E4 Prime d7	A1	M61Kf1			IGKV9-120*01 F	IGKJ2*01 F	0							CLQYASSPYTF
E4 Prime d7	E2	M63Kh2			IGKV5-48*01 F	IGKJ5*01 F	1			Q44>R (+ - -)				CQQSNSWPLTF
E4 Prime d 17	G2	M81Kf3			IGKV3-3*01 F	IGKJ2*01 F	0							CQQNIEDPYTF
E4 Prime d 17	D3	M82Kc1			IGKV5-48*01 F	IGKJ2*01 F	0							CQQSNSWPTYTF
E4 Prime d 17	F3	M82Kc3			IGKV8-28*01 F	IGKJ2*01 F	1	S22>T (+ - +)						CQQYYNYPLTF
E4 Boost d7	B4	F81KCa3			IGKV8-28*01 F	IGKJ4*01 F	0							CQNDHSYPFTF
E4 Boost d7	A5	F81KCe6			IGKV14-111*01 F	IGKJ2*01 F	1					Y87>C (- - -)		CLQYDEFPYTF
E4 Boost d7	B5	F82KCb1			IGKV9-120*01 F	IGKJ1*01 F	1			E45>D (+ - +)				CLQYGSSPWTF
E4 Boost d7	C5	F82KCh1			IGKV8-27*01 F	IGKJ2*01 F	0							CHQYLSSYTF
E4 Boost d7	F5	F82KCc2			IGKV4-59*01 F	IGKJ2*01 F, or IGKJ2*03 F or IGKJ5*01 F (see comment)	1	A9>V (+ - +)						CQLWSSNPLTF
E4 Boost d7	B6	F82KCa5			IGKV8-30*01 F	IGKJ2*01 F, or IGKJ3*01 ORF or IGKJ5*01 F	1	A12>V (+ - +)						CQQYYSYPLTF
E4 Boost d7	D6	F83KCd2			IGKV14-100*01 F	IGKJ2*01 F	0							CVQYVQFPYTF
E4 Boost d7	G6	F83KCb5			IGKV4-74*01 F	IGKJ2*01 F	1			Q43>H (- + -)				CHQYHRSPPTF
